# Supplementary material
Source: Research Square preprint supplement (doi:10.21203/rs.3.rs-9963522/v1)
Supplement: Supplementary file 1 [file 1605503c9bc50b3134e98e03.xlsx]

## Sheet: Sheet1
Stkcd	Year	Digital	Speed	Size	Age	Industry	Design	Invention	ROAB	Dual	avrage	Digital_i	Industry_id	indyear_digital_sum	indyear_n	Digital_iv	Fepu
600438	2008	1.94591	1.5	22.3634	2.63906	A	0	0.693147	0.059324	0	2.38807	-0.442161	A	1.94591	1		0
2069	2009	2.07944	3	21.5489	2.19722	A	0	2.83321	0.050058	1	2.38807	-0.30863	A	4.47734	2	2.3979	0
600438	2009	2.3979	0.375	22.448	2.70805	A	0	1.09861	0.050058	0	2.38807	0.00982365	A	4.47734	2	2.07944	0
2069	2011	2.3979	0.444444	22.2094	2.3979	A	0	0	0.11313	1	2.38807	0.00982365	A	2.3979	1		0
600188	2008	0.693147	0.09375	24.1927	2.48491	B	0	0	0.059324	0	2.36209	-1.66894	B	5.81711	5	1.28099	2.05128
601898	2008	1.94591	1	25.2738	1.09861	B	0	2.83321	0.059324	0	2.36209	-0.416182	B	5.81711	5	0.9678	1.47601
600028	2008	2.07944	0.0555556	27.3463	2.19722	B	0	0	0.059324	0	2.36209	-0.28265	B	5.81711	5	0.934417	2.5
600583	2008	1.09861	3	23.5	2.19722	B	0	0	0.059324	0	2.36209	-1.26348	B	5.81711	5	1.17962	0.724638
601808	2008	0	8	24.7603	1.94591	B	0	9.30259	0.059324	0	2.36209	3.36209	B	5.81711	5	1.45428	0
601899	2009	1.79176	6	24.1126	2.30259	B	0	0	0.050058	0	2.36209	-0.570333	B	8.87179	7	1.18	0.537634
600497	2009	1.09861	1	22.7824	2.30259	B	0	0	0.050058	0	2.36209	-1.26348	B	8.87179	7	1.29553	8.10811
600583	2009	2.3979	0.875	23.5186	2.30259	B	0	0	0.050058	0	2.36209	0.0358032	B	8.87179	7	1.07898	0
600028	2009	1.79176	0.0408163	27.4877	2.30259	B	0	0	0.050058	0	2.36209	-0.570333	B	8.87179	7	1.18	3.48837
600188	2009	0.693147	0.08	24.8545	2.56495	B	0	0	0.050058	0	2.36209	-1.66894	B	8.87179	7	1.36311	0.840336
601808	2009	0	2.125	24.833	2.07944	B	0	2.77259	0.050058	0	2.36209	-2.36209	B	8.87179	7	1.47863	0
601958	2009	1.09861	0.25	23.3675	1.09861	B	0	0	0.050058	0	2.36209	-1.26348	B	8.87179	7	1.29553	0
600028	2010	2.30259	0.03125	27.6163	2.3979	B	0	0	0.132281	0	2.36209	-0.0595069	B	11.1844	8	1.26883	2.46914
601808	2010	1.09861	1.05556	24.8758	2.19722	B	0	3.95124	0.132281	0	2.36209	-1.26348	B	11.1844	8	1.44083	0
601958	2010	0.693147	0.111111	23.3887	1.38629	B	0	0	0.132281	0	2.36209	-1.66894	B	11.1844	8	1.49875	0.70922
600188	2010	1.60944	0.0555556	25.0114	2.63906	B	0	0	0.132281	1	2.36209	-0.752654	B	11.1844	8	1.36785	0.787402
600497	2010	1.38629	0.75	22.9424	2.3979	B	0	0	0.132281	0	2.36209	-0.975798	B	11.1844	8	1.39973	3.44828
601899	2010	1.09861	1.625	24.3714	2.3979	B	0	2.94444	0.132281	0	2.36209	-1.26348	B	11.1844	8	1.44083	0.413223
600997	2010	2.30259	1.5	23.4992	2.30259	B	1.38629	0	0.132281	0	2.36209	-0.0595069	B	11.1844	8	1.26883	2
601168	2010	0.693147	0.388889	23.8349	2.3979	B	2.07944	1.94591	0.132281	0	2.36209	-1.66894	B	11.1844	8	1.49875	0
2340	2011	1.09861	1	22.0915	1.79176	B	0	0	0.11313	1	2.36209	-1.26348	B	16.789	12	1.4264	1.1236
2554	2011	1.94591	2	21.0085	2.63906	B	1.09861	0.693147	0.11313	1	2.36209	-0.416182	B	16.789	12	1.34937	0
601600	2008	1.79176	4	25.6324	2.07944	C	0	5.12396	0.059324	1	2.3792	-0.587442	C	40.6748	45	0.883705	0
2182	2008	0	1	21.3018	2.77259	C	1.38629	0.693147	0.001485	1	2.3792	-2.3792	C	40.6748	45	0.924427	2.91971
2137	2008	0.693147	1	20.9199	2.3979	C	2.56495	0	0.001485	0	2.3792	-1.68605	C	40.6748	45	0.908674	0
2055	2008	0.693147	0.25	20.5403	1.94591	C	1.09861	0	0.001485	0	2.3792	-1.68605	C	40.6748	45	0.908674	1.67598
600196	2008	1.09861	0.125	22.7433	2.70805	C	0	0	0.059324	0	2.3792	-1.28059	C	40.6748	45	0.899458	1.41844
2202	2008	0.693147	2	23.1401	2.07944	C	2.77259	0.693147	0.001485	1	2.3792	-1.68605	C	40.6748	45	0.908674	0.469484
2218	2008	0	1	20.4501	0.693147	C	1.09861	0	0.001485	0	2.3792	-2.3792	C	40.6748	45	0.924427	0.83682
600839	2008	1.60944	0.166667	24.081	2.77259	C	0	5.71703	0.059324	0	2.3792	-0.769764	C	40.6748	45	0.887849	0
600557	2008	1.60944	0.5	20.9937	2.56495	C	0	0	0.059324	1	2.3792	-0.769764	C	40.6748	45	0.887849	4.6875
600276	2008	0.693147	0.25	21.5361	2.48491	C	0	0	0.059324	0	2.3792	-1.68605	C	40.6748	45	0.908674	3.57143
2191	2008	0	2	22.0465	2.56495	C	0	0	0.001485	1	2.3792	-2.3792	C	40.6748	45	0.924427	0.862069
816	2008	0	1	21.7785	2.48491	C	0	0	0.050058	1	2.3792	-2.3792	C	40.6748	45	0.924427	0
2103	2008	1.09861	0.625	20.8451	2.07944	C	2.94444	0	0.001485	0	2.3792	-1.28059	C	40.6748	45	0.899458	0.851064
600315	2008	0	0.0277778	21.2455	2.63906	C	0	0	0.059324	0	2.3792	-2.3792	C	40.6748	45	0.924427	0
600623	2008	1.60944	0.0546875	22.8856	2.83321	C	2.56495	0.693147	0.059324	0	2.3792	-0.769764	C	40.6748	45	0.887849	0
600439	2008	1.09861	0.12	21.3578	2.30259	C	0	0	0.059324	0	2.3792	-1.28059	C	40.6748	45	0.899458	0.934579
600177	2008	1.09861	0.1875	24.1774	2.77259	C	1.38629	0	0.059324	0	2.3792	-1.28059	C	40.6748	45	0.899458	0
600171	2008	2.30259	0.04	21.4238	2.3979	C	0	0	0.059324	0	2.3792	-0.0766167	C	40.6748	45	0.872095	1.8018
600660	2008	0.693147	0.0925926	22.9568	2.83321	C	0	0	0.059324	0	2.3792	-1.68605	C	40.6748	45	0.908674	0
2008	2008	1.09861	0.1875	21.9689	2.07944	C	0	0	0.001485	1	2.3792	-1.28059	C	40.6748	45	0.899458	0.507614
600961	2008	0	0.0625	22.3075	2.77259	C	0	0	0.059324	0	2.3792	-2.3792	C	40.6748	45	0.924427	1.59574
2222	2008	0.693147	1	20.246	2.07944	C	0	0.693147	0.001485	0	2.3792	-1.68605	C	40.6748	45	0.908674	1.31579
2085	2008	0	0.5	21.1237	2.07944	C	0	0	0.001485	0	2.3792	-2.3792	C	40.6748	45	0.924427	0
39	2008	1.09861	0.469136	24.2659	2.83321	C	0	4.69135	0.001485	0	2.3792	-1.28059	C	40.6748	45	0.899458	0
600216	2008	0	1	21.9063	2.48491	C	0	3.2581	0.059324	0	2.3792	-2.3792	C	40.6748	45	0.924427	0
600835	2008	1.09861	0.0277778	23.0724	2.77259	C	0	0	0.059324	0	2.3792	-1.28059	C	40.6748	45	0.899458	0
726	2008	0.693147	0.0277778	22.6822	2.77259	C	2.77259	1.94591	0.045915	0	2.3792	-1.68605	C	40.6748	45	0.908674	0
600535	2008	2.56495	0.25	21.9611	2.3979	C	2.30259	4.52179	0.059324	0	2.3792	0.185748	C	40.6748	45	0.866133	0.925926
528	2008	0	0.25	22.5594	2.77259	C	0	1.09861	0.001485	0	2.3792	-2.3792	C	40.6748	45	0.924427	0.829876
600019	2008	0.693147	0.666667	26.0217	2.19722	C	0	5.8999	0.059324	0	2.3792	-1.68605	C	40.6748	45	0.908674	0.77821
2138	2008	0	1	20.323	1.38629	C	2.07944	1.79176	0.001485	0	2.3792	-2.3792	C	40.6748	45	0.924427	0
26	2008	1.38629	1	21.0887	3.09104	C	2.19722	1.09861	0.001485	0	2.3792	-0.992907	C	40.6748	45	0.89292	0
2156	2008	0	2	21.3515	2.70805	C	0	0.693147	0.001485	0	2.3792	-2.3792	C	40.6748	45	0.924427	0.584795
600206	2008	1.79176	0.0625	20.8494	2.30259	C	0	0	0.059324	0	2.3792	-0.587442	C	40.6748	45	0.883705	3.52941
600352	2008	1.94591	0.388889	22.5357	2.3979	C	0	3.09104	0.059324	1	2.3792	-0.433292	C	40.6748	45	0.880202	0
2105	2008	0.693147	0.625	20.8077	1.79176	C	0	0	0.001485	0	2.3792	-1.68605	C	40.6748	45	0.908674	0.436681
55	2008	1.09861	0.0204082	21.0566	2.70805	C	0	3.3322	0.001485	1	2.3792	-1.28059	C	40.6748	45	0.899458	1.19048
2094	2008	0	0.75	20.4902	2.48491	C	4.68213	1.79176	0.001485	0	2.3792	-2.3792	C	40.6748	45	0.924427	0.653595
2001	2008	0	0.0625	22.0358	2.30259	C	0.693147	1.38629	0.001485	0	2.3792	-2.3792	C	40.6748	45	0.924427	0
2011	2008	0.693147	2	21.4611	2.07944	C	0	1.38629	0.001485	1	2.3792	-1.68605	C	40.6748	45	0.908674	0
2165	2008	1.60944	1	20.282	2.70805	C	0	1.38629	0.001485	1	2.3792	-0.769764	C	40.6748	45	0.887849	0.724638
100	2008	2.48491	1.6	23.8671	1.94591	C	0	0	0.001485	1	2.3792	0.105705	C	40.6748	45	0.867952	0.913242
600525	2008	0	0.111111	21.3128	3.13549	C	0	2.99573	0.059324	1	2.3792	-2.3792	C	40.6748	45	0.924427	1.03093
16	2008	2.63906	0.0493827	23.0794	3.3673	C	0	0	0.001485	0	2.3792	0.259856	C	40.6748	45	0.864448	0
78	2008	1.60944	1	21.7448	2.83321	C	0	2.19722	0.050058	0	2.3792	-0.769764	C	40.6748	45	0.887849	1.2
600171	2009	2.77259	0.0277778	21.3333	2.48491	C	2.83321	3.2581	0.050058	0	2.3792	0.393387	C	87.9821	75	1.15148	2.38095
636	2009	0	1	21.7126	2.77259	C	2.48491	2.07944	0.050058	0	2.3792	-2.3792	C	87.9821	75	1.18895	0
2224	2009	0	1	20.158	2.07944	C	2.19722	0	0.050058	0	2.3792	-2.3792	C	87.9821	75	1.18895	1.69492
39	2009	1.60944	0.25	24.3438	2.89037	C	0	4.5326	0.050058	0	2.3792	-0.769764	C	87.9821	75	1.1672	0
2137	2009	0	0.25	20.4434	2.48491	C	0	0	0.050058	0	2.3792	-2.3792	C	87.9821	75	1.18895	0
2202	2009	0.693147	1.875	23.4235	2.19722	C	3.09104	0.693147	0.050058	1	2.3792	-1.68605	C	87.9821	75	1.17958	0.543478
600839	2009	2.89037	0.0816327	24.3216	2.83321	C	1.09861	2.30259	0.050058	0	2.3792	0.51117	C	87.9821	75	1.14989	1.28205
726	2009	0.693147	0.0204082	22.5643	2.83321	C	2.48491	1.79176	0.050058	0	2.3792	-1.68605	C	87.9821	75	1.17958	0.694444
2083	2009	0	0.111111	22.6394	2.07944	C	2.07944	2.56495	0.050058	0	2.3792	-2.3792	C	87.9821	75	1.18895	1.11732
988	2009	2.19722	0.0123457	21.8174	2.3979	C	0	0	0.132281	0	2.3792	-0.181977	C	87.9821	75	1.15925	1.1976
2085	2009	0	0.222222	21.1569	2.19722	C	0	0	0.050058	0	2.3792	-2.3792	C	87.9821	75	1.18895	3.78788
709	2009	0	0.0625	25.3554	2.77259	C	0	2.70805	0.050058	0	2.3792	-2.3792	C	87.9821	75	1.18895	0
2203	2009	0	0.875	22.2349	2.19722	C	0	0	0.050058	0	2.3792	-2.3792	C	87.9821	75	1.18895	0.766284
55	2009	1.09861	0.015625	21.1172	2.77259	C	0	4.55388	0.050058	1	2.3792	-1.28059	C	87.9821	75	1.1741	1.0101
600819	2009	0.693147	0.06	22.4765	2.83321	C	0	0	0.050058	0	2.3792	-1.68605	C	87.9821	75	1.17958	0
2156	2009	0.693147	0.5	21.4632	2.77259	C	1.38629	0.693147	0.050058	0	2.3792	-1.68605	C	87.9821	75	1.17958	0
600320	2009	0	0.0204082	24.6564	2.89037	C	4.74493	4.60517	0.050058	0	2.3792	-2.3792	C	87.9821	75	1.18895	0
2182	2009	0.693147	0.25	21.4258	2.83321	C	2.56495	2.48491	0.050058	1	2.3792	-1.68605	C	87.9821	75	1.17958	1.11111
2106	2009	1.60944	0.25	21.4552	2.30259	C	3.3673	3.17805	0.050058	0	2.3792	-0.769764	C	87.9821	75	1.1672	0.534759
2152	2009	1.38629	2.5	21.5201	2.3979	C	3.4012	3.71357	0.050058	0	2.3792	-0.992907	C	87.9821	75	1.17021	0.46729
2218	2009	0	0.75	20.6199	1.09861	C	0	1.38629	0.050058	0	2.3792	-2.3792	C	87.9821	75	1.18895	1.59236
100	2009	1.60944	0.222222	24.1322	2.07944	C	0	0	0.050058	1	2.3792	-0.769764	C	87.9821	75	1.1672	0
600525	2009	1.38629	0.0714286	21.5831	3.17805	C	0	3.17805	0.050058	1	2.3792	-0.992907	C	87.9821	75	1.17021	1.19048
600439	2009	2.19722	0.0833333	21.7028	2.3979	C	0	0	0.050058	0	2.3792	-0.181977	C	87.9821	75	1.15925	1.83486
601600	2009	1.38629	0.25	25.6209	2.19722	C	5.0876	0	0.050058	1	2.3792	-0.992907	C	87.9821	75	1.17021	0
2008	2009	1.38629	0.14	22.2112	2.19722	C	0	0	0.050058	1	2.3792	-0.992907	C	87.9821	75	1.17021	0.490196
157	2009	1.09861	0.214286	24.2471	2.3979	C	0	0	0.050058	1	2.3792	-1.28059	C	87.9821	75	1.1741	3.25203
600362	2009	2.19722	0.09375	24.3618	2.56495	C	0	0	0.050058	1	2.3792	-0.181977	C	87.9821	75	1.15925	0
600177	2009	2.19722	0.4	24.4594	2.83321	C	1.60944	1.38629	0.050058	0	2.3792	-0.181977	C	87.9821	75	1.15925	0.735294
731	2009	0	1	21.7867	2.77259	C	2.83321	1.79176	0.050058	0	2.3792	-2.3792	C	87.9821	75	1.18895	0
600196	2009	2.56495	0.08	23.168	2.77259	C	0	0	0.050058	0	2.3792	0.185748	C	87.9821	75	1.15429	1.20482
2120	2009	0	3.5	20.6525	2.63906	C	0	0	0.050058	0	2.3792	-2.3792	C	87.9821	75	1.18895	0.60241
528	2009	1.60944	0.24	22.9814	2.83321	C	3.63759	1.09861	0.050058	0	2.3792	-0.769764	C	87.9821	75	1.1672	1.04712
2055	2009	1.79176	0.111111	20.7186	2.07944	C	0	0	0.050058	0	2.3792	-0.587442	C	87.9821	75	1.16473	1.52284
600808	2009	0.693147	0.03	24.9425	2.83321	C	0	0	0.050058	0	2.3792	-1.68605	C	87.9821	75	1.17958	0.534759
601766	2009	1.09861	2	24.7304	1.09861	C	0	0	0.050058	0	2.3792	-1.28059	C	87.9821	75	1.1741	2.1645
2175	2009	0.693147	1	19.8014	2.19722	C	0.693147	0	0.050058	0	2.3792	-1.68605	C	87.9821	75	1.17958	0
2078	2009	0	2	22.951	2.30259	C	2.19722	1.79176	0.050058	1	2.3792	-2.3792	C	87.9821	75	1.18895	1.15385
600104	2009	1.79176	0.388889	25.6517	2.56495	C	0	4.99721	0.050058	0	2.3792	-0.587442	C	87.9821	75	1.16473	2.5641
2131	2009	0	1	20.4337	2.19722	C	3.3673	0	0.050058	1	2.3792	-2.3792	C	87.9821	75	1.18895	0
26	2009	1.09861	0.375	21.1446	3.13549	C	1.79176	0	0.050058	0	2.3792	-1.28059	C	87.9821	75	1.1741	0
600660	2009	1.09861	0.075	22.9262	2.89037	C	0	0	0.050058	0	2.3792	-1.28059	C	87.9821	75	1.1741	0.813008
600584	2009	2.19722	0.0625	22.2818	2.30259	C	0	0	0.050058	1	2.3792	-0.181977	C	87.9821	75	1.15925	0
600889	2009	2.30259	0.0625	21.8787	2.89037	C	0	1.79176	0.050058	0	2.3792	-0.0766167	C	87.9821	75	1.15783	2.53165
2191	2009	1.38629	0.5	22.0368	2.63906	C	1.38629	1.60944	0.050058	1	2.3792	-0.992907	C	87.9821	75	1.17021	0.819672
600249	2009	0	1	22.1293	2.77259	C	1.38629	1.09861	0.050058	0	2.3792	-2.3792	C	87.9821	75	1.18895	0
2188	2009	1.38629	1	20.025	1.38629	C	1.79176	0	0.050058	0	2.3792	-0.992907	C	87.9821	75	1.17021	2.77778
2249	2009	2.30259	2	21.2993	1.38629	C	4.49981	2.56495	0.050058	0	2.3792	-0.0766167	C	87.9821	75	1.15783	0
2138	2009	1.09861	0.25	20.3161	1.60944	C	2.19722	2.07944	0.050058	0	2.3792	-1.28059	C	87.9821	75	1.1741	0
600623	2009	0	0.0432099	22.8899	2.89037	C	2.56495	1.79176	0.050058	0	2.3792	-2.3792	C	87.9821	75	1.18895	0
600206	2009	1.79176	0.04	20.8408	2.3979	C	0	0	0.050058	0	2.3792	-0.587442	C	87.9821	75	1.16473	1.25
600535	2009	2.30259	0.111111	22.1159	2.48491	C	1.94591	4.23411	0.050058	0	2.3792	-0.0766167	C	87.9821	75	1.15783	1.94175
2105	2009	1.38629	0.277778	20.7539	1.94591	C	0	0	0.050058	0	2.3792	-0.992907	C	87.9821	75	1.17021	0.444444
601727	2009	1.60944	6	25.2189	1.79176	C	5.40717	5.11799	0.050058	1	2.3792	-0.769764	C	87.9821	75	1.1672	0
50	2009	0	0.16	22.5914	3.29584	C	3.46574	4.51086	0.050058	0	2.3792	-2.3792	C	87.9821	75	1.18895	1.31579
600596	2009	2.30259	0.111111	22.4627	2.83321	C	0	2.63906	0.050058	0	2.3792	-0.0766167	C	87.9821	75	1.15783	3.61446
78	2009	2.19722	0.25	21.8753	2.89037	C	0	1.38629	0.01023	0	2.3792	-0.181977	C	87.9821	75	1.15925	0.363636
600216	2009	0.693147	0.25	22.079	2.56495	C	0	3.58352	0.050058	0	2.3792	-1.68605	C	87.9821	75	1.17958	0
2017	2009	2.19722	0.1875	20.6288	2.48491	C	2.07944	2.63906	0.050058	1	2.3792	-0.181977	C	87.9821	75	1.15925	1.01523
600152	2009	0.693147	0.01	21.9929	2.83321	C	0	0	0.050058	0	2.3792	-1.68605	C	87.9821	75	1.17958	0
600073	2009	1.09861	0.25	21.5732	2.56495	C	1.09861	1.09861	0.050058	0	2.3792	-1.28059	C	87.9821	75	1.1741	0
600352	2009	1.09861	0.125	22.9607	2.48491	C	0	0	0.050058	1	2.3792	-1.28059	C	87.9821	75	1.1741	0
600276	2009	2.48491	0.111111	21.8215	2.56495	C	0	0	0.050058	0	2.3792	0.105705	C	87.9821	75	1.15537	3.44828
600019	2009	2.63906	0.375	26.0273	2.30259	C	0	5.95324	0.050058	0	2.3792	0.259856	C	87.9821	75	1.15328	1.17647
2094	2009	0	0.222222	20.604	2.56495	C	4.62497	1.09861	0.050058	0	2.3792	-2.3792	C	87.9821	75	1.18895	1.44928
2165	2009	1.38629	0.25	20.4552	2.77259	C	0	1.94591	0.050058	1	2.3792	-0.992907	C	87.9821	75	1.17021	1.2012
600835	2009	1.79176	0.0204082	23.2968	2.83321	C	0	0	0.050058	0	2.3792	-0.587442	C	87.9821	75	1.16473	0.75188
2103	2009	0	0.277778	20.7751	2.19722	C	2.99573	0	0.050058	0	2.3792	-2.3792	C	87.9821	75	1.18895	0.947867
600060	2009	2.19722	0.0246914	23.0596	2.56495	C	0	0	0.050058	0	2.3792	-0.181977	C	87.9821	75	1.15925	0
600315	2009	0	0.0204082	21.3458	2.70805	C	0	0	0.050058	0	2.3792	-2.3792	C	87.9821	75	1.18895	1.17647
2084	2009	0.693147	0.111111	21.1355	1.94591	C	1.94591	0	0.050058	0	2.3792	-1.68605	C	87.9821	75	1.17958	0.485437
2227	2009	1.38629	1	20.3136	2.48491	C	0.693147	0	0.050058	1	2.3792	-0.992907	C	87.9821	75	1.17021	4.02299
2241	2009	1.09861	4	21.3168	2.19722	C	0	2.83321	0.050058	1	2.3792	-1.28059	C	87.9821	75	1.1741	1.44928
2011	2009	1.38629	0.5	21.8605	2.19722	C	0	1.38629	0.050058	1	2.3792	-0.992907	C	87.9821	75	1.17021	0
600557	2009	1.94591	0.222222	21.0917	2.63906	C	0	2.07944	0.050058	1	2.3792	-0.433292	C	87.9821	75	1.16265	1.40845
32	2010	2.3979	0.00826446	21.1217	2.89037	C	0	0	0.132281	0	2.3792	0.0186935	C	95.9814	75	1.26464	0.421941
600685	2010	1.60944	0.0306122	23.2212	2.89037	C	4.14313	1.60944	0.132281	0	2.3792	-0.769764	C	95.9814	75	1.2753	0
600196	2010	1.09861	0.125	23.5458	2.83321	C	0	0	0.132281	0	2.3792	-1.28059	C	95.9814	75	1.2822	0.809717
625	2010	1.38629	0.125	24.1396	2.70805	C	0	5.61677	0.132281	0	2.3792	-0.992907	C	95.9814	75	1.27831	1.07527
600439	2010	1.38629	0.122449	21.9557	2.48491	C	0	0	0.132281	0	2.3792	-0.992907	C	95.9814	75	1.27831	1.04167
2084	2010	2.07944	0.0625	21.2003	2.07944	C	2.89037	0	0.132281	0	2.3792	-0.29976	C	95.9814	75	1.26895	1.09091
300037	2010	0	1	20.8191	2.19722	C	0	2.3979	0.132281	0	2.3792	-2.3792	C	95.9814	75	1.29705	0.250627
2227	2010	1.60944	0.25	20.2973	2.56495	C	2.07944	0	0.132281	1	2.3792	-0.769764	C	95.9814	75	1.2753	1.4218
2030	2010	1.94591	1	20.3284	2.30259	C	0	2.3979	0.132281	0	2.3792	-0.433292	C	95.9814	75	1.27075	1.77515
2078	2010	1.09861	0.625	23.1739	2.3979	C	3.4012	1.94591	0.132281	1	2.3792	-1.28059	C	95.9814	75	1.2822	0.680272
528	2010	1.60944	0.208333	23.6462	2.89037	C	0	0	0.132281	0	2.3792	-0.769764	C	95.9814	75	1.2753	0.884956
2094	2010	0	0.125	20.5933	2.63906	C	4.70953	1.09861	0.132281	0	2.3792	-2.3792	C	95.9814	75	1.29705	1.2987
600320	2010	1.09861	0.015625	24.5363	2.94444	C	4.85981	4.66344	0.132281	0	2.3792	-1.28059	C	95.9814	75	1.2822	1.97044
2079	2010	1.09861	1	20.5632	3.04452	C	3.09104	1.79176	0.132281	1	2.3792	-1.28059	C	95.9814	75	1.2822	0.740741
2318	2010	1.79176	1	21.39	1.94591	C	0.693147	0	0.132281	0	2.3792	-0.587442	C	95.9814	75	1.27283	0.966184
600315	2010	1.09861	0.03125	21.4758	2.77259	C	0	0	0.132281	0	2.3792	-1.28059	C	95.9814	75	1.2822	1.23457
2303	2010	3.09104	1	21.4135	1.38629	C	3.66356	1.79176	0.132281	1	2.3792	0.711841	C	95.9814	75	1.25528	0.367647
2224	2010	0	0.25	20.2106	2.19722	C	2.19722	2.19722	0.132281	1	2.3792	-2.3792	C	95.9814	75	1.29705	0.793651
709	2010	1.38629	0.04	25.3766	2.83321	C	0	0	0.132281	0	2.3792	-0.992907	C	95.9814	75	1.27831	0
600889	2010	0	0.04	21.998	2.94444	C	0.693147	0.693147	0.132281	0	2.3792	-2.3792	C	95.9814	75	1.29705	4.61538
600557	2010	0	0.125	21.4101	2.70805	C	0	2.19722	0.132281	1	2.3792	-2.3792	C	95.9814	75	1.29705	1.2987
600019	2010	0	0.24	26.0988	2.3979	C	0	6.05912	0.132281	0	2.3792	-2.3792	C	95.9814	75	1.29705	0.796813
600525	2010	1.79176	0.0546875	22.1211	3.21888	C	0	0	0.132281	1	2.3792	-0.587442	C	95.9814	75	1.27283	2.5
601600	2010	0.693147	0.111111	25.6743	2.30259	C	0	4.49981	0.132281	1	2.3792	-1.68605	C	95.9814	75	1.28768	0
2008	2010	2.48491	0.0972222	22.4173	2.30259	C	0	0	0.132281	1	2.3792	0.105705	C	95.9814	75	1.26347	0.438596
600362	2010	0	0.06	24.7278	2.63906	C	0	0	0.132281	1	2.3792	-2.3792	C	95.9814	75	1.29705	0
600887	2010	0.693147	0.25	23.4552	2.89037	C	0	4.46591	0.132281	1	2.3792	-1.68605	C	95.9814	75	1.28768	0
600171	2010	1.09861	0.0204082	21.3821	2.56495	C	2.99573	3.13549	0.132281	0	2.3792	-1.28059	C	95.9814	75	1.2822	0
2202	2010	1.60944	1.11111	24.0577	2.30259	C	0	0	0.132281	1	2.3792	-0.769764	C	95.9814	75	1.2753	0
600535	2010	2.3979	0.0625	22.4194	2.56495	C	1.60944	4.26268	0.132281	0	2.3792	0.0186935	C	95.9814	75	1.26464	2.06186
2085	2010	0	0.125	21.1662	2.30259	C	0	0	0.132281	0	2.3792	-2.3792	C	95.9814	75	1.29705	0.699301
600429	2010	0.693147	0.0204082	21.7403	2.63906	C	1.09861	2.77259	0.132281	0	2.3792	-1.68605	C	95.9814	75	1.28768	0
600249	2010	0.693147	0.25	21.9195	2.83321	C	1.09861	0.693147	0.132281	0	2.3792	-1.68605	C	95.9814	75	1.28768	1.0101
726	2010	1.79176	0.015625	22.6714	2.89037	C	0	0	0.132281	0	2.3792	-0.587442	C	95.9814	75	1.27283	0.625
600352	2010	0	0.08	23.3177	2.56495	C	0	2.63906	0.132281	1	2.3792	-2.3792	C	95.9814	75	1.29705	0
2243	2010	1.60944	0.25	20.5043	1.38629	C	0	0	0.132281	0	2.3792	-0.769764	C	95.9814	75	1.2753	3.26087
600363	2010	2.07944	0.0277778	21.3228	2.48491	C	3.49651	2.07944	0.132281	0	2.3792	-0.29976	C	95.9814	75	1.26895	0
600219	2010	1.94591	0.333333	23.6652	2.89037	C	0	0	0.132281	0	2.3792	-0.433292	C	95.9814	75	1.27075	0
600216	2010	1.09861	0.111111	22.2574	2.63906	C	0	3.2581	0.132281	0	2.3792	-1.28059	C	95.9814	75	1.2822	1.26582
600226	2010	0.693147	0.09375	21.5289	2.48491	C	0	2.19722	0.132281	1	2.3792	-1.68605	C	95.9814	75	1.28768	0
601607	2010	1.60944	3	24.0615	2.83321	C	0	3.21888	0.132281	0	2.3792	-0.769764	C	95.9814	75	1.2753	0
49	2010	2.3979	1	20.5611	2.77259	C	2.63906	1.79176	0.132281	0	2.3792	0.0186935	C	95.9814	75	1.26464	0.763359
600200	2010	0	0.0277778	21.8035	2.83321	C	0	0	0.132281	0	2.3792	-2.3792	C	95.9814	75	1.29705	2.18978
2083	2010	0.693147	0.09375	22.6951	2.19722	C	2.63906	2.07944	0.132281	0	2.3792	-1.68605	C	95.9814	75	1.28768	1.85185
600104	2010	0.693147	0.21875	26.1563	2.63906	C	0	5.0689	0.132281	0	2.3792	-1.68605	C	95.9814	75	1.28768	0.833333
636	2010	1.09861	0.25	21.916	2.83321	C	0	0	0.132281	0	2.3792	-1.28059	C	95.9814	75	1.2822	3.57143
600183	2010	0.693147	0.111111	22.4396	3.2581	C	3.66356	4.23411	0.132281	0	2.3792	-1.68605	C	95.9814	75	1.28768	5.33333
600276	2010	0	0.0625	22.0831	2.63906	C	0	0	0.132281	0	2.3792	-2.3792	C	95.9814	75	1.29705	0
600166	2010	1.94591	3	23.9277	2.70805	C	0	0	0.132281	0	2.3792	-0.433292	C	95.9814	75	1.27075	1.69492
39	2010	1.79176	0.235537	24.7147	2.94444	C	0	4.51086	0.132281	0	2.3792	-0.587442	C	95.9814	75	1.27283	0.859599
600143	2010	2.56495	1	22.9595	2.89037	C	2.07944	4.5326	0.132281	0	2.3792	0.185748	C	95.9814	75	1.26238	2.5
600596	2010	1.09861	0.1875	22.5408	2.89037	C	0	2.3979	0.132281	0	2.3792	-1.28059	C	95.9814	75	1.2822	3.33333
2097	2010	1.38629	2	22.1914	2.30259	C	0	0	0.132281	1	2.3792	-0.992907	C	95.9814	75	1.27831	3.42466
50	2010	0.693147	0.111111	22.7991	3.3322	C	0	0	0.132281	0	2.3792	-1.68605	C	95.9814	75	1.28768	0
600152	2010	1.38629	0.00826446	22.0546	2.89037	C	0	0	0.132281	0	2.3792	-0.992907	C	95.9814	75	1.27831	0
2098	2010	1.38629	1	21.0093	2.94444	C	0.693147	0.693147	0.132281	0	2.3792	-0.992907	C	95.9814	75	1.27831	1.08303
600819	2010	1.60944	0.0416667	22.591	2.89037	C	1.79176	1.60944	0.132281	0	2.3792	-0.769764	C	95.9814	75	1.2753	0
300053	2010	2.30259	1	20.2148	2.3979	C	1.79176	2.07944	0.132281	1	2.3792	-0.0766167	C	95.9814	75	1.26593	0
600623	2010	0.693147	0.025	22.8578	2.94444	C	0	0	0.132281	0	2.3792	-1.68605	C	95.9814	75	1.28768	1.65289
600660	2010	0.693147	0.0702479	23.081	2.94444	C	0	2.30259	0.132281	0	2.3792	-1.68605	C	95.9814	75	1.28768	2.91971
2203	2010	0.693147	0.388889	22.4147	2.30259	C	0	1.79176	0.132281	0	2.3792	-1.68605	C	95.9814	75	1.28768	0.362319
2241	2010	1.09861	1	21.9121	2.30259	C	0	3.49651	0.132281	1	2.3792	-1.28059	C	95.9814	75	1.2822	1.27119
600438	2010	1.60944	0.166667	22.0269	2.77259	C	0.693147	1.09861	0.132281	0	2.3792	-0.769764	C	95.9814	75	1.2753	0.925926
2131	2010	0.693147	0.75	20.7769	2.30259	C	0	0	0.132281	1	2.3792	-1.68605	C	95.9814	75	1.28768	0
600580	2010	0.693147	2	22.1254	2.56495	C	0	2.94444	0.132281	0	2.3792	-1.68605	C	95.9814	75	1.28768	0.947867
2094	2011	0	0.08	20.7245	2.70805	C	4.64439	0.693147	0.11313	0	2.3792	-2.3792	C	220.922	141	1.57801	0.621118
629	2011	1.38629	0.625	24.1679	2.94444	C	0	0	0.11313	0	2.3792	-0.992907	C	220.922	141	1.56811	1.0929
528	2011	1.09861	0.214286	23.8479	2.94444	C	0	0	0.11313	0	2.3792	-1.28059	C	220.922	141	1.57017	0.531915
2282	2011	1.38629	1	20.807	2.63906	C	1.38629	1.09861	0.11313	0	2.3792	-0.992907	C	220.922	141	1.56811	0.371747
2518	2011	2.83321	1	21.1353	2.94444	C	0	1.60944	0.11313	1	2.3792	0.454012	C	220.922	141	1.55778	0.395257
2516	2011	2.07944	1	21.3329	2.48491	C	2.94444	1.09861	0.11313	1	2.3792	-0.29976	C	220.922	141	1.56316	0.900901
78	2011	2.19722	0.125	22.2992	2.99573	C	0	0	0.11313	0	2.3792	-0.181977	C	220.922	141	1.56232	0.369004
930	2011	0.693147	0.03	22.5916	2.63906	C	0	2.19722	0.02202	0	2.3792	-1.68605	C	220.922	141	1.57306	0
2050	2011	0.693147	0.333333	22.2996	2.3979	C	0	4.12713	0.11313	0	2.3792	-1.68605	C	220.922	141	1.57306	1.68776
49	2011	1.60944	0.25	21.0734	2.83321	C	3.95124	2.94444	0.11313	0	2.3792	-0.769764	C	220.922	141	1.56652	0
925	2011	0.693147	0.375	21.7719	2.56495	C	2.19722	2.07944	0.02202	0	2.3792	-1.68605	C	220.922	141	1.57306	1.31579
2203	2011	1.09861	0.21875	22.6603	2.3979	C	4.44265	2.63906	0.11313	0	2.3792	-1.28059	C	220.922	141	1.57017	1.36986
2241	2011	2.70805	0.666667	22.4404	2.3979	C	0	3.78419	0.11313	1	2.3792	0.328848	C	220.922	141	1.55867	1.20482
2103	2011	0.693147	0.1	20.9115	2.3979	C	2.94444	0	0.11313	0	2.3792	-1.68605	C	220.922	141	1.57306	0.97561
2156	2011	2.30259	0.0625	21.9442	2.89037	C	0	0	0.11313	0	2.3792	-0.0766167	C	220.922	141	1.56157	0
2167	2011	0.693147	1.5	21.5247	2.83321	C	0.693147	1.79176	0.11313	1	2.3792	-1.68605	C	220.922	141	1.57306	0.628931
2227	2011	2.48491	0.111111	20.3828	2.63906	C	0.693147	0	0.11313	1	2.3792	0.105705	C	220.922	141	1.56026	1.88679
2351	2011	1.38629	0.75	21.258	2.3979	C	0	0	0.11313	1	2.3792	-0.992907	C	220.922	141	1.56811	0.611621
756	2011	1.09861	0.015625	21.8233	2.94444	C	0	0	0.11313	0	2.3792	-1.28059	C	220.922	141	1.57017	0
2295	2011	1.09861	1	21.1424	1.94591	C	2.3979	1.09861	0.11313	0	2.3792	-1.28059	C	220.922	141	1.57017	2.57732
2085	2011	1.38629	0.08	21.6672	2.3979	C	0	0	0.11313	0	2.3792	-0.992907	C	220.922	141	1.56811	1.86916
2011	2011	2.30259	0.125	22.7412	2.3979	C	0	4.23411	0.11313	0	2.3792	-0.0766167	C	220.922	141	1.56157	0.323625
2278	2011	1.79176	0.25	21.1229	2.94444	C	3.3322	1.94591	0.11313	0	2.3792	-0.587442	C	220.922	141	1.56522	2.30769
2470	2011	1.38629	1	22.4268	2.63906	C	0	4.67283	0.11313	1	2.3792	-0.992907	C	220.922	141	1.56811	1.08696
2055	2011	1.09861	0.04	21.4529	2.30259	C	3.2581	1.38629	0.11313	1	2.3792	-1.28059	C	220.922	141	1.57017	0.49505
2130	2011	1.38629	0.111111	20.9316	2.63906	C	3.80666	2.77259	0.11313	0	2.3792	-0.992907	C	220.922	141	1.56811	1.12994
778	2011	1.60944	1	24.2111	2.70805	C	0	4.29046	0.11313	0	2.3792	-0.769764	C	220.922	141	1.56652	0.42735
2456	2011	1.60944	2	21.5907	1.60944	C	3.04452	1.38629	0.11313	0	2.3792	-0.769764	C	220.922	141	1.56652	0.526316
726	2011	1.94591	0.0123457	22.7712	2.94444	C	0	3.7612	0.11313	0	2.3792	-0.433292	C	220.922	141	1.56411	0.645161
2328	2011	1.38629	3	21.7169	2.70805	C	1.38629	0.693147	0.11313	0	2.3792	-0.992907	C	220.922	141	1.56811	0.344828
2202	2011	2.07944	0.40625	24.1874	2.3979	C	3.98898	2.19722	0.11313	1	2.3792	-0.29976	C	220.922	141	1.56316	3.10881
2489	2011	2.30259	3	22.0954	1.60944	C	0	0	0.11313	1	2.3792	-0.0766167	C	220.922	141	1.56157	0.719424
425	2011	2.30259	2.5	24.2704	2.94444	C	0	2.94444	0.11313	1	2.3792	-0.0766167	C	220.922	141	1.56157	0.546448
2255	2011	0.693147	1	21.538	2.48491	C	2.19722	2.07944	0.11313	1	2.3792	-1.68605	C	220.922	141	1.57306	2
2191	2011	1.09861	0.125	21.9661	2.77259	C	1.79176	2.30259	0.11313	0	2.3792	-1.28059	C	220.922	141	1.57017	0.938967
2303	2011	2.56495	0.5	21.4147	1.60944	C	0	0	0.11313	1	2.3792	0.185748	C	220.922	141	1.55969	0.904977
2243	2011	2.48491	0.111111	20.8529	1.60944	C	4.36945	3.29584	0.11313	0	2.3792	0.105705	C	220.922	141	1.56026	2.00803
2017	2011	3.61092	0.125	20.8916	2.63906	C	0	0	0.11313	1	2.3792	1.23172	C	220.922	141	1.55222	0.813008
2021	2011	0	0.375	21.6834	2.89037	C	3.3322	1.94591	0.11313	0	2.3792	-2.3792	C	220.922	141	1.57801	0
2440	2011	2.56495	1.5	22.3502	2.07944	C	0	2.63906	0.11313	0	2.3792	0.185748	C	220.922	141	1.55969	2.45399
2294	2011	2.07944	1	21.6174	2.63906	C	1.09861	1.38629	0.11313	0	2.3792	-0.29976	C	220.922	141	1.56316	1.88679
2311	2011	0	3	22.1643	1.60944	C	3.4012	1.79176	0.11313	1	2.3792	-2.3792	C	220.922	141	1.57801	0
100	2011	2.48491	0.90625	25.0275	2.30259	C	0	0	0.11313	1	2.3792	0.105705	C	220.922	141	1.56026	0
2126	2011	1.38629	0.5	21.5728	2.56495	C	0	1.09861	0.11313	0	2.3792	-0.992907	C	220.922	141	1.56811	0
731	2011	0.693147	0.111111	22.0714	2.89037	C	0	1.94591	0.11313	0	2.3792	-1.68605	C	220.922	141	1.57306	0.588235
2224	2011	1.38629	0.111111	20.3517	2.30259	C	0.693147	0	0.11313	1	2.3792	-0.992907	C	220.922	141	1.56811	1.43885
2078	2011	1.38629	0.333333	23.4438	2.48491	C	3.09104	2.56495	0.11313	1	2.3792	-0.992907	C	220.922	141	1.56811	0.956938
158	2011	1.38629	1	22.3893	2.63906	C	0	0	0.11313	0	2.3792	-0.992907	C	220.922	141	1.56811	0
625	2011	1.38629	0.16	24.3215	2.77259	C	0	5.89715	0.11313	0	2.3792	-0.992907	C	220.922	141	1.56811	2.15054
2010	2011	2.07944	1	21.5898	2.3979	C	0	0	0.11313	0	2.3792	-0.29976	C	220.922	141	1.56316	0
2318	2011	1.79176	0.25	21.6477	2.07944	C	1.09861	1.09861	0.11313	0	2.3792	-0.587442	C	220.922	141	1.56522	0.5
39	2011	1.38629	0.215278	24.8878	2.99573	C	0	4.79579	0.11313	0	2.3792	-0.992907	C	220.922	141	1.56811	2.2792
2152	2011	1.94591	0.388889	21.9404	2.56495	C	2.07944	3.63759	0.11313	0	2.3792	-0.433292	C	220.922	141	1.56411	0
2249	2011	2.99573	0.277778	21.9772	1.79176	C	4.96981	4.15888	0.11313	0	2.3792	0.61653	C	220.922	141	1.55662	0.490196
2120	2011	1.09861	0.388889	20.8261	2.77259	C	4.09434	2.30259	0.11313	0	2.3792	-1.28059	C	220.922	141	1.57017	0.436681
2083	2011	0.693147	0.06	22.7241	2.30259	C	1.94591	1.94591	0.11313	0	2.3792	-1.68605	C	220.922	141	1.57306	1.79641
2098	2011	1.79176	0.25	21.0223	2.99573	C	0	3.73767	0.11313	0	2.3792	-0.587442	C	220.922	141	1.56522	0.813008
2429	2011	2.83321	2	22.3541	1.60944	C	3.04452	0.693147	0.11313	0	2.3792	0.454012	C	220.922	141	1.55778	0
2165	2011	2.30259	0.0625	21.1531	2.89037	C	0	2.19722	0.11313	0	2.3792	-0.0766167	C	220.922	141	1.56157	1.2987
2106	2011	1.60944	0.0625	21.7492	2.48491	C	3.73767	3.82864	0.11313	0	2.3792	-0.769764	C	220.922	141	1.56652	0.909091
2105	2011	1.94591	0.08	21.0655	2.19722	C	2.99573	0	0.11313	0	2.3792	-0.433292	C	220.922	141	1.56411	1.23967
2206	2011	2.3979	0.25	21.693	2.3979	C	0.693147	1.09861	0.11313	0	2.3792	0.0186935	C	220.922	141	1.56089	0.925926
55	2011	1.09861	0.01	21.4949	2.89037	C	0	4.35671	0.11313	1	2.3792	-1.28059	C	220.922	141	1.57017	0.934579
2008	2011	2.56495	0.102041	22.5262	2.3979	C	0	0	0.11313	1	2.3792	0.185748	C	220.922	141	1.55969	0.487805
2384	2011	1.79176	2	21.3822	2.63906	C	3.46574	1.38629	0.11313	0	2.3792	-0.587442	C	220.922	141	1.56522	0.425532
2174	2011	0.693147	0.0625	19.9455	2.83321	C	2.3979	0	0.11313	0	2.3792	-1.68605	C	220.922	141	1.57306	0.534759
636	2011	1.60944	0.277778	21.9201	2.89037	C	0	0	0.11313	0	2.3792	-0.769764	C	220.922	141	1.56652	0
2334	2011	3.09104	1	20.9873	1.79176	C	2.63906	0	0.11313	1	2.3792	0.711841	C	220.922	141	1.55594	1.33333
2430	2011	2.99573	1	22.559	2.30259	C	2.70805	2.19722	0.11313	0	2.3792	0.61653	C	220.922	141	1.55662	0.724638
709	2011	1.94591	0.0277778	25.6723	2.89037	C	0	0	0.11313	0	2.3792	-0.433292	C	220.922	141	1.56411	0.877193
2182	2011	1.79176	0.0625	21.585	2.94444	C	0	0	0.11313	1	2.3792	-0.587442	C	220.922	141	1.56522	2.25564
2409	2011	0.693147	3	20.9836	2.70805	C	0	0	0.11313	1	2.3792	-1.68605	C	220.922	141	1.57306	1.06952
513	2011	1.60944	0.0104167	22.25	3.29584	C	2.3979	2.3979	0.11313	1	2.3792	-0.769764	C	220.922	141	1.56652	0.840336
32	2011	1.79176	0.00694444	21.177	2.94444	C	0	0	0.11313	0	2.3792	-0.587442	C	220.922	141	1.56522	0
2045	2011	1.79176	0.111111	21.7488	2.94444	C	3.91202	1.09861	0.11313	1	2.3792	-0.587442	C	220.922	141	1.56522	0.943396
157	2011	1.79176	0.0925926	24.9941	2.56495	C	0	6.22456	0.11313	1	2.3792	-0.587442	C	220.922	141	1.56522	0.787402
2030	2011	2.3979	0.25	20.4816	2.3979	C	0	2.70805	0.11313	0	2.3792	0.0186935	C	220.922	141	1.56089	0.531915
2131	2011	0	0.333333	21.3213	2.3979	C	0	0	0.11313	1	2.3792	-2.3792	C	220.922	141	1.57801	0.414938
999	2011	1.94591	0.02	22.7513	2.56495	C	0	2.3979	0.02202	0	2.3792	-0.433292	C	220.922	141	1.56411	2.94118
837	2011	1.79176	0.0306122	21.4498	2.63906	C	1.60944	1.60944	0.02202	0	2.3792	-0.587442	C	220.922	141	1.56522	0.704225
16	2011	3.09104	0.0347222	23.551	3.46574	C	0	5.3033	0.11313	0	2.3792	0.711841	C	220.922	141	1.55594	1.13208
2426	2011	1.09861	2	21.3589	1.38629	C	2.70805	2.30259	0.11313	0	2.3792	-1.28059	C	220.922	141	1.57017	0
2111	2011	1.94591	0.25	21.1869	2.30259	C	3.46574	2.07944	0.11313	0	2.3792	-0.433292	C	220.922	141	1.56411	1.14943
651	2011	1.09861	0.0243056	25.1684	3.13549	C	0	2.56495	0.11313	0	2.3792	-1.28059	C	220.922	141	1.57017	2.85714
2348	2011	0.693147	0.25	20.9116	3.13549	C	4.44265	0.693147	0.11313	1	2.3792	-1.68605	C	220.922	141	1.57306	2.85714
9	2008	0	0.0555556	22.5289	2.94444	M	0	0	0.050058	1	2.37019	-2.37019	M	2.19722	2	2.19722	0.628931
21	2008	1.60944	0.0123457	22.1892	2.77259	G	0	2.07944	0.001485	1	2.37902	-0.769581	G	25.5107	10	2.6557	0
32	2008	0	0.0123457	21.0309	2.77259	G	2.63906	1.60944	0.001485	0	2.37902	-2.37902	G	25.5107	10	2.83453	1.27389
503	2008	2.19722	0.132653	21.2132	2.89037	M	0	0	0.001485	0	2.37019	-0.17297	M	2.19722	2	3.96682e-08	5.12821
2151	2008	2.3979	1	19.7226	2.19722	G	0	2.07944	0.001485	0	2.37902	0.0188763	G	25.5107	10	2.56809	1.12994
600018	2008	2.19722	0.04	24.8022	3.04452	F	0	0	0.059324	0	2.35517	-0.157941	F	2.19722	1		0.938967
600100	2008	3.78419	0.64	23.6181	2.48491	G	4.51086	4.89035	0.059324	0	2.37902	1.40517	G	25.5107	10	2.41406	0.831025
600130	2008	1.38629	0.0625	20.7702	2.63906	G	0	0	0.059324	0	2.37902	-0.992725	G	25.5107	10	2.68049	0
600271	2008	3.7612	0.0625	22.2699	2.19722	G	0	3.58352	0.059324	0	2.37902	1.38218	G	25.5107	10	2.41661	0
600536	2008	3.78419	0.125	21.6742	2.19722	G	0	0	0.059324	0	2.37902	1.40517	G	25.5107	10	2.41406	0.487805
600570	2008	2.56495	0.333333	20.6312	2.19722	G	0	0	0.059324	0	2.37902	0.18593	G	25.5107	10	2.54953	2.94118
600588	2008	3.73767	0.0204082	21.8579	2.30259	G	0	2.3979	0.059324	1	2.37902	1.35865	G	25.5107	10	2.41923	0
600718	2008	2.48491	0.0546875	22.4448	2.89037	G	0	0	0.059324	1	2.37902	0.105888	G	25.5107	10	2.55843	0.729927
600820	2008	1.09861	0.0408163	23.419	2.77259	E	0	0	0.059324	0	2.3557	-1.25709	E	3.04452	2	1.94591	0
601186	2008	1.94591	1	26.1174	0.693147	E	0	0	0.059324	0	2.3557	-0.409792	E	3.04452	2	1.09861	0.881057
21	2009	1.09861	0.01	22.4149	2.83321	G	2.30259	2.30259	0.050058	1	2.37902	-1.28041	G	29.0815	10	3.1092	1.20482
32	2009	1.79176	0.01	21.0867	2.83321	G	3.21888	1.38629	0.050058	0	2.37902	-0.58726	G	29.0815	10	3.03219	0
90	2009	1.38629	0.0123457	22.4965	2.83321	E	2.19722	2.07944	0.132281	0	2.3557	-0.969407	E	9.24648	5	1.96505	0
2062	2009	0.693147	1	22.5332	2.77259	E	0	1.09861	0.050058	0	2.3557	-1.66255	E	9.24648	5	2.13833	1.5873
2115	2009	2.07944	1	21.1128	1.79176	G	1.94591	1.38629	0.050058	0	2.37902	-0.299577	G	29.0815	10	3.00022	0.75188
2151	2009	2.83321	0.25	19.9954	2.30259	G	0	0	0.050058	0	2.37902	0.454194	G	29.0815	10	2.91647	0.598802
600100	2009	4.34381	0.402778	23.7862	2.56495	G	4.12713	4.70048	0.050058	0	2.37902	1.96479	G	29.0815	10	2.74863	1.45349
600271	2009	3.55535	0.04	22.4368	2.30259	G	4.20469	4.09434	0.050058	1	2.37902	1.17633	G	29.0815	10	2.83623	0.934579
600491	2009	2.19722	1.25	22.7802	2.70805	E	0	0	0.050058	0	2.3557	-0.158477	E	9.24648	5	1.76231	0.46729
600496	2009	2.19722	1.375	22.1631	2.3979	E	0	0	0.050058	0	2.3557	-0.158477	E	9.24648	5	1.76231	4.06504
600536	2009	3.66356	0.04	21.7719	2.30259	G	0	1.60944	0.050058	1	2.37902	1.28454	G	29.0815	10	2.82421	0
600601	2009	2.77259	0.0694444	22.4501	3.21888	G	1.60944	2.77259	0.050058	0	2.37902	0.39357	G	29.0815	10	2.92321	1.31579
600718	2009	3.3322	0.0864198	22.5493	2.94444	G	0	0	0.050058	1	2.37902	0.953186	G	29.0815	10	2.86103	0.714286
600739	2009	1.38629	0.03125	22.8495	2.83321	H	0	0	0.050058	0	2.39025	-1.00395	H	1.38629	1		1.35135
600845	2009	3.61092	0.0277778	21.4191	2.77259	G	0	3.78419	0.050058	0	2.37902	1.2319	G	29.0815	10	2.83006	1.5625
601186	2009	2.77259	0.5	26.3687	1.09861	E	0	0	0.050058	0	2.3557	0.416887	E	9.24648	5	1.61847	1.63265
21	2010	1.38629	0.00826446	22.6204	2.89037	G	3.13549	0.693147	0.132281	0	2.37902	-0.992725	G	38.3602	13	3.08116	0
26	2010	1.09861	0.277778	21.6138	3.17805	H	0	0	0.132281	0	2.39025	-1.29163	H	1.09861	1		0
66	2010	2.30259	2	24.2175	2.63906	G	0	3.68888	0.132281	0	2.37902	-0.0764339	G	38.3602	13	3.0048	1.04712
90	2010	2.19722	0.01	23.0417	2.89037	E	2.19722	1.09861	0.11313	0	2.3557	-0.158477	E	10.7506	5	2.13833	1.26582
2073	2010	2.63906	1	22.1257	2.3979	G	3.3322	1.79176	0.132281	0	2.37902	0.260038	G	38.3602	13	2.97676	2.77778
300012	2010	2.83321	1	20.468	2.07944	K	2.19722	0.693147	0.132281	0	2.37019	0.463019	K	2.83321	1		0.860585
300042	2010	2.83321	1	20.6143	2.48491	G	0	3.52636	0.132281	1	2.37902	0.454194	G	38.3602	13	2.96058	0.918836
300045	2010	2.07944	1	20.3643	1.09861	G	1.94591	1.09861	0.132281	1	2.37902	-0.299577	G	38.3602	13	3.0234	0.57971
300050	2010	1.60944	1	21.2259	2.30259	G	1.38629	0	0.132281	1	2.37902	-0.769581	G	38.3602	13	3.06256	0.531915
300051	2010	3.89182	1	20.179	1.94591	G	1.09861	0	0.132281	1	2.37902	1.5128	G	38.3602	13	2.87237	0.596421
600018	2010	1.79176	0.0408163	24.9113	3.13549	F	0	0	0.132281	0	2.35517	-0.563406	F	1.79176	1		0
600100	2010	4.23411	0.336735	23.9367	2.63906	G	4.09434	4.66344	0.132281	0	2.37902	1.85509	G	38.3602	13	2.84384	0.879765
600496	2010	1.79176	0.666667	22.1699	2.48491	E	0	0	0.132281	0	2.3557	-0.563942	E	10.7506	5	2.2397	3.80952
600536	2010	3.97029	0.0277778	21.7008	2.3979	G	0	0	0.132281	0	2.37902	1.59127	G	38.3602	13	2.86583	0
601618	2010	2.77259	4.5	26.387	1.09861	E	0	6.70686	0.132281	0	2.3557	0.416887	E	10.7506	5	1.99449	1.96078
601186	2010	3.29584	0.333333	26.5818	1.38629	E	0	0	0.132281	0	2.3557	0.940135	E	10.7506	5	1.86368	1.42857
600820	2010	0.693147	0.0246914	23.7247	2.89037	E	1.38629	3.21888	0.132281	0	2.3557	-1.66255	E	10.7506	5	2.51435	0
2163	2011	1.94591	0.277778	22.5925	2.83321	E	0	0	0.11313	0	2.3557	-0.409792	E	12.9629	6	2.2034	0
90	2011	3.3673	0.00826446	22.7382	2.94444	E	1.38629	1.38629	0.02202	1	2.3557	1.01159	E	12.9629	6	1.91912	0.546448
600718	2010	3.09104	0.085	22.6488	2.99573	G	0	0	0.132281	1	2.37902	0.712023	G	38.3602	13	2.9391	2.22222
600764	2010	2.63906	0.06	21.1723	2.89037	G	1.79176	1.94591	0.132281	1	2.37902	0.260038	G	38.3602	13	2.97676	0.980392
600845	2010	3.97029	0.0204082	21.6364	2.83321	G	0	5.42495	0.132281	0	2.37902	1.59127	G	38.3602	13	2.86583	1.38889
26	2011	1.94591	0.1875	21.7865	3.21888	H	2.30259	1.09861	0.11313	0	2.39025	-0.444337	H	3.04452	2	1.09861	0.819672
45	2011	1.09861	0.00694444	21.3156	3.4012	M	2.56495	1.38629	0.11313	0	2.37019	-1.27158	M	1.09861	1		0.78125
66	2011	2.89037	0.5	24.2137	2.70805	G	0	4.94164	0.11313	0	2.37902	0.511353	G	78.9993	24	3.30908	1.04167
997	2011	4.12713	0.75	21.6193	2.56495	G	0	0	0.02202	0	2.37902	1.74812	G	78.9993	24	3.25531	0.625
2073	2011	2.89037	0.875	22.4053	2.48491	G	3.3322	3.2581	0.11313	0	2.37902	0.511353	G	78.9993	24	3.30908	3.73134
2194	2011	2.48491	0.25	21.561	3.13549	G	3.52636	1.38629	0.11313	0	2.37902	0.105888	G	78.9993	24	3.32671	0.490196
2383	2011	3.49651	2	21.2441	1.60944	G	2.48491	2.89037	0.11313	1	2.37902	1.11749	G	78.9993	24	3.28273	0
2376	2011	1.79176	1.5	21.1456	2.30259	G	3.8712	3.63759	0.11313	0	2.37902	-0.58726	G	78.9993	24	3.35685	0
2115	2011	3.21888	0.111111	21.4474	2.07944	G	2.63906	2.3979	0.11313	0	2.37902	0.839857	G	78.9993	24	3.2948	0.704225
2151	2011	3.3322	0.0625	20.9425	2.48491	G	1.60944	0	0.11313	0	2.37902	0.953186	G	78.9993	24	3.28987	2.26244
2091	2011	1.09861	0.0625	21.3378	2.63906	H	0.693147	2.77259	0.11313	0	2.39025	-1.29163	H	3.04452	2	1.94591	1.6129
300012	2011	2.99573	0.25	20.5618	2.19722	K	2.83321	1.38629	0.11313	0	2.37019	0.625538	K	5.29832	2	2.30259	1.38568
300017	2011	3.55535	1	20.549	2.48491	G	0	2.48491	0.11313	1	2.37902	1.17633	G	78.9993	24	3.28017	0.230947
300036	2011	4.12713	0.5	20.4014	2.70805	G	0	1.09861	0.11313	0	2.37902	1.74812	G	78.9993	24	3.25531	0.182815
300037	2011	1.09861	0.25	20.9239	2.30259	C	0	1.79176	0.11313	0	2.3792	-1.28059	C	220.922	141	1.57017	0.510204
300042	2011	3.66356	0.25	20.6342	2.56495	G	0	2.3979	0.11313	1	2.37902	1.28454	G	78.9993	24	3.27546	0.969697
300043	2011	2.3979	0.25	20.6647	2.48491	C	2.48491	1.38629	0.11313	1	2.3792	0.0186935	C	220.922	141	1.56089	0.392157
300045	2011	2.30259	0.25	20.478	1.38629	G	0	1.94591	0.11313	1	2.37902	-0.0764339	G	78.9993	24	3.33464	0
300050	2011	2.3979	0.5	21.2492	2.3979	G	0	0	0.11313	1	2.37902	0.0188763	G	78.9993	24	3.33049	0.552486
300051	2011	3.46574	0.25	20.3281	2.07944	G	1.60944	0.693147	0.11313	1	2.37902	1.08672	G	78.9993	24	3.28407	0.591716
300053	2011	2.63906	0.25	20.2408	2.48491	C	1.79176	0	0.11313	1	2.3792	0.259856	C	220.922	141	1.55916	0
300061	2011	1.38629	2	20.2702	2.77259	C	0.693147	0	0.11313	1	2.3792	-0.992907	C	220.922	141	1.56811	0.411523
300065	2011	2.77259	1.5	20.4164	2.3979	G	2.83321	1.09861	0.11313	0	2.37902	0.39357	G	78.9993	24	3.3142	0.184502
300068	2011	2.56495	4	21.8993	2.70805	C	2.19722	2.30259	0.11313	0	2.3792	0.185748	C	220.922	141	1.55969	0.722022
300084	2011	1.38629	2	20.3267	2.48491	B	0.693147	0.693147	0.11313	1	2.36209	-0.975798	B	16.789	12	1.40024	1.0929
300088	2011	1.94591	1	21.1253	1.79176	C	1.60944	1.79176	0.11313	0	2.3792	-0.433292	C	220.922	141	1.56411	0
300093	2011	2.48491	2.5	20.7741	2.89037	C	2.94444	1.09861	0.11313	1	2.3792	0.105705	C	220.922	141	1.56026	0.322061
300111	2011	0	6.5	21.9901	1.94591	C	2.30259	2.19722	0.11313	0	2.3792	-2.3792	C	220.922	141	1.57801	0.27933
300112	2011	3.55535	1	19.9799	2.89037	C	2.89037	0	0.11313	1	2.3792	1.17615	C	220.922	141	1.55262	0.952381
300118	2011	1.60944	2	22.1528	1.09861	C	3.4012	1.38629	0.11313	1	2.3792	-0.769764	C	220.922	141	1.56652	0.92081
300128	2011	1.60944	1	21.1845	2.07944	C	2.89037	0.693147	0.11313	1	2.3792	-0.769764	C	220.922	141	1.56652	0.21692
300134	2011	4.57471	2	21.719	2.3979	G	0	4.27667	0.11313	1	2.37902	2.19569	G	78.9993	24	3.23585	0
300138	2011	2.63906	1	20.8329	2.48491	C	0	0	0.11313	1	2.3792	0.259856	C	220.922	141	1.55916	0
300151	2011	1.09861	1	20.5109	2.3979	C	3.3322	0.693147	0.11313	1	2.3792	-1.28059	C	220.922	141	1.57017	0.662252
300153	2011	2.48491	2	20.867	2.30259	C	2.77259	1.94591	0.11313	0	2.3792	0.105705	C	220.922	141	1.56026	0.305344
300157	2011	1.94591	2	21.2248	1.09861	B	1.38629	0	0.11313	1	2.36209	-0.416182	B	16.789	12	1.34937	0.571429
300170	2011	3.80666	2	20.8393	2.30259	G	0	0.693147	0.11313	0	2.37902	1.42764	G	78.9993	24	3.26924	1.53374
300171	2011	1.94591	2	21.6469	2.94444	C	3.09104	2.19722	0.11313	1	2.3792	-0.433292	C	220.922	141	1.56411	0.462963
300184	2011	2.30259	1	20.003	2.3979	G	1.38629	0	0.11313	1	2.37902	-0.0764339	G	78.9993	24	3.33464	0.34965
600018	2011	2.07944	0.03125	25.1452	3.17805	F	2.19722	1.79176	0.11313	0	2.35517	-0.275724	F	4.47734	2	2.3979	0.469484
600019	2011	1.09861	0.166667	26.1661	2.48491	C	0	0	0.11313	0	2.3792	-1.28059	C	220.922	141	1.57017	0.4329
600028	2011	1.38629	0.0246914	27.7533	2.48491	B	0	0	0.11313	0	2.36209	-0.975798	B	16.789	12	1.40024	3.9604
600100	2011	4.48864	0.3125	24.1301	2.70805	G	4.55388	4.66344	0.11313	0	2.37902	2.10962	G	78.9993	24	3.23959	0
600104	2011	0	0.18	26.4873	2.70805	C	0	5.55683	0.11313	0	2.3792	-2.3792	C	220.922	141	1.57801	1.43885
600143	2011	3.04452	0.25	23.042	2.94444	C	2.07944	5.17615	0.11313	0	2.3792	0.665321	C	220.922	141	1.55627	2.6455
600151	2011	2.19722	4	23.0248	2.63906	C	0	3.3673	0.11313	0	2.3792	-0.181977	C	220.922	141	1.56232	0.662252
600152	2011	1.09861	0.00694444	21.9011	2.94444	C	3.73767	1.79176	0.11313	0	2.3792	-1.28059	C	220.922	141	1.57017	0
600166	2011	2.94444	1.125	24.0598	2.77259	C	0	0	0.11313	0	2.3792	0.565237	C	220.922	141	1.55698	1.87793
600171	2011	2.99573	0.015625	21.4163	2.63906	C	3.21888	3.2581	0.11313	0	2.3792	0.61653	C	220.922	141	1.55662	0.8
600176	2011	1.09861	0.90625	23.4926	2.56495	C	3.2581	3.13549	0.11313	0	2.3792	-1.28059	C	220.922	141	1.57017	0.729927
600188	2011	1.09861	0.173469	25.3032	2.70805	B	0	0	0.11313	0	2.36209	-1.26348	B	16.789	12	1.4264	0.481928
600196	2011	1.38629	0.0510204	23.8274	2.89037	C	0	0	0.11313	0	2.3792	-0.992907	C	220.922	141	1.56811	0.393701
600226	2011	1.38629	0.06	21.5609	2.56495	C	0	0	0.11313	1	2.3792	-0.992907	C	220.922	141	1.56811	0.729927
600249	2011	0.693147	0.111111	21.8799	2.89037	C	0	1.79176	0.11313	0	2.3792	-1.68605	C	220.922	141	1.57306	0
600261	2011	1.38629	0.0703125	21.8749	2.70805	C	0	3.09104	0.11313	0	2.3792	-0.992907	C	220.922	141	1.56811	1.23457
600276	2011	0	0.04	22.2956	2.70805	C	0	0	0.11313	0	2.3792	-2.3792	C	220.922	141	1.57801	1.16279
600308	2011	0.693147	1	23.5931	2.94444	C	1.60944	1.79176	0.11313	0	2.3792	-1.68605	C	220.922	141	1.57306	2.18978
600315	2011	1.38629	0.0246914	21.6581	2.83321	C	0	2.56495	0.11313	0	2.3792	-0.992907	C	220.922	141	1.56811	0
600320	2011	1.94591	0.0123457	24.5088	2.99573	C	5.14749	4.86753	0.11313	0	2.3792	-0.433292	C	220.922	141	1.56411	2.20264
600362	2011	1.09861	0.0416667	24.945	2.70805	C	0	0	0.11313	1	2.3792	-1.28059	C	220.922	141	1.57017	0
600363	2011	2.30259	0.0204082	21.3716	2.56495	C	0	1.09861	0.11313	0	2.3792	-0.0766167	C	220.922	141	1.56157	1.19048
600388	2011	1.38629	2	22.5112	2.63906	C	0	1.60944	0.11313	0	2.3792	-0.992907	C	220.922	141	1.56811	0.694444
600429	2011	1.60944	0.015625	21.9636	2.70805	C	0	3.29584	0.11313	0	2.3792	-0.769764	C	220.922	141	1.56652	1.14943
600439	2011	1.09861	0.15625	22.0202	2.56495	C	0	0	0.11313	0	2.3792	-1.28059	C	220.922	141	1.57017	0.769231
600460	2011	1.09861	0.0612245	21.9225	2.70805	C	0	0	0.11313	0	2.3792	-1.28059	C	220.922	141	1.57017	1.10497
600488	2011	0.693147	0.12	21.6057	2.56495	C	0	2.19722	0.11313	0	2.3792	-1.68605	C	220.922	141	1.57306	0
600496	2011	1.60944	0.40625	22.434	2.56495	E	0	0	0.11313	0	2.3557	-0.746264	E	12.9629	6	2.27069	2.68456
600497	2011	2.3979	0.222222	23.4508	2.48491	B	0	0	0.11313	0	2.36209	0.0358032	B	16.789	12	1.30828	1.8018
600525	2011	1.38629	0.037037	22.0058	3.2581	C	0	0	0.11313	1	2.3792	-0.992907	C	220.922	141	1.56811	2.15054
600526	2011	0.693147	1	21.5762	2.48491	C	2.70805	1.09861	0.11313	0	2.3792	-1.68605	C	220.922	141	1.57306	2.08333
600535	2011	0	0.04	22.6155	2.63906	C	0	0	0.11313	0	2.3792	-2.3792	C	220.922	141	1.57801	1.75439
600536	2011	4.29046	0.0204082	21.9907	2.48491	G	0.693147	3.55535	0.11313	0	2.37902	1.91144	G	78.9993	24	3.24821	0.840336
600557	2011	1.94591	0.08	21.6716	2.77259	C	0	3.13549	0.11313	1	2.3792	-0.433292	C	220.922	141	1.56411	1.06383
600580	2011	1.38629	0.5	22.2971	2.63906	C	0	3.29584	0.11313	0	2.3792	-0.992907	C	220.922	141	1.56811	1.60428
600584	2011	0	0.0277778	22.5178	2.48491	C	0	0	0.11313	0	2.3792	-2.3792	C	220.922	141	1.57801	0
600596	2011	0	0.2	22.6735	2.94444	C	0	2.77259	0.11313	0	2.3792	-2.3792	C	220.922	141	1.57801	0
600660	2011	0.693147	0.0625	23.2257	2.99573	C	0	2.07944	0.11313	0	2.3792	-1.68605	C	220.922	141	1.57306	2.16216
600685	2011	1.94591	0.0234375	23.1986	2.94444	C	0	0	0.11313	0	2.3792	-0.433292	C	220.922	141	1.56411	1.21951
600718	2011	3.66356	0.0826446	22.7933	3.04452	G	0	0	0.11313	1	2.37902	1.28454	G	78.9993	24	3.27546	0
600728	2011	4.07754	0.00826446	20.4291	2.94444	G	0	0	0.11313	0	2.37902	1.69852	G	78.9993	24	3.25747	0.735294
600764	2011	1.94591	0.0416667	21.0112	2.94444	G	2.3979	1.38629	0.11313	1	2.37902	-0.433109	G	78.9993	24	3.35015	0
600796	2011	0	0.111111	20.9153	2.94444	C	0	0	0.11313	1	2.3792	-2.3792	C	220.922	141	1.57801	0.657895
600819	2011	0.693147	0.0306122	22.6037	2.94444	C	0	0	0.11313	0	2.3792	-1.68605	C	220.922	141	1.57306	0
600820	2011	0.693147	0.02	23.8408	2.94444	E	0	0	0.11313	0	2.3557	-1.66255	E	12.9629	6	2.45395	0
600839	2011	2.48491	0.0740741	24.6678	2.94444	C	0	0	0.11313	0	2.3792	0.105705	C	220.922	141	1.56026	0
600845	2011	3.3322	0.015625	21.7625	2.89037	G	0	3.63759	0.11313	0	2.37902	0.953186	G	78.9993	24	3.28987	2.5974
600961	2011	0	0.0306122	22.5911	2.94444	C	0	0	0.11313	0	2.3792	-2.3792	C	220.922	141	1.57801	2.94118
600997	2011	1.09861	0.5	23.6898	2.3979	B	0	0	0.11313	0	2.36209	-1.26348	B	16.789	12	1.4264	1.94805
601117	2011	2.30259	0.5	24.5444	1.38629	K	3.80666	3.21888	0.11313	0	2.37019	-0.0676093	K	5.29832	2	2.99573	2.98507
601168	2011	1.38629	0.21875	24.0009	2.48491	B	0	0	0.11313	1	2.36209	-0.975798	B	16.789	12	1.40024	0
601177	2011	0.693147	2	22.0105	2.70805	C	0	0	0.11313	0	2.3792	-1.68605	C	220.922	141	1.57306	1.52672
601618	2011	3.04452	1.375	26.5285	1.38629	E	0	6.91175	0.11313	0	2.3557	0.688821	E	12.9629	6	1.98368	1.93705
601668	2011	2.30259	0.5	26.9495	1.60944	E	0	0	0.11313	0	2.3557	-0.0531166	E	12.9629	6	2.13206	1.05708
601777	2011	5.38629	8	23.1018	2.70805	C	0	10.1497	0.11313	0	2.3792	3.90291	C	220.922	141	1.56811	1.05263
601808	2011	1.09861	0.625	24.8977	2.30259	B	0	0	0.11313	0	2.36209	-1.26348	B	16.789	12	1.4264	0
601877	2011	1.79176	5.5	22.8464	2.70805	C	0	0	0.11313	0	2.3792	-0.587442	C	220.922	141	1.56522	0.671141
601899	2011	0	1	24.6806	2.48491	B	1.94591	2.07944	0.11313	0	2.36209	-2.36209	B	16.789	12	1.52627	1.22951
601919	2011	2.3979	1.09375	25.7823	1.94591	F	0	1.09861	0.11313	1	2.35517	0.04273	F	4.47734	2	2.07944	0.283286
601958	2011	1.94591	0.0625	23.4219	1.60944	B	0	0	0.11313	0	2.36209	-0.416182	B	16.789	12	1.34937	2.17391
601992	2011	1.09861	1	25.0659	1.94591	C	0	3.17805	0.11313	0	2.3792	-1.28059	C	220.922	141	1.57017	1.68067
21	2012	1.60944	0.00591716	23.0438	2.99573	C	0	2.19722	0.02202	0	2.3792	-0.769764	C	391.198	222	1.76285	1.16279
26	2012	0.693147	0.14	21.9253	3.2581	F	2.56495	2.30259	0.056944	0	2.35517	-1.66202	F	8.57395	6	1.57616	0
32	2012	2.19722	0.00591716	21.2492	2.99573	C	0	0	0.106013	0	2.3792	-0.181977	C	391.198	222	1.76019	1.5873
39	2012	1.79176	0.192308	24.8663	3.04452	C	0	4.7185	0.106013	0	2.3792	-0.587442	C	391.198	222	1.76202	1.93548
45	2012	1.09861	0.00591716	21.3549	3.43399	F	0	0	0.106013	0	2.35517	-1.25655	F	8.57395	6	1.49507	0
49	2012	1.79176	0.111111	21.3445	2.89037	C	4.52179	3.73767	0.106013	0	2.3792	-0.587442	C	391.198	222	1.76202	1.03093
55	2012	2.19722	0.00826446	21.5682	2.94444	C	0	4.5326	0.106013	1	2.3792	-0.181977	C	391.198	222	1.76019	0
63	2012	3.63759	0.00591716	25.4003	2.77259	C	0	0	0.106013	0	2.3792	1.25838	C	391.198	222	1.75367	3.52113
78	2012	1.94591	0.08	22.492	3.04452	F	0	0	0.106013	0	2.35517	-0.409255	F	8.57395	6	1.32561	2.5641
90	2012	3.29584	0.00694444	22.8725	2.99573	E	1.94591	0.693147	0.106013	0	2.3557	0.940135	E	15.1326	12	1.07607	0
100	2012	2.56495	0.771605	25.1021	2.3979	C	0	0	0.02202	1	2.3792	0.185748	C	391.198	222	1.75852	1.2987
157	2012	1.09861	0.07	25.2116	2.63906	C	0	0	0.02202	1	2.3792	-1.28059	C	391.198	222	1.76516	0.806452
158	2012	1.60944	0.25	22.4667	2.70805	C	0	0	0.02202	0	2.3792	-0.769764	C	391.198	222	1.76285	4.16667
425	2012	2.19722	1	24.5379	2.99573	C	0	0	0.106013	1	2.3792	-0.181977	C	391.198	222	1.76019	3.2967
521	2012	2.3979	1	22.7884	3.04452	C	0	3.63759	0.106013	0	2.3792	0.0186935	C	391.198	222	1.75928	0.689655
528	2012	0.693147	0.179688	23.8405	2.99573	C	0	0	0.106013	0	2.3792	-1.68605	C	391.198	222	1.76699	2.75229
589	2012	1.60944	0.25	22.6306	2.83321	C	0	1.79176	0.106013	0	2.3792	-0.769764	C	391.198	222	1.76285	0
607	2012	2.07944	0.0289256	21.424	2.99573	C	0	2.83321	0.106013	0	2.3792	-0.29976	C	391.198	222	1.76072	0
636	2012	2.19722	0.1875	21.9108	2.94444	C	0	0	0.106013	0	2.3792	-0.181977	C	391.198	222	1.76019	0
651	2012	1.79176	0.0207101	25.4014	3.17805	C	0	2.99573	0.106013	1	2.3792	-0.587442	C	391.198	222	1.76202	2.53165
680	2012	1.38629	7	23.3115	2.99573	C	5.5835	1.79176	0.106013	0	2.3792	-0.992907	C	391.198	222	1.76386	3.26087
701	2012	3.04452	0.0123457	22.4124	3.04452	F	2.48491	0.693147	0.106013	0	2.35517	0.689357	F	8.57395	6	1.10589	1.63934
709	2012	1.09861	0.0204082	25.7653	2.94444	C	0	0	0.106013	0	2.3792	-1.28059	C	391.198	222	1.76516	0
726	2012	1.38629	0.01	22.8217	2.99573	C	3.17805	1.60944	0.106013	0	2.3792	-0.992907	C	391.198	222	1.76386	1.80723
731	2012	1.09861	0.0625	22.217	2.94444	C	0	0	0.106013	0	2.3792	-1.28059	C	391.198	222	1.76516	0.775194
756	2012	1.38629	0.0123457	22.012	2.99573	C	1.38629	2.07944	0.106013	0	2.3792	-0.992907	C	391.198	222	1.76386	0
812	2012	1.38629	0.00826446	21.0404	2.70805	C	1.09861	0	0.106013	1	2.3792	-0.992907	C	391.198	222	1.76386	2.77778
821	2012	0	0.222222	21.1024	2.99573	C	4.11087	2.3979	0.106013	0	2.3792	-2.3792	C	391.198	222	1.77013	1.5625
837	2012	1.38629	0.0234375	21.4678	2.70805	C	0	1.94591	0.106013	0	2.3792	-0.992907	C	391.198	222	1.76386	0
887	2012	0	0.25	22.086	2.70805	C	0	2.89037	0.106013	0	2.3792	-2.3792	C	391.198	222	1.77013	1.20482
919	2012	0	0.111111	21.8861	2.70805	C	0	2.19722	0.106013	0	2.3792	-2.3792	C	391.198	222	1.77013	2.77778
930	2012	1.09861	0.0413223	22.6488	2.70805	C	0	0	0.106013	0	2.3792	-1.28059	C	391.198	222	1.76516	3.0303
999	2012	1.79176	0.0165289	22.8765	2.63906	C	0	3.09104	0.106013	0	2.3792	-0.587442	C	391.198	222	1.76202	2.23881
2003	2012	1.79176	1	21.5953	2.56495	C	3.63759	1.09861	0.02202	0	2.3792	-0.587442	C	391.198	222	1.76202	0
2008	2012	2.3979	0.125	22.6002	2.48491	C	0	0	0.02202	1	2.3792	0.0186935	C	391.198	222	1.75928	0.537634
2011	2012	1.79176	0.1	23.0368	2.48491	C	0	4.64439	0.02202	0	2.3792	-0.587442	C	391.198	222	1.76202	1.04167
2028	2012	2.07944	2	22.1918	2.56495	C	3.97029	3.21888	0.02202	0	2.3792	-0.29976	C	391.198	222	1.76072	0.819672
2030	2012	2.3979	0.111111	20.6315	2.48491	C	0	2.99573	0.02202	0	2.3792	0.0186935	C	391.198	222	1.75928	0
2031	2012	1.60944	4	21.7149	2.48491	C	1.94591	0	0.02202	0	2.3792	-0.769764	C	391.198	222	1.76285	0.598802
2042	2012	1.09861	0.166667	22.8038	2.56495	C	2.19722	3.13549	0.02202	0	2.3792	-1.28059	C	391.198	222	1.76516	0.684932
2043	2012	2.63906	1	20.6685	2.48491	C	1.60944	2.30259	0.02202	0	2.3792	0.259856	C	391.198	222	1.75819	2.17391
2045	2012	1.79176	0.0816327	21.6093	2.99573	C	3.8712	0.693147	0.02202	1	2.3792	-0.587442	C	391.198	222	1.76202	1.16279
2055	2012	1.38629	0.0555556	21.5843	2.3979	C	3.71357	1.09861	0.02202	1	2.3792	-0.992907	C	391.198	222	1.76386	0
2056	2012	2.48491	3	22.1662	2.63906	C	5.22575	4.17439	0.02202	1	2.3792	0.105705	C	391.198	222	1.75888	0
2062	2012	0.693147	0.0625	23.1521	2.94444	E	3.3322	1.38629	0.02202	0	2.3557	-1.66255	E	15.1326	12	1.31268	6.66667
2067	2012	0	0.04	22.3736	2.48491	C	1.94591	1.09861	0.02202	0	2.3792	-2.3792	C	391.198	222	1.77013	1.2
2069	2012	2.3979	0.3125	22.3169	2.48491	A	0	2.3979	0.02202	1	2.38807	0.00982365	A	2.3979	2	6.33528e-08	0.613497
2078	2012	2.3979	0.1875	23.4428	2.56495	C	0	0	0.02202	1	2.3792	0.0186935	C	391.198	222	1.75928	0.540541
2079	2012	2.77259	0.222222	21.1123	3.13549	C	0	0	0.02202	1	2.3792	0.393387	C	391.198	222	1.75758	1.61943
2083	2012	1.60944	0.0416667	22.6586	2.3979	C	0	0	0.02202	0	2.3792	-0.769764	C	391.198	222	1.76285	5.26316
2084	2012	2.77259	0.0555556	21.2363	2.30259	C	3.3673	2.30259	0.02202	0	2.3792	0.393387	C	391.198	222	1.75758	1.06383
2085	2012	1.38629	0.0555556	21.8318	2.48491	C	0	0	0.02202	0	2.3792	-0.992907	C	391.198	222	1.76386	2.35294
2086	2012	0	0.25	21.5741	2.48491	A	0	0	0.02202	0	2.38807	-2.38807	A	2.3979	2	2.3979	0.581395
2090	2012	3.58352	3.5	20.905	2.89037	C	0	2.3979	0.02202	0	2.3792	1.20432	C	391.198	222	1.75391	0.865801
2091	2012	1.09861	0.04	21.4185	2.70805	F	0.693147	3.3673	0.02202	0	2.35517	-1.25655	F	8.57395	6	1.49507	0.917431
2094	2012	0	0.0555556	20.8348	2.77259	C	4.66344	0.693147	0.02202	0	2.3792	-2.3792	C	391.198	222	1.77013	0.826446
2099	2012	1.38629	2	21.3746	2.19722	C	0	0	0.02202	0	2.3792	-0.992907	C	391.198	222	1.76386	0
2103	2012	0.693147	0.0694444	20.8826	2.48491	C	1.79176	2.19722	0.02202	0	2.3792	-1.68605	C	391.198	222	1.76699	0.653595
2104	2012	0	2	20.7978	2.83321	C	0	0	0.02202	1	2.3792	-2.3792	C	391.198	222	1.77013	0.869565
2111	2012	2.07944	0.111111	21.3221	2.3979	C	0	1.94591	0.02202	0	2.3792	-0.29976	C	391.198	222	1.76072	1.05634
2115	2012	3.3673	0.09375	21.3953	2.19722	C	4.18965	2.70805	0.02202	0	2.3792	0.988094	C	391.198	222	1.75489	0
2120	2012	1.09861	0.21875	20.5808	2.83321	C	3.91202	1.60944	0.02202	0	2.3792	-1.28059	C	391.198	222	1.76516	0
2126	2012	0.693147	0.222222	21.6313	2.63906	C	2.48491	1.94591	0.02202	0	2.3792	-1.68605	C	391.198	222	1.76699	0
2130	2012	1.09861	0.0625	21.3238	2.70805	C	0	0	0.02202	0	2.3792	-1.28059	C	391.198	222	1.76516	2.08333
2137	2012	2.07944	0.04	20.6	2.70805	C	0	0	0.02202	0	2.3792	-0.29976	C	391.198	222	1.76072	1.25786
2152	2012	2.48491	0.28125	22.1147	2.63906	C	3.55535	4.14313	0.02202	0	2.3792	0.105705	C	391.198	222	1.75888	0.534759
2156	2012	2.63906	0.04	21.9419	2.94444	C	0	0	0.02202	0	2.3792	0.259856	C	391.198	222	1.75819	0
2165	2012	1.94591	0.04	21.2895	2.94444	C	0	2.07944	0.02202	0	2.3792	-0.433292	C	391.198	222	1.76132	2.7027
2166	2012	1.38629	1	20.6269	2.56495	C	0	0	0.02202	1	2.3792	-0.992907	C	391.198	222	1.76386	1.7094
2167	2012	0	0.375	21.836	2.89037	C	0	0	0.02202	1	2.3792	-2.3792	C	391.198	222	1.77013	0
2177	2012	2.3979	2	21.2829	2.48491	C	2.56495	1.09861	0.02202	1	2.3792	0.0186935	C	391.198	222	1.75928	1.88679
2188	2012	1.09861	0.0625	19.7225	1.94591	C	1.60944	0.693147	0.02202	0	2.3792	-1.28059	C	391.198	222	1.76516	1.03093
2191	2012	1.09861	0.1	22.1853	2.83321	C	3.3673	3.09104	0.02202	0	2.3792	-1.28059	C	391.198	222	1.76516	0.571429
2194	2012	2.3979	0.111111	21.521	3.17805	C	4.47734	1.60944	0.02202	0	2.3792	0.0186935	C	391.198	222	1.75928	1.84049
2206	2012	1.09861	0.111111	21.8494	2.48491	C	0	0	0.02202	0	2.3792	-1.28059	C	391.198	222	1.76516	0.921659
2218	2012	2.19722	0.08	21.5579	1.79176	C	3.93183	1.60944	0.02202	0	2.3792	-0.181977	C	391.198	222	1.76019	1.77515
2227	2012	2.07944	0.0625	20.4248	2.70805	C	0.693147	1.94591	0.02202	1	2.3792	-0.29976	C	391.198	222	1.76072	1.81818
2236	2012	2.63906	1	21.9463	2.3979	C	0	0	0.02202	1	2.3792	0.259856	C	391.198	222	1.75819	1.06952
2241	2012	2.30259	0.375	22.9629	2.48491	C	0	5.1985	0.02202	1	2.3792	-0.0766167	C	391.198	222	1.75971	1.34228
2243	2012	2.07944	0.0625	21.0517	1.79176	C	0	0	0.02202	0	2.3792	-0.29976	C	391.198	222	1.76072	0.323625
2249	2012	2.30259	0.15625	22.0226	1.94591	C	6.15273	2.77259	0.02202	0	2.3792	-0.0766167	C	391.198	222	1.75971	2.07469
2255	2012	0.693147	0.25	21.6505	2.56495	C	0	1.79176	0.02202	1	2.3792	-1.68605	C	391.198	222	1.76699	0.884956
2266	2012	1.38629	1	21.64	2.19722	C	2.83321	1.60944	0.02202	0	2.3792	-0.992907	C	391.198	222	1.76386	1.48148
2278	2012	2.19722	0.222222	21.1649	2.99573	C	5.42495	4.34381	0.02202	0	2.3792	-0.181977	C	391.198	222	1.76019	1.92308
2282	2012	2.30259	0.5	20.906	2.70805	C	2.77259	1.09861	0.02202	0	2.3792	-0.0766167	C	391.198	222	1.75971	0.4329
2294	2012	1.09861	0.25	21.8154	2.70805	C	0	1.79176	0.02202	0	2.3792	-1.28059	C	391.198	222	1.76516	0.526316
2295	2012	1.09861	0.25	20.9281	2.07944	C	1.94591	0.693147	0.02202	0	2.3792	-1.28059	C	391.198	222	1.76516	2.14286
2303	2012	2.3979	0.222222	21.495	1.79176	C	4.04305	2.70805	0.02202	1	2.3792	0.0186935	C	391.198	222	1.75928	0
2314	2012	1.38629	0.25	22.132	2.48491	E	4.21951	1.94591	0.02202	0	2.3557	-0.969407	E	15.1326	12	1.24966	2.0202
2318	2012	2.19722	0.111111	21.7384	2.19722	C	0	0.693147	0.02202	0	2.3792	-0.181977	C	391.198	222	1.76019	0
2328	2012	1.09861	0.5	21.8197	2.77259	C	0	0	0.02202	0	2.3792	-1.28059	C	391.198	222	1.76516	0.617284
2332	2012	1.38629	1	21.6165	2.56495	C	0	1.60944	0.02202	0	2.3792	-0.992907	C	391.198	222	1.76386	3.33333
2334	2012	3.2581	0.25	21.0445	1.94591	C	0	1.94591	0.02202	1	2.3792	0.878895	C	391.198	222	1.75539	1.14943
2337	2012	2.48491	1.5	21.238	2.56495	C	2.48491	2.3979	0.02202	0	2.3792	0.105705	C	391.198	222	1.75888	0
2340	2012	2.3979	0.25	22.5718	1.94591	C	0	0	0.02202	1	2.3792	0.0186935	C	391.198	222	1.75928	1.04167
2342	2012	2.94444	2	22.1405	2.19722	C	4.83628	1.79176	0.02202	0	2.3792	0.565237	C	391.198	222	1.7568	2.39521
2348	2012	0.693147	0.111111	20.8976	3.17805	C	4.55388	0.693147	0.02202	1	2.3792	-1.68605	C	391.198	222	1.76699	0.549451
2351	2012	0	0.444444	21.2779	2.48491	C	2.89037	0	0.02202	1	2.3792	-2.3792	C	391.198	222	1.77013	0.621118
2353	2012	1.09861	0.111111	22.2674	2.63906	C	0	0	0.02202	0	2.3792	-1.28059	C	391.198	222	1.76516	0.996678
2356	2012	2.99573	1	21.0727	2.94444	C	0	0	0.02202	0	2.3792	0.61653	C	391.198	222	1.75657	2.39234
2369	2012	1.09861	0.25	21.3758	2.19722	C	0	0	0.02202	0	2.3792	-1.28059	C	391.198	222	1.76516	0.694444
2371	2012	1.60944	0.25	21.9987	2.48491	C	0	3.13549	0.02202	0	2.3792	-0.769764	C	391.198	222	1.76285	0.492611
2376	2012	2.30259	0.375	21.2578	2.3979	C	0	3.68888	0.02202	0	2.3792	-0.0766167	C	391.198	222	1.75971	0
2394	2012	1.60944	4	22.0604	2.3979	C	4.2485	2.19722	0.02202	1	2.3792	-0.769764	C	391.198	222	1.76285	1.78571
2396	2012	3.91202	1	21.851	2.83321	C	0	5.69036	0.02202	0	2.3792	1.53282	C	391.198	222	1.75243	0
2397	2012	2.19722	1	21.1987	2.07944	C	0	0	0.02202	1	2.3792	-0.181977	C	391.198	222	1.76019	0
2399	2012	2.70805	1	22.8347	2.70805	C	0	1.38629	0.02202	0	2.3792	0.328848	C	391.198	222	1.75787	0
2402	2012	5.4848	1	20.6637	1.79176	C	5.51745	5.3845	0.02202	1	2.3792	3.1056	C	391.198	222	1.74531	0
2405	2012	2.89037	2.5	21.7563	1.60944	I	0	0	0.02202	0	2.38211	0.508258	I	44.3173	13	3.45224	0.694444
2409	2012	1.38629	0.75	20.9933	2.77259	C	0	2.30259	0.02202	1	2.3792	-0.992907	C	391.198	222	1.76386	1.08696
2410	2012	2.77259	0.5	21.5449	1.79176	I	0	0	0.02202	0	2.38211	0.390475	I	44.3173	13	3.46206	0.666667
2414	2012	0.693147	1	21.6047	2.19722	C	2.19722	1.60944	0.02202	1	2.3792	-1.68605	C	391.198	222	1.76699	1.73913
2420	2012	2.56495	1	21.8709	2.77259	C	3.61092	0.693147	0.02202	0	2.3792	0.185748	C	391.198	222	1.75852	0.478469
2426	2012	0.693147	0.625	21.4369	1.60944	C	0	0	0.02202	0	2.3792	-1.68605	C	391.198	222	1.76699	0
2430	2012	3.17805	0.25	22.8337	2.3979	C	0	0	0.02202	0	2.3792	0.798852	C	391.198	222	1.75575	0
2431	2012	1.09861	1	22.3306	1.60944	E	0.693147	1.38629	0.02202	0	2.3557	-1.25709	E	15.1326	12	1.27582	0.641026
2432	2012	1.94591	2.5	20.523	2.89037	C	4.70048	1.60944	0.02202	0	2.3792	-0.433292	C	391.198	222	1.76132	0
2440	2012	3.2581	0.375	22.381	2.19722	C	0	2.63906	0.02202	0	2.3792	0.878895	C	391.198	222	1.75539	1.65746
2459	2012	1.09861	3	21.5788	1.60944	C	3.52636	2.83321	0.02202	0	2.3792	-1.28059	C	391.198	222	1.76516	2.15827
2460	2012	2.19722	1	20.7701	2.56495	C	2.07944	1.79176	0.02202	1	2.3792	-0.181977	C	391.198	222	1.76019	2.01342
2463	2012	1.94591	1	22.2677	3.04452	C	1.09861	0.693147	0.02202	0	2.3792	-0.433292	C	391.198	222	1.76132	0.819672
2468	2012	2.30259	1.5	21.0737	2.48491	C	0	2.19722	0.02202	0	2.3792	-0.0766167	C	391.198	222	1.75971	1.8018
2470	2012	0.693147	0.25	22.6411	2.70805	C	0	3.29584	0.02202	1	2.3792	-1.68605	C	391.198	222	1.76699	1.1236
2486	2012	1.79176	2	20.8258	2.48491	C	0	2.19722	0.02202	1	2.3792	-0.587442	C	391.198	222	1.76202	0.900901
2493	2012	1.09861	0.375	23.8895	1.79176	C	0	0	0.02202	0	2.3792	-1.28059	C	391.198	222	1.76516	0.714286
2514	2012	1.60944	0.25	20.1832	2.48491	C	2.89037	1.79176	0.02202	0	2.3792	-0.769764	C	391.198	222	1.76285	0.584795
2518	2012	2.77259	0.25	21.2244	2.99573	C	2.07944	0.693147	0.02202	1	2.3792	0.393387	C	391.198	222	1.75758	0.934579
2527	2012	2.70805	2	21.2104	2.89037	C	0	3.3322	0.104056	0	2.3792	0.328848	C	391.198	222	1.75787	1.2987
2531	2012	0.693147	3	21.5703	2.07944	C	0	0	0.104056	1	2.3792	-1.68605	C	391.198	222	1.76699	3.64964
2543	2012	1.94591	1	21.8631	2.30259	C	6.54535	3.3673	0.104056	0	2.3792	-0.433292	C	391.198	222	1.76132	0.462963
2544	2012	4.30407	2	21.3082	2.94444	I	0	5.53339	0.104056	0	2.38211	1.92195	I	44.3173	13	3.33444	1.08108
2554	2012	1.38629	0.5	21.1763	2.70805	B	1.94591	1.09861	0.056944	1	2.36209	-0.975798	B	13.7343	10	1.372	1.85185
2565	2012	1.79176	1	21.6387	2.19722	C	0	1.38629	0.056944	1	2.3792	-0.587442	C	391.198	222	1.76202	0
2577	2012	1.60944	1	21.1429	2.3979	C	3.3673	2.56495	0.056944	1	2.3792	-0.769764	C	391.198	222	1.76285	0
2579	2012	2.07944	1	20.464	2.56495	C	0	0.693147	0.056944	0	2.3792	-0.29976	C	391.198	222	1.76072	2.94118
2583	2012	2.70805	5	21.6582	2.99573	C	3.58352	3.97029	0.056944	1	2.3792	0.328848	C	391.198	222	1.75787	0.444444
2593	2012	1.38629	1	21.5224	2.89037	C	3.29584	0	0.056944	1	2.3792	-0.992907	C	391.198	222	1.76386	3.10559
2598	2012	0	1	20.6602	1.94591	C	0.693147	1.09861	0.056944	0	2.3792	-2.3792	C	391.198	222	1.77013	0
2600	2012	1.38629	1	21.2787	1.60944	C	2.77259	1.38629	0.056944	1	2.3792	-0.992907	C	391.198	222	1.76386	0
2603	2012	2.19722	1	22.1502	2.48491	C	1.09861	4.15888	0.056944	0	2.3792	-0.181977	C	391.198	222	1.76019	2.6178
2614	2012	1.94591	3	21.7086	2.83321	C	3.2581	1.60944	0.056944	1	2.3792	-0.433292	C	391.198	222	1.76132	1.19048
2638	2012	0.693147	1	21.8188	2.94444	C	4.68213	2.56495	0.056944	1	2.3792	-1.68605	C	391.198	222	1.76699	0
2642	2012	4.31749	1	20.8949	2.48491	I	0	0	0.056944	0	2.38211	1.93537	I	44.3173	13	3.33332	1.21212
2649	2012	2.07944	5.5	21.0217	2.89037	I	0	0	0.056944	0	2.38211	-0.302672	I	44.3173	13	3.51982	0.574713
2654	2012	2.48491	1	20.2955	2.3979	C	1.94591	0	0.056944	0	2.3792	0.105705	C	391.198	222	1.75888	3.68098
2655	2012	3.21888	1	20.5758	2.48491	C	3.09104	2.83321	0.056944	0	2.3792	0.839674	C	391.198	222	1.75556	1.63934
300043	2012	1.94591	0.166667	21.1546	2.56495	C	2.63906	0	0.106013	1	2.3792	-0.433292	C	391.198	222	1.76132	0.793651
300045	2012	2.70805	0.166667	20.5267	1.60944	C	0	1.09861	0.106013	1	2.3792	0.328848	C	391.198	222	1.75787	1.1236
300050	2012	2.63906	0.222222	21.2253	2.48491	I	0	0	0.106013	1	2.38211	0.256944	I	44.3173	13	3.47319	0
300051	2012	3.21888	0.111111	20.1991	2.19722	I	0	1.09861	0.106013	1	2.38211	0.836762	I	44.3173	13	3.42487	0.363636
300053	2012	2.30259	0.111111	20.26	2.56495	C	1.94591	0.693147	0.106013	1	2.3792	-0.0766167	C	391.198	222	1.75971	0
300061	2012	1.38629	0.5	20.2912	2.83321	C	0	0	0.106013	1	2.3792	-0.992907	C	391.198	222	1.76386	0
300065	2012	3.3673	0.375	20.4075	2.48491	C	0	0	0.106013	0	2.3792	0.988094	C	391.198	222	1.75489	1.53061
300068	2012	2.48491	1	22.0858	2.77259	C	0	2.70805	0.106013	0	2.3792	0.105705	C	391.198	222	1.75888	0.334448
300077	2012	2.99573	5.5	21.7851	2.56495	C	0	0	0.106013	0	2.3792	0.61653	C	391.198	222	1.75657	0
300078	2012	2.89037	3	20.9215	2.30259	C	0	1.09861	0.106013	1	2.3792	0.51117	C	391.198	222	1.75705	0
300083	2012	1.94591	1	21.4474	2.30259	C	3.71357	3.46574	0.106013	0	2.3792	-0.433292	C	391.198	222	1.76132	0
300084	2012	0.693147	1.125	20.5243	2.56495	B	1.94591	0	0.106013	1	2.36209	-1.66894	B	13.7343	10	1.44902	1.06383
300088	2012	1.38629	0.25	21.301	1.94591	C	2.3979	1.94591	0.106013	0	2.3792	-0.992907	C	391.198	222	1.76386	0
300093	2012	1.79176	0.625	20.9006	2.94444	C	5.15329	2.19722	0.106013	1	2.3792	-0.587442	C	391.198	222	1.76202	2.01613
300111	2012	1.09861	2.125	21.8343	2.07944	C	2.19722	0.693147	0.106013	0	2.3792	-1.28059	C	391.198	222	1.76516	0.746269
300118	2012	1.09861	0.75	22.1146	1.38629	C	1.38629	1.79176	0.106013	1	2.3792	-1.28059	C	391.198	222	1.76516	0.858369
300123	2012	1.94591	2	21.0507	2.30259	C	0	0	0.106013	1	2.3792	-0.433292	C	391.198	222	1.76132	0
300124	2012	4.17439	3	21.813	2.30259	C	4.69135	2.48491	0.106013	1	2.3792	1.79519	C	391.198	222	1.75124	0.371747
300128	2012	1.38629	0.25	21.4041	2.19722	C	1.79176	1.38629	0.106013	1	2.3792	-0.992907	C	391.198	222	1.76386	0.3003
300129	2012	1.38629	1	21.3893	2.48491	C	1.94591	1.60944	0.106013	0	2.3792	-0.992907	C	391.198	222	1.76386	1.99203
300132	2012	1.09861	1	20.7103	2.48491	C	0	0	0.106013	0	2.3792	-1.28059	C	391.198	222	1.76516	0.552486
300138	2012	2.48491	0.25	21.0918	2.56495	C	0	0	0.106013	1	2.3792	0.105705	C	391.198	222	1.75888	0
300139	2012	0.693147	1.5	20.9323	2.56495	C	0	0	0.106013	1	2.3792	-1.68605	C	391.198	222	1.76699	1.70455
300151	2012	1.38629	0.25	20.5278	2.48491	C	2.30259	0	0.106013	1	2.3792	-0.992907	C	391.198	222	1.76386	0.420168
300153	2012	2.30259	0.5	20.7441	2.3979	C	2.77259	2.19722	0.106013	0	2.3792	-0.0766167	C	391.198	222	1.75971	0.711744
300157	2012	1.94591	1.25	21.5359	1.38629	B	0	2.19722	0.106013	1	2.36209	-0.416182	B	13.7343	10	1.30982	0.355872
300171	2012	1.38629	0.5	21.89	2.99573	C	3.29584	1.94591	0.106013	1	2.3792	-0.992907	C	391.198	222	1.76386	0
300177	2012	2.3979	1	20.6624	1.94591	C	1.38629	1.09861	0.106013	0	2.3792	0.0186935	C	391.198	222	1.75928	0
300191	2012	1.94591	1.5	20.8661	2.30259	B	0	1.09861	0.106013	1	2.36209	-0.416182	B	13.7343	10	1.30982	0.97561
300195	2012	1.60944	3	21.0702	2.89037	C	0	0	0.106013	1	2.3792	-0.769764	C	391.198	222	1.76285	0.833333
300206	2012	2.19722	4	20.9591	2.89037	C	0	3.13549	0.106013	1	2.3792	-0.181977	C	391.198	222	1.76019	0.558659
300207	2012	2.07944	1	21.4763	2.77259	C	0	0	0.106013	1	2.3792	-0.29976	C	391.198	222	1.76072	0
300219	2012	1.60944	1	20.6873	2.19722	C	0	2.3979	0.106013	1	2.3792	-0.769764	C	391.198	222	1.76285	0.729927
300221	2012	1.60944	1	20.6297	2.77259	C	0	1.38629	0.106013	0	2.3792	-0.769764	C	391.198	222	1.76285	0
300223	2012	3.17805	1	20.8289	2.07944	C	0.693147	2.56495	0.106013	1	2.3792	0.798852	C	391.198	222	1.75575	0
300230	2012	0.693147	2.5	20.2207	2.3979	C	2.07944	1.09861	0.106013	0	2.3792	-1.68605	C	391.198	222	1.76699	0
300238	2012	2.48491	1	20.1108	2.63906	C	0.693147	2.99573	0.106013	1	2.3792	0.105705	C	391.198	222	1.75888	0.704225
300252	2012	3.04452	2	20.9415	2.3979	C	3.17805	2.94444	0.106013	0	2.3792	0.665321	C	391.198	222	1.75635	0
300257	2012	1.38629	3.5	21.9419	2.3979	C	0	0	0.106013	0	2.3792	-0.992907	C	391.198	222	1.76386	0
300264	2012	2.48491	1	20.2714	2.56495	I	0	1.09861	0.106013	0	2.38211	0.102793	I	44.3173	13	3.48603	0.867052
300269	2012	2.63906	2	20.6372	2.30259	C	2.89037	0.693147	0.106013	1	2.3792	0.259856	C	391.198	222	1.75819	0.609756
300273	2012	2.19722	1	20.897	2.83321	C	3.09104	1.09861	0.106013	1	2.3792	-0.181977	C	391.198	222	1.76019	2.40385
300284	2012	2.3979	2	21.7827	2.3979	M	0	0	0.106013	0	2.37019	0.027701	M	3.49651	2	1.09861	3.2967
600019	2012	1.38629	0.163265	26.0909	2.56495	C	0	0	0.106013	0	2.3792	-0.992907	C	391.198	222	1.76386	0
600028	2012	1.94591	0.02	27.852	2.56495	B	0	0	0.106013	0	2.36209	-0.416182	B	13.7343	10	1.30982	3.15789
600031	2012	2.19722	0.265306	24.8893	2.56495	C	0	0	0.106013	0	2.3792	-0.181977	C	391.198	222	1.76019	2.34375
600096	2012	2.3979	1	24.0225	2.77259	C	2.19722	3.52636	0.106013	0	2.3792	0.0186935	C	391.198	222	1.75928	0.689655
600100	2012	4.41884	0.277778	24.2408	2.77259	C	4.54329	4.51086	0.106013	0	2.3792	2.03964	C	391.198	222	1.75013	0.779221
600141	2012	1.60944	0.75	23.348	2.94444	C	0	0	0.106013	0	2.3792	-0.769764	C	391.198	222	1.76285	0.478469
600143	2012	1.09861	0.222222	23.2643	2.99573	C	0	5.24175	0.106013	0	2.3792	-1.28059	C	391.198	222	1.76516	0.609756
600151	2012	2.48491	1.5	23.1343	2.70805	C	0	3.68888	0.106013	0	2.3792	0.105705	C	391.198	222	1.75888	1.85185
600152	2012	0.693147	0.00591716	21.7587	2.99573	C	1.60944	1.38629	0.106013	0	2.3792	-1.68605	C	391.198	222	1.76699	0
600166	2012	2.30259	0.888889	24.2213	2.83321	C	0	0	0.106013	0	2.3792	-0.0766167	C	391.198	222	1.75971	0.52356
600169	2012	2.19722	2	23.749	2.70805	C	0	0	0.106013	0	2.3792	-0.181977	C	391.198	222	1.76019	0.813008
600171	2012	2.70805	0.0123457	21.4509	2.70805	C	0	3.46574	0.106013	0	2.3792	0.328848	C	391.198	222	1.75787	0
600176	2012	1.09861	0.62	23.6417	2.63906	C	4.12713	2.99573	0.106013	0	2.3792	-1.28059	C	391.198	222	1.76516	2.5974
600177	2012	2.3979	0.0625	24.6325	2.99573	C	0	0	0.106013	0	2.3792	0.0186935	C	391.198	222	1.75928	0.763359
600216	2012	1.38629	0.04	22.6774	2.77259	C	0	3.2581	0.106013	0	2.3792	-0.992907	C	391.198	222	1.76386	0.806452
600226	2012	1.09861	0.0416667	21.5186	2.63906	C	0	0	0.106013	1	2.3792	-1.28059	C	391.198	222	1.76516	0
600249	2012	1.38629	0.0625	21.9005	2.94444	C	0	2.48491	0.106013	0	2.3792	-0.992907	C	391.198	222	1.76386	0.719424
600261	2012	1.60944	0.0555556	22.1321	2.77259	C	0	3.61092	0.106013	0	2.3792	-0.769764	C	391.198	222	1.76285	2.77778
600267	2012	0	0.111111	23.0812	2.70805	C	0	5.62402	0.106013	1	2.3792	-2.3792	C	391.198	222	1.77013	0
600276	2012	0.693147	0.0277778	22.4969	2.77259	C	0	0	0.106013	0	2.3792	-1.68605	C	391.198	222	1.76699	1.7094
600282	2012	1.79176	0.75	24.256	2.63906	C	0	5.46383	0.106013	0	2.3792	-0.587442	C	391.198	222	1.76202	0.549451
600315	2012	1.38629	0.02	22.0171	2.89037	C	0	2.70805	0.106013	0	2.3792	-0.992907	C	391.198	222	1.76386	1.63934
600336	2012	0.693147	0.0185185	21.785	2.70805	C	4.77912	2.19722	0.106013	0	2.3792	-1.68605	C	391.198	222	1.76699	0.877193
600363	2012	2.56495	0.015625	21.6341	2.63906	C	2.19722	1.38629	0.106013	0	2.3792	0.185748	C	391.198	222	1.75852	0
600410	2012	4.18965	0.03125	22.2397	3.21888	I	0	0	0.106013	0	2.38211	1.80754	I	44.3173	13	3.34397	0.757576
600439	2012	1.09861	0.123457	22.1698	2.63906	C	2.89037	1.38629	0.106013	0	2.3792	-1.28059	C	391.198	222	1.76516	0.952381
600458	2012	0.693147	1	22.1669	2.94444	C	4.09434	4.06044	0.106013	0	2.3792	-1.68605	C	391.198	222	1.76699	1.78571
600460	2012	1.79176	0.046875	21.9323	2.77259	C	0	0	0.106013	0	2.3792	-0.587442	C	391.198	222	1.76202	0.473934
600488	2012	1.94591	0.0833333	21.6363	2.63906	C	0	2.19722	0.106013	0	2.3792	-0.433292	C	391.198	222	1.76132	1.76211
600491	2012	0.693147	0.22	23.369	2.89037	E	0	0	0.106013	0	2.3557	-1.66255	E	15.1326	12	1.31268	1.76471
600496	2012	0	0.32	22.7252	2.63906	E	0	1.38629	0.106013	0	2.3557	-2.3557	E	15.1326	12	1.37569	0.826446
600497	2012	1.79176	0.1875	23.8242	2.56495	B	0	2.63906	0.106013	0	2.36209	-0.570333	B	13.7343	10	1.32695	2.58621
600499	2012	1.38629	0.04	22.3626	2.83321	C	4.57471	3.3673	0.106013	0	2.3792	-0.992907	C	391.198	222	1.76386	2.15054
600501	2012	0.693147	1	22.123	2.63906	C	0	2.77259	0.106013	0	2.3792	-1.68605	C	391.198	222	1.76699	2.30769
600510	2012	0	0.015625	23.1597	2.89037	K	1.09861	1.79176	0.106013	0	2.37019	-2.37019	K	0	1		2.5974
600525	2012	0.693147	0.03	22.1764	3.29584	C	5.11199	4.21951	0.106013	1	2.3792	-1.68605	C	391.198	222	1.76699	1.16279
600526	2012	0.693147	0.25	21.4766	2.56495	C	3.58352	2.07944	0.106013	0	2.3792	-1.68605	C	391.198	222	1.76699	2.94118
600535	2012	2.48491	0.0555556	22.7363	2.70805	C	0	0	0.106013	0	2.3792	0.105705	C	391.198	222	1.75888	2.12766
600549	2012	1.09861	0.25	23.2755	2.77259	C	2.83321	3.4012	0.106013	0	2.3792	-1.28059	C	391.198	222	1.76516	4.43038
600557	2012	1.38629	0.0555556	21.8627	2.83321	C	0	0	0.106013	1	2.3792	-0.992907	C	391.198	222	1.76386	2.52101
600580	2012	1.38629	0.222222	22.2863	2.70805	C	0	2.83321	0.106013	0	2.3792	-0.992907	C	391.198	222	1.76386	2.34375
600584	2012	2.07944	0.0204082	22.6707	2.56495	C	5.2933	4.62497	0.106013	0	2.3792	-0.29976	C	391.198	222	1.76072	0.746269
600588	2012	4.09434	0.00826446	22.5407	2.63906	I	0	3.63759	0.106013	1	2.38211	1.71223	I	44.3173	13	3.35191	0.584795
600601	2012	3.2581	0.0308642	22.599	3.3322	C	0	2.94444	0.106013	0	2.3792	0.878895	C	391.198	222	1.75539	2.98507
600623	2012	1.09861	0.0277778	23.0977	3.04452	C	3.17805	0	0.106013	0	2.3792	-1.28059	C	391.198	222	1.76516	1.51515
600624	2012	1.09861	0.0177515	20.9976	3.13549	S	0.693147	1.60944	0.106013	0	2.37826	-1.27965	S	2.89037	2	1.79176	4.56853
600630	2012	1.09861	0.00591716	21.6678	3.04452	C	5.18739	1.60944	0.106013	0	2.3792	-1.28059	C	391.198	222	1.76516	0
600645	2012	1.09861	0.00591716	20.9331	3.04452	M	0	0	0.106013	1	2.37019	-1.27158	M	3.49651	2	2.3979	1.5625
600660	2012	0.693147	0.0473373	23.2914	3.04452	C	0	2.94444	0.106013	0	2.3792	-1.68605	C	391.198	222	1.76699	5.45455
600690	2012	2.3979	0.375	24.629	3.17805	C	0	6.29527	0.106013	0	2.3792	0.0186935	C	391.198	222	1.75928	0
600718	2012	3.63759	0.0798611	22.8635	3.09104	I	0	0	0.106013	1	2.38211	1.25547	I	44.3173	13	3.38998	0.465116
600728	2012	4.35671	0.00694444	20.9037	2.99573	I	0	0	0.106013	0	2.38211	1.9746	I	44.3173	13	3.33005	0.584795
600796	2012	0.693147	0.0625	21.01	2.99573	C	0	1.09861	0.106013	1	2.3792	-1.68605	C	391.198	222	1.76699	1.16279
600808	2012	1.38629	0.0177515	25.0541	2.99573	C	0	0	0.106013	0	2.3792	-0.992907	C	391.198	222	1.76386	0.956938
600815	2012	1.38629	0.333333	23.1865	2.94444	C	0	0	0.106013	0	2.3792	-0.992907	C	391.198	222	1.76386	3.57143
600839	2012	2.19722	0.07	24.7223	2.99573	C	0	5.38907	0.106013	0	2.3792	-0.181977	C	391.198	222	1.76019	1.66667
600845	2012	3.3322	0.0123457	21.8916	2.94444	I	0	0	0.106013	0	2.38211	0.950091	I	44.3173	13	3.41542	3.84615
600853	2012	0	1	22.5327	2.99573	E	0	0	0.106013	0	2.3557	-2.3557	E	15.1326	12	1.37569	1.20482
600874	2012	1.09861	0.0204082	23.0561	2.99573	D	2.19722	1.09861	0.106013	0	2.35397	-1.25536	D	2.48491	3	0.693147	1.81818
600875	2012	0.693147	0.0625	25.0842	2.99573	C	0	4.02535	0.106013	0	2.3792	-1.68605	C	391.198	222	1.76699	1.82648
600887	2012	1.09861	0.21875	23.7097	2.99573	C	0	0	0.106013	1	2.3792	-1.28059	C	391.198	222	1.76516	0.884956
600895	2012	1.79176	0.00826446	23.6269	2.83321	S	0	0	0.106013	0	2.37826	-0.586503	S	2.89037	2	1.09861	1.51515
600900	2012	1.38629	1	25.7682	2.3979	D	0	0	0.106013	0	2.35397	-0.967678	D	2.48491	3	0.549306	1.22699
600962	2012	1.79176	0.03125	21.6487	2.48491	C	0	2.3979	0.106013	1	2.3792	-0.587442	C	391.198	222	1.76202	0.671141
601117	2012	2.77259	0.222222	24.8017	1.60944	E	4.51086	3.7612	0.106013	0	2.3557	0.416887	E	15.1326	12	1.12364	3.50877
601137	2012	1.60944	1	21.5489	2.99573	C	0	1.94591	0.106013	0	2.3792	-0.769764	C	391.198	222	1.76285	0
601177	2012	2.48491	0.5	21.9073	2.77259	C	0	1.94591	0.106013	0	2.3792	0.105705	C	391.198	222	1.75888	3.73444
601231	2012	1.60944	6	22.8196	2.30259	C	0	0	0.106013	0	2.3792	-0.769764	C	391.198	222	1.76285	1.02389
601515	2012	0.693147	1	21.7482	3.4012	C	0	0	0.106013	0	2.3792	-1.68605	C	391.198	222	1.76699	0
601607	2012	0.693147	0.222222	24.6564	2.94444	F	0	3.52636	0.106013	0	2.35517	-1.66202	F	8.57395	6	1.57616	2.55102
601618	2012	2.70805	0.611111	26.5109	1.60944	E	0	7.19068	0.106013	0	2.3557	0.352348	E	15.1326	12	1.1295	2.30548
601668	2012	0.693147	0.333333	27.2028	1.79176	E	0	4.44265	0.106013	0	2.3557	-1.66255	E	15.1326	12	1.31268	1.28205
601777	2012	1.38629	3.125	23.3659	2.77259	C	0	0	0.106013	0	2.3792	-0.992907	C	391.198	222	1.76386	0
601800	2012	1.09861	5	26.7964	1.94591	E	0	0	0.106013	0	2.3557	-1.25709	E	15.1326	12	1.27582	1.43541
601808	2012	0.693147	0.42	25.0369	2.3979	B	0	0	0.106013	0	2.36209	-1.66894	B	13.7343	10	1.44902	1.77515
601857	2012	0.693147	0.04	28.4052	2.63906	B	0	0	0.106013	0	2.36209	-1.66894	B	13.7343	10	1.44902	0
601877	2012	1.79176	1.625	23.0158	2.77259	C	0	0	0.106013	0	2.3792	-0.587442	C	391.198	222	1.76202	2.92398
601886	2012	5.69315	8	23.2443	2.63906	E	4.49981	9.63906	0.106013	0	2.3557	3.66255	E	15.1326	12	1.31268	4.7619
601899	2012	1.94591	0.15625	24.9332	2.56495	B	0	2.89037	0.106013	0	2.36209	-0.416182	B	13.7343	10	1.30982	1.00503
601958	2012	0.693147	0.04	23.4166	1.79176	B	0	0	0.106013	0	2.36209	-1.66894	B	13.7343	10	1.44902	0
601991	2012	0	0.0277778	26.3262	2.94444	D	0	2.30259	0.106013	0	2.35397	-2.35397	D	2.48491	3	1.24245	1.50376
601992	2012	1.38629	0.25	25.1441	2.07944	C	0	0	0.106013	0	2.3792	-0.992907	C	391.198	222	1.76386	4
12	2013	0.693147	0.00510204	23.4366	3.4012	C	0	0	0.106013	1	2.3792	-1.68605	C	498.689	291	1.71723	1.38889
21	2013	1.79176	0.0255102	23.3426	3.04452	C	0	0	0.106013	0	2.3792	-0.587442	C	498.689	291	1.71344	2.08333
26	2013	1.09861	0.0555556	21.9927	3.29584	F	3.63759	1.38629	0.106013	0	2.35517	-1.25655	F	8.80927	6	1.54213	5.40541
32	2013	3.29584	0.00510204	21.1297	3.04452	C	0	0	0.144014	0	2.3792	0.916635	C	498.689	291	1.70825	1.44928
45	2013	1.09861	0.00510204	21.7712	3.46574	F	1.38629	0.693147	0.144014	0	2.35517	-1.25655	F	8.80927	6	1.54213	0
49	2013	0.693147	0.15625	21.9385	2.94444	C	4.78749	4.09434	0.144014	0	2.3792	-1.68605	C	498.689	291	1.71723	1.25
55	2013	1.60944	0.00694444	21.6786	2.99573	C	0	4.04305	0.144014	1	2.3792	-0.769764	C	498.689	291	1.71407	0
78	2013	2.07944	0.0694444	22.8051	3.09104	F	0	0	0.144014	0	2.35517	-0.275724	F	8.80927	6	1.34596	1.31579
90	2013	2.56495	0.00591716	23.0048	3.04452	E	0	1.79176	0.144014	0	2.3557	0.209248	E	19.5822	15	1.21552	0.537634
100	2013	2.48491	0.685	25.081	2.48491	C	0	0	0.106013	1	2.3792	0.105705	C	498.689	291	1.71105	1.71429
157	2013	1.09861	0.0826446	25.2179	2.70805	C	0	0	0.106013	1	2.3792	-1.28059	C	498.689	291	1.71583	0.900901
158	2013	1.09861	0.111111	22.4765	2.77259	C	0	0	0.106013	0	2.3792	-1.28059	C	498.689	291	1.71583	1.51515
404	2013	1.60944	1	22.5741	2.99573	C	2.56495	1.60944	0.144014	0	2.3792	-0.769764	C	498.689	291	1.71407	2.11268
410	2013	1.94591	0.0204082	23.5189	3.04452	C	0	0	0.144014	0	2.3792	-0.433292	C	498.689	291	1.71291	0.775194
513	2013	0	0.0178571	22.6052	3.3673	C	2.07944	3.2581	0.144014	0	2.3792	-2.3792	C	498.689	291	1.71962	0
528	2013	0	0.12963	23.8225	3.04452	C	0	0	0.144014	0	2.3792	-2.3792	C	498.689	291	1.71962	3.09278
566	2013	1.94591	1	21.968	3.09104	C	0	0	0.144014	0	2.3792	-0.433292	C	498.689	291	1.71291	3.00752
589	2013	2.07944	0.111111	22.7477	2.89037	C	4.36945	1.38629	0.144014	0	2.3792	-0.29976	C	498.689	291	1.71245	0
607	2013	2.19722	0.03125	21.3936	3.04452	C	0	3.58352	0.144014	0	2.3792	-0.181977	C	498.689	291	1.71204	0
630	2013	1.09861	1	24.4058	3.09104	C	0	0	0.144014	0	2.3792	-1.28059	C	498.689	291	1.71583	1.24224
636	2013	1.60944	0.1	22.0762	2.99573	C	0	0	0.144014	0	2.3792	-0.769764	C	498.689	291	1.71407	0
678	2013	2.07944	5	21.4905	3.04452	C	0	0	0.144014	1	2.3792	-0.29976	C	498.689	291	1.71245	1.68539
680	2013	1.38629	2.125	23.2554	3.04452	C	0	0	0.144014	0	2.3792	-0.992907	C	498.689	291	1.71484	2.72727
701	2013	3.43399	0.01	22.8592	3.09104	F	0	1.79176	0.144014	0	2.35517	1.07882	F	8.80927	6	1.07506	2.34742
709	2013	1.94591	0.015625	25.8406	2.99573	C	0	0	0.144014	0	2.3792	-0.433292	C	498.689	291	1.71291	3.2
726	2013	1.79176	0.00826446	22.8529	3.04452	C	2.94444	2.30259	0.144014	0	2.3792	-0.587442	C	498.689	291	1.71344	1.94805
731	2013	0.693147	0.04	22.2967	2.99573	C	0	0	0.144014	0	2.3792	-1.68605	C	498.689	291	1.71723	4.48718
756	2013	1.09861	0.02	22.0712	3.04452	C	0	3.04452	0.144014	0	2.3792	-1.28059	C	498.689	291	1.71583	0
758	2013	1.94591	0.0433673	23.5513	2.83321	B	0	3.29584	0.144014	0	2.36209	-0.416182	B	16.4217	15	1.03399	0.754717
816	2013	0.693147	0.0555556	22.4144	2.83321	C	0	0	0.144014	0	2.3792	-1.68605	C	498.689	291	1.71723	3.40909
821	2013	0	0.125	21.3559	3.04452	C	4.31749	2.48491	0.144014	0	2.3792	-2.3792	C	498.689	291	1.71962	0.671141
837	2013	1.60944	0.0185185	21.5467	2.77259	C	0	1.09861	0.144014	0	2.3792	-0.769764	C	498.689	291	1.71407	1.04167
887	2013	0	0.16	22.1444	2.77259	C	0	3.09104	0.144014	0	2.3792	-2.3792	C	498.689	291	1.71962	0.980392
919	2013	0	0.0625	21.9185	2.77259	C	0	1.38629	0.144014	0	2.3792	-2.3792	C	498.689	291	1.71962	0.980392
921	2013	2.48491	0.0229592	23.2052	3.09104	C	5.92426	5.03044	0.144014	0	2.3792	0.105705	C	498.689	291	1.71105	1.96078
930	2013	1.09861	0.0347222	22.6029	2.77259	C	0	0	0.144014	0	2.3792	-1.28059	C	498.689	291	1.71583	4.28571
962	2013	1.38629	2	22.2798	2.70805	C	0	0	0.144014	0	2.3792	-0.992907	C	498.689	291	1.71484	0.649351
982	2013	2.30259	0.2	22.8679	2.77259	C	2.56495	1.09861	0.144014	1	2.3792	-0.0766167	C	498.689	291	1.71168	0
988	2013	3.7612	0.00591716	22.1519	2.70805	C	0	3.17805	0.144014	0	2.3792	1.382	C	498.689	291	1.70665	2.07612
990	2013	2.07944	1.5	21.9263	2.77259	C	0	0	0.144014	0	2.3792	-0.29976	C	498.689	291	1.71245	0.952381
997	2013	4.34381	0.1875	22.0299	2.70805	I	0	3.85015	0.144014	0	2.38211	1.96169	I	76.663	21	3.61596	2.29008
999	2013	2.07944	0.0138889	23.0498	2.70805	C	0	1.60944	0.144014	0	2.3792	-0.29976	C	498.689	291	1.71245	4.13223
2001	2013	0.693147	0.0185185	22.8699	2.70805	C	0	0	0.106013	0	2.3792	-1.68605	C	498.689	291	1.71723	2.27273
2003	2013	1.79176	0.25	21.4521	2.63906	C	0	0	0.106013	0	2.3792	-0.587442	C	498.689	291	1.71344	1.62602
2004	2013	1.09861	2	22.7577	2.56495	C	0	0	0.106013	1	2.3792	-1.28059	C	498.689	291	1.71583	3.66492
2008	2013	2.56495	0.117284	22.616	2.56495	C	0	0	0.106013	1	2.3792	0.185748	C	498.689	291	1.71077	0.512821
2011	2013	2.19722	0.0694444	22.9742	2.56495	C	0	4.21951	0.106013	0	2.3792	-0.181977	C	498.689	291	1.71204	3.73832
2021	2013	0	0.09375	21.9178	2.99573	C	4.93447	3.29584	0.106013	0	2.3792	-2.3792	C	498.689	291	1.71962	0.552486
2028	2013	1.79176	0.5	22.3313	2.63906	C	5.32788	4.34381	0.106013	1	2.3792	-0.587442	C	498.689	291	1.71344	1.05263
2030	2013	2.63906	0.125	20.8675	2.56495	C	1.94591	2.94444	0.106013	0	2.3792	0.259856	C	498.689	291	1.71052	0
2031	2013	1.79176	1.375	21.7587	2.56495	C	3.13549	2.19722	0.106013	0	2.3792	-0.587442	C	498.689	291	1.71344	1.34228
2032	2013	0	0.0277778	22.4703	2.77259	C	0	1.79176	0.106013	0	2.3792	-2.3792	C	498.689	291	1.71962	0
2038	2013	2.19722	1	21.721	2.63906	C	0	0	0.106013	1	2.3792	-0.181977	C	498.689	291	1.71204	1.04712
2042	2013	1.09861	0.15625	22.7925	2.63906	C	2.19722	3.13549	0.106013	0	2.3792	-1.28059	C	498.689	291	1.71583	4.21053
2045	2013	1.94591	0.0625	21.6861	3.04452	C	4.12713	1.79176	0.106013	0	2.3792	-0.433292	C	498.689	291	1.71291	1.03627
2055	2013	1.60944	0.0408163	21.8008	2.48491	C	4.02535	1.38629	0.106013	1	2.3792	-0.769764	C	498.689	291	1.71407	0
2056	2013	2.3979	0.75	22.203	2.70805	C	5.25227	4.23411	0.106013	1	2.3792	0.0186935	C	498.689	291	1.71135	1.2605
2062	2013	1.38629	0.04	23.249	2.99573	E	3.7612	1.60944	0.106013	0	2.3557	-0.969407	E	19.5822	15	1.29971	3.38983
2067	2013	0	0.0277778	22.3698	2.56495	C	0.693147	1.09861	0.106013	0	2.3792	-2.3792	C	498.689	291	1.71962	0.956938
2069	2013	2.89037	0.2	22.3939	2.56495	A	0	1.94591	0.106013	1	2.38807	0.5023	A	5.8861	4	0.998577	0.775194
2078	2013	1.94591	0.08	23.4889	2.63906	C	0	0	0.106013	1	2.3792	-0.433292	C	498.689	291	1.71291	0.8
2079	2013	1.94591	0.15625	21.0992	3.17805	C	2.70805	2.19722	0.106013	1	2.3792	-0.433292	C	498.689	291	1.71291	0.396825
2081	2013	2.30259	3.5	23.6054	3.04452	E	0	2.63906	0.106013	0	2.3557	-0.0531166	E	19.5822	15	1.23426	1.94805
2083	2013	1.60944	0.0306122	22.6608	2.48491	C	0	0	0.106013	0	2.3792	-0.769764	C	498.689	291	1.71407	3.94737
2084	2013	2.56495	0.0408163	21.2247	2.3979	C	3.3673	2.70805	0.106013	0	2.3792	0.185748	C	498.689	291	1.71077	0.555556
2085	2013	2.07944	0.0612245	22.1614	2.56495	C	0	0	0.106013	0	2.3792	-0.29976	C	498.689	291	1.71245	2.17391
2086	2013	0	0.111111	21.6457	2.56495	A	0	0	0.106013	1	2.38807	-2.38807	A	5.8861	4	1.96203	0.561798
2090	2013	4.14313	0.625	21.1551	2.94444	C	0	1.60944	0.106013	0	2.3792	1.76393	C	498.689	291	1.70533	1.67364
2091	2013	0	0.0277778	21.4946	2.77259	F	1.09861	3.49651	0.106013	0	2.35517	-2.35517	F	8.80927	6	1.76185	0.78125
2094	2013	0	0.0408163	20.8258	2.83321	C	4.82028	1.38629	0.106013	0	2.3792	-2.3792	C	498.689	291	1.71962	0
2097	2013	1.38629	0.21875	22.4514	2.56495	C	0	3.80666	0.106013	1	2.3792	-0.992907	C	498.689	291	1.71484	1.5873
2098	2013	1.60944	0.0625	20.9992	3.09104	C	0	0	0.106013	1	2.3792	-0.769764	C	498.689	291	1.71407	0.877193
2099	2013	1.09861	0.5	21.4697	2.30259	C	0	0	0.106013	1	2.3792	-1.28059	C	498.689	291	1.71583	1.03093
2103	2013	0.693147	0.0612245	20.8814	2.56495	C	3.46574	0	0.106013	0	2.3792	-1.68605	C	498.689	291	1.71723	0.578035
2104	2013	1.38629	0.5	20.9297	2.89037	C	1.38629	0	0.106013	0	2.3792	-0.992907	C	498.689	291	1.71484	0
2111	2013	2.07944	0.0625	21.4608	2.48491	C	3.21888	1.94591	0.106013	0	2.3792	-0.29976	C	498.689	291	1.71245	0.687285
2115	2013	3.04452	0.06	21.4095	2.30259	C	4.55388	3.17805	0.106013	0	2.3792	0.665321	C	498.689	291	1.70912	0.613497
2120	2013	1.38629	0.1	20.5712	2.89037	C	3.63759	1.38629	0.106013	0	2.3792	-0.992907	C	498.689	291	1.71484	2.32558
2123	2013	0.693147	1	22.2082	2.77259	C	3.71357	3.21888	0.106013	1	2.3792	-1.68605	C	498.689	291	1.71723	0
2126	2013	1.09861	0.125	21.8716	2.70805	C	2.94444	2.07944	0.106013	0	2.3792	-1.28059	C	498.689	291	1.71583	1.47059
2129	2013	1.79176	1	23.0895	2.77259	C	0	0	0.106013	0	2.3792	-0.587442	C	498.689	291	1.71344	1.28205
2130	2013	1.60944	0.06	21.3535	2.77259	C	0	0	0.106013	0	2.3792	-0.769764	C	498.689	291	1.71407	1.81818
2137	2013	1.94591	0.0416667	20.5837	2.77259	C	0	0	0.106013	0	2.3792	-0.433292	C	498.689	291	1.71291	2.58621
2151	2013	2.48491	0.0277778	21.2484	2.63906	C	0	2.83321	0.106013	0	2.3792	0.105705	C	498.689	291	1.71105	1.0101
2152	2013	2.83321	0.22	22.3437	2.70805	C	4.45435	4.30407	0.106013	0	2.3792	0.454012	C	498.689	291	1.70985	0
2156	2013	1.79176	0.0277778	22.0279	2.99573	C	0	0	0.106013	0	2.3792	-0.587442	C	498.689	291	1.71344	0
2158	2013	1.09861	0.5	20.86	2.77259	C	3.97029	1.60944	0.106013	1	2.3792	-1.28059	C	498.689	291	1.71583	0.719424
2161	2013	4.23411	1	21.1779	2.3979	C	3.8712	2.56495	0.106013	0	2.3792	1.8549	C	498.689	291	1.70502	0
2163	2013	2.07944	0.1	22.7351	2.94444	E	2.99573	2.19722	0.106013	0	2.3557	-0.27626	E	19.5822	15	1.2502	0.729927
2165	2013	1.38629	0.0277778	21.3298	2.99573	C	0	0.693147	0.106013	0	2.3792	-0.992907	C	498.689	291	1.71484	2.20049
2166	2013	1.09861	0.25	20.8622	2.63906	C	0	0	0.106013	1	2.3792	-1.28059	C	498.689	291	1.71583	3.1746
2167	2013	0.693147	0.166667	21.8452	2.94444	C	2.19722	2.30259	0.106013	0	2.3792	-1.68605	C	498.689	291	1.71723	0
2177	2013	1.79176	0.5	21.2746	2.56495	C	3.3322	1.60944	0.106013	1	2.3792	-0.587442	C	498.689	291	1.71344	0
2188	2013	1.09861	0.04	19.6916	2.07944	C	1.60944	0.693147	0.106013	0	2.3792	-1.28059	C	498.689	291	1.71583	1.92308
2191	2013	0.693147	0.0694444	22.229	2.89037	C	3.21888	3.13549	0.106013	0	2.3792	-1.68605	C	498.689	291	1.71723	1.65289
2194	2013	1.94591	0.0625	21.5559	3.21888	C	4.70048	2.07944	0.106013	0	2.3792	-0.433292	C	498.689	291	1.71291	0.666667
2203	2013	1.94591	0.166667	22.7134	2.56495	C	0	0.693147	0.106013	0	2.3792	-0.433292	C	498.689	291	1.71291	3.37838
2209	2013	2.56495	1	21.2231	2.77259	C	0	0	0.106013	1	2.3792	0.185748	C	498.689	291	1.71077	0
2218	2013	1.79176	0.0972222	21.6652	1.94591	C	0	0	0.106013	0	2.3792	-0.587442	C	498.689	291	1.71344	3.22581
2236	2013	3.09104	0.25	22.5196	2.48491	C	0	2.07944	0.106013	1	2.3792	0.711841	C	498.689	291	1.70896	1.30719
2241	2013	2.77259	0.3	23.2567	2.56495	C	0	5.71043	0.106013	1	2.3792	0.393387	C	498.689	291	1.71005	1.40845
2243	2013	1.94591	0.04	21.4312	1.94591	C	0	3.04452	0.106013	0	2.3792	-0.433292	C	498.689	291	1.71291	0.578035
2249	2013	2.3979	0.16	22.246	2.07944	C	0	2.48491	0.106013	0	2.3792	0.0186935	C	498.689	291	1.71135	0.41841
2281	2013	2.30259	1	21.6955	2.30259	C	0	0	0.106013	0	2.3792	-0.0766167	C	498.689	291	1.71168	0
2282	2013	2.30259	0.28125	20.8001	2.77259	C	2.19722	2.19722	0.106013	0	2.3792	-0.0766167	C	498.689	291	1.71168	0
2292	2013	1.60944	0.5	21.8997	1.94591	C	0	0	0.106013	1	2.3792	-0.769764	C	498.689	291	1.71407	0
2294	2013	1.38629	0.222222	22.0161	2.77259	C	0	2.3979	0.106013	0	2.3792	-0.992907	C	498.689	291	1.71484	1.05263
2295	2013	1.09861	0.111111	21.0592	2.19722	C	2.48491	1.09861	0.106013	0	2.3792	-1.28059	C	498.689	291	1.71583	1.88679
2303	2013	2.63906	0.125	21.6969	1.94591	C	4.27667	2.94444	0.106013	1	2.3792	0.259856	C	498.689	291	1.71052	0
2313	2013	2.19722	1.5	22.0986	2.3979	C	0	3.21888	0.106013	1	2.3792	-0.181977	C	498.689	291	1.71204	0.628931
2314	2013	0.693147	0.111111	22.0993	2.56495	E	4.21951	1.94591	0.106013	0	2.3557	-1.66255	E	19.5822	15	1.34922	2.88462
2318	2013	2.70805	0.0625	21.8547	2.30259	C	0	1.38629	0.106013	0	2.3792	0.328848	C	498.689	291	1.71028	0
2326	2013	1.94591	1	21.3891	1.94591	C	0	0	0.106013	0	2.3792	-0.433292	C	498.689	291	1.71291	1.02041
2328	2013	0.693147	0.277778	22.0309	2.83321	C	4.51086	1.60944	0.106013	0	2.3792	-1.68605	C	498.689	291	1.71723	0.588235
2332	2013	1.60944	0.25	21.7362	2.63906	C	0	1.79176	0.106013	0	2.3792	-0.769764	C	498.689	291	1.71407	3.125
2337	2013	3.09104	0.25	21.3249	2.63906	C	3.61092	4.07754	0.106013	0	2.3792	0.711841	C	498.689	291	1.70896	1.34228
2340	2013	2.63906	0.111111	22.7692	2.07944	C	0	0	0.106013	1	2.3792	0.259856	C	498.689	291	1.71052	0.636943
2342	2013	2.48491	0.75	22.1937	2.30259	C	2.77259	1.09861	0.106013	0	2.3792	0.105705	C	498.689	291	1.71105	0.318471
2345	2013	1.09861	0.09375	21.9517	2.07944	C	0	1.09861	0.106013	0	2.3792	-1.28059	C	498.689	291	1.71583	0
2348	2013	0.693147	0.0625	20.8794	3.21888	C	4.59512	0.693147	0.106013	1	2.3792	-1.68605	C	498.689	291	1.71723	0.653595
2371	2013	1.79176	0.111111	22.044	2.56495	C	0	3.66356	0.106013	0	2.3792	-0.587442	C	498.689	291	1.71344	0.555556
2376	2013	2.48491	0.166667	21.5842	2.48491	C	0	3.55535	0.106013	0	2.3792	0.105705	C	498.689	291	1.71105	1.30719
2379	2013	1.38629	2	22.6398	2.63906	C	2.89037	1.09861	0.106013	1	2.3792	-0.992907	C	498.689	291	1.71484	1.96078
2383	2013	2.48491	0.722222	21.2993	1.94591	C	0	0	0.106013	1	2.3792	0.105705	C	498.689	291	1.71105	0.609756
2385	2013	2.63906	1.5	22.8282	1.94591	C	0	2.94444	0.106013	1	2.3792	0.259856	C	498.689	291	1.71052	0.416667
2394	2013	0.693147	1.125	22.1134	2.48491	C	0	1.79176	0.106013	1	2.3792	-1.68605	C	498.689	291	1.71723	5.21739
2396	2013	4.34381	0.25	22.01	2.89037	C	0	5.39363	0.106013	0	2.3792	1.9646	C	498.689	291	1.70464	0
2398	2013	1.60944	1	21.5701	2.30259	M	2.30259	2.83321	0.106013	1	2.37019	-0.760756	M	7.90101	4	2.09719	0.409836
2399	2013	2.48491	0.5	22.8361	2.77259	C	0	1.79176	0.106013	0	2.3792	0.105705	C	498.689	291	1.71105	0.510204
2405	2013	3.63759	0.625	21.8179	1.79176	I	0	0	0.106013	0	2.38211	1.25547	I	76.663	21	3.65127	0.552486
2409	2013	0	0.333333	21.0514	2.83321	C	0	0	0.106013	1	2.3792	-2.3792	C	498.689	291	1.71962	0.740741
2410	2013	3.4012	0.333333	21.7545	1.94591	I	0	0	0.106013	0	2.38211	1.01908	I	76.663	21	3.66309	0
2414	2013	2.30259	0.25	21.7243	2.30259	C	1.94591	1.09861	0.106013	1	2.3792	-0.0766167	C	498.689	291	1.71168	1.62602
2422	2013	1.94591	2	23.6107	2.48491	C	4.55388	3.68888	0.106013	0	2.3792	-0.433292	C	498.689	291	1.71291	1.80412
2426	2013	0.693147	0.277778	21.6359	1.79176	C	3.09104	1.94591	0.106013	0	2.3792	-1.68605	C	498.689	291	1.71723	0
2427	2013	1.94591	2	21.6601	2.3979	C	1.38629	1.38629	0.106013	1	2.3792	-0.433292	C	498.689	291	1.71291	1.92308
2430	2013	2.30259	0.222222	23.0243	2.48491	C	3.04452	2.48491	0.106013	0	2.3792	-0.0766167	C	498.689	291	1.71168	0.549451
2431	2013	2.07944	0.25	22.6944	1.79176	E	1.38629	1.09861	0.106013	0	2.3557	-0.27626	E	19.5822	15	1.2502	1.19048
2440	2013	3.52636	0.166667	22.578	2.30259	C	0	3.17805	0.106013	0	2.3792	1.14716	C	498.689	291	1.70746	0
2444	2013	0.693147	0.5	22.2521	2.56495	C	4.29046	0	0.106013	1	2.3792	-1.68605	C	498.689	291	1.71723	0
2448	2013	1.38629	1	21.5692	3.17805	C	2.3979	2.94444	0.106013	0	2.3792	-0.992907	C	498.689	291	1.71484	0.689655
2456	2013	0.693147	0.444444	22.9767	1.94591	C	0	0	0.106013	0	2.3792	-1.68605	C	498.689	291	1.71723	1.25786
2459	2013	1.09861	0.75	21.2077	1.79176	C	0	0	0.106013	0	2.3792	-1.28059	C	498.689	291	1.71583	1.72414
2460	2013	2.07944	0.25	21.3088	2.63906	C	0	1.79176	0.106013	1	2.3792	-0.29976	C	498.689	291	1.71245	2.3622
2463	2013	2.07944	0.5	22.2934	3.09104	C	0	0.693147	0.106013	0	2.3792	-0.29976	C	498.689	291	1.71245	0.591716
2468	2013	3.17805	0.375	21.1592	2.56495	C	0	1.79176	0.106013	0	2.3792	0.798852	C	498.689	291	1.70866	0.851064
2470	2013	1.09861	0.166667	22.8866	2.77259	C	0	2.94444	0.106013	1	2.3792	-1.28059	C	498.689	291	1.71583	1.33333
2493	2013	1.09861	0.166667	24.0685	1.94591	C	0	2.63906	0.106013	0	2.3792	-1.28059	C	498.689	291	1.71583	1.70455
2496	2013	0.693147	2.5	22.0613	2.70805	C	0	0	0.106013	1	2.3792	-1.68605	C	498.689	291	1.71723	0
2514	2013	2.30259	0.111111	20.3087	2.56495	C	3.09104	1.79176	0.106013	0	2.3792	-0.0766167	C	498.689	291	1.71168	0.561798
2518	2013	2.3979	0.111111	21.4375	3.04452	C	3.3322	2.3979	0.106013	1	2.3792	0.0186935	C	498.689	291	1.71135	1.53846
2527	2013	2.94444	0.5	21.3003	2.94444	C	4.45435	3.43399	0.106013	0	2.3792	0.565237	C	498.689	291	1.70946	1.40845
2531	2013	0	0.75	21.7975	2.19722	C	0	1.79176	0.106013	1	2.3792	-2.3792	C	498.689	291	1.71962	4.34783
2543	2013	2.70805	0.25	21.9924	2.3979	C	6.70441	3.63759	0.106013	0	2.3792	0.328848	C	498.689	291	1.71028	0.995025
2544	2013	4.36945	0.75	21.4499	2.99573	I	0	5.82305	0.106013	0	2.38211	1.98733	I	76.663	21	3.61468	0.546448
2547	2013	1.94591	1.25	21.3128	2.56495	C	3.7612	2.56495	0.106013	1	2.3792	-0.433292	C	498.689	291	1.71291	0.380228
2554	2013	1.38629	0.111111	21.3498	2.77259	B	2.48491	0	0.106013	1	2.36209	-0.975798	B	16.4217	15	1.07396	1.88679
2557	2013	1.79176	1	22.0769	2.56495	C	0	0	0.106013	0	2.3792	-0.587442	C	498.689	291	1.71344	0.775194
2577	2013	1.79176	0.5	21.1212	2.48491	C	3.55535	3.29584	0.106013	1	2.3792	-0.587442	C	498.689	291	1.71344	0
2579	2013	1.94591	0.25	20.5015	2.63906	C	0	2.19722	0.106013	0	2.3792	-0.433292	C	498.689	291	1.71291	2.87356
2583	2013	3.46574	1.25	21.9538	3.04452	C	0	0	0.106013	1	2.3792	1.08653	C	498.689	291	1.70766	1.28205
2584	2013	0	1	21.1795	2.56495	C	0	0	0.106013	0	2.3792	-2.3792	C	498.689	291	1.71962	0
2593	2013	1.94591	0.5	21.666	2.94444	C	3.29584	0.693147	0.106013	1	2.3792	-0.433292	C	498.689	291	1.71291	2.6455
2600	2013	1.94591	0.625	21.5096	1.79176	C	1.60944	0.693147	0.106013	1	2.3792	-0.433292	C	498.689	291	1.71291	0
2603	2013	2.30259	0.5	22.2619	2.56495	C	2.70805	3.85015	0.106013	0	2.3792	-0.0766167	C	498.689	291	1.71168	2.5
2614	2013	1.60944	1	21.8848	2.89037	C	3.97029	1.09861	0.106013	1	2.3792	-0.769764	C	498.689	291	1.71407	1.80723
2636	2013	0	0.625	21.5997	2.63906	C	0	1.60944	0.106013	1	2.3792	-2.3792	C	498.689	291	1.71962	0.684932
2638	2013	2.07944	0.25	21.8802	2.99573	C	6.03069	4.15888	0.106013	1	2.3792	-0.29976	C	498.689	291	1.71245	0
2642	2013	4.17439	0.5	21.4926	2.56495	I	0	0	0.106013	0	2.38211	1.79227	I	76.663	21	3.62443	0.714286
2649	2013	2.19722	1.625	21.3199	2.94444	I	0	0	0.106013	0	2.38211	-0.184889	I	76.663	21	3.72329	0
2654	2013	2.07944	0.25	20.4837	2.48491	C	2.63906	0	0.106013	0	2.3792	-0.29976	C	498.689	291	1.71245	1.6129
2655	2013	2.70805	0.25	20.6571	2.56495	C	0	0	0.106013	0	2.3792	0.328848	C	498.689	291	1.71028	1.31579
2659	2013	0	1	21.2296	2.70805	E	0	0	0.106013	0	2.3557	-2.3557	E	19.5822	15	1.39873	0
2660	2013	2.30259	1	20.7564	2.07944	C	3.09104	1.79176	0.106013	1	2.3792	-0.0766167	C	498.689	291	1.71168	1.47059
2668	2013	1.94591	1	21.7744	2.48491	C	0	2.77259	0.106013	0	2.3792	-0.433292	C	498.689	291	1.71291	1.06383
2672	2013	0.693147	2	21.9073	2.70805	N	0	0	0.106013	0	2.37425	-1.6811	N	0.693147	1		1.34529
2678	2013	1.60944	2.5	21.5418	3.85015	C	0	2.30259	0.083135	0	2.3792	-0.769764	C	498.689	291	1.71407	0
2685	2013	1.38629	1	20.7267	2.30259	C	0	0	0.144014	0	2.3792	-0.992907	C	498.689	291	1.71484	1.8018
2688	2013	0	1	20.74	3.17805	C	0	0	0.144014	0	2.3792	-2.3792	C	498.689	291	1.71962	0.649351
2689	2013	2.3979	6.5	21.6814	2.56495	C	0	0	0.144014	0	2.3792	0.0186935	C	498.689	291	1.71135	1.65289
300002	2013	3.61092	0.875	22.1488	2.56495	I	0	0	0.144014	0	2.38211	1.2288	I	76.663	21	3.6526	0
300003	2013	1.38629	1	21.8637	1.79176	C	0	1.79176	0.144014	0	2.3792	-0.992907	C	498.689	291	1.71484	0.409836
300012	2013	2.70805	0.125	20.8647	2.3979	M	3.8712	1.94591	0.144014	0	2.37019	0.337856	M	7.90101	4	1.73099	1.43541
300014	2013	1.94591	0.5	20.9624	2.56495	C	2.30259	2.3979	0.144014	1	2.3792	-0.433292	C	498.689	291	1.71291	0
300017	2013	3.71357	0.222222	21.0535	2.63906	I	0	0	0.144014	1	2.38211	1.33146	I	76.663	21	3.64747	0
300036	2013	4.00733	0.125	20.5171	2.83321	I	0	0	0.144014	0	2.38211	1.62522	I	76.663	21	3.63278	0.403226
300037	2013	1.38629	0.0625	21.0928	2.48491	C	0	2.99573	0.144014	0	2.3792	-0.992907	C	498.689	291	1.71484	1.41844
300043	2013	1.60944	0.09375	21.3246	2.63906	C	2.94444	0.693147	0.144014	1	2.3792	-0.769764	C	498.689	291	1.71407	2.26244
300045	2013	3.29584	0.0625	20.626	1.79176	C	0	0	0.144014	0	2.3792	0.916635	C	498.689	291	1.70825	0.531915
300050	2013	2.94444	0.125	21.1517	2.56495	I	0	1.38629	0.144014	0	2.38211	0.562325	I	76.663	21	3.68593	0
300053	2013	2.3979	0.0625	20.3392	2.63906	C	3.04452	1.38629	0.144014	1	2.3792	0.0186935	C	498.689	291	1.71135	0
300061	2013	1.79176	0.333333	20.3776	2.89037	C	0	0	0.144014	1	2.3792	-0.587442	C	498.689	291	1.71344	0.473934
300065	2013	4.04305	0.222222	20.5429	2.56495	C	2.99573	1.38629	0.144014	0	2.3792	1.66385	C	498.689	291	1.70567	0.465116
300068	2013	2.30259	0.444444	22.1659	2.83321	C	0	2.19722	0.144014	0	2.3792	-0.0766167	C	498.689	291	1.71168	0
300073	2013	1.38629	1	20.7161	2.56495	C	1.38629	2.48491	0.144014	0	2.3792	-0.992907	C	498.689	291	1.71484	0.333333
300077	2013	3.3322	1.125	21.7669	2.63906	C	0	0	0.144014	0	2.3792	0.953003	C	498.689	291	1.70813	0
300078	2013	3.17805	1	20.9335	2.3979	C	0	2.07944	0.144014	1	2.3792	0.798852	C	498.689	291	1.70866	0
300083	2013	2.07944	0.25	21.7224	2.3979	C	3.21888	3.21888	0.144014	0	2.3792	-0.29976	C	498.689	291	1.71245	0
300084	2013	0.693147	0.5	20.6184	2.63906	B	0	0	0.144014	1	2.36209	-1.66894	B	16.4217	15	1.12347	2.54777
300088	2013	1.09861	0.111111	21.5372	2.07944	C	2.89037	2.3979	0.144014	0	2.3792	-1.28059	C	498.689	291	1.71583	0
300093	2013	1.79176	0.277778	21.09	2.99573	C	5.16479	2.19722	0.144014	1	2.3792	-0.587442	C	498.689	291	1.71344	2.53165
300094	2013	1.38629	2.5	21.6575	2.56495	A	1.79176	1.09861	0.144014	0	2.38807	-1.00178	A	5.8861	4	1.49994	0.502513
300111	2013	0.693147	1.16667	21.7789	2.19722	C	0	0.693147	0.144014	0	2.3792	-1.68605	C	498.689	291	1.71723	0.909091
300115	2013	2.56495	3	21.5741	2.56495	C	0	2.70805	0.144014	1	2.3792	0.185748	C	498.689	291	1.71077	0
300118	2013	1.09861	0.5	22.1342	1.60944	C	0	0.693147	0.144014	1	2.3792	-1.28059	C	498.689	291	1.71583	1.94175
300123	2013	1.09861	0.75	21.0231	2.3979	C	0	0	0.144014	1	2.3792	-1.28059	C	498.689	291	1.71583	3.47826
300124	2013	4.2485	0.75	22.057	2.3979	C	4.49981	1.79176	0.144014	1	2.3792	1.86929	C	498.689	291	1.70497	1.32159
300128	2013	1.94591	0.166667	21.377	2.30259	C	1.94591	0	0.144014	1	2.3792	-0.433292	C	498.689	291	1.71291	0
300129	2013	1.09861	0.375	21.5897	2.56495	C	1.38629	0	0.144014	0	2.3792	-1.28059	C	498.689	291	1.71583	1.24481
300131	2013	5.83481	1	20.8108	1.79176	C	4.56435	2.56495	0.144014	1	2.3792	3.45561	C	498.689	291	1.6995	0.790514
300132	2013	1.38629	0.25	20.7917	2.56495	C	2.19722	0.693147	0.144014	0	2.3792	-0.992907	C	498.689	291	1.71484	2
300134	2013	3.89182	0.277778	21.8125	2.56495	C	5.55296	3.78419	0.144014	0	2.3792	1.51262	C	498.689	291	1.7062	0
300136	2013	2.07944	4.5	20.4973	2.07944	C	0	2.63906	0.144014	0	2.3792	-0.29976	C	498.689	291	1.71245	1.1236
300138	2013	1.60944	0.111111	21.2129	2.63906	C	3.58352	4.11087	0.144014	1	2.3792	-0.769764	C	498.689	291	1.71407	0
300139	2013	0.693147	0.375	20.9759	2.63906	C	0	0	0.144014	0	2.3792	-1.68605	C	498.689	291	1.71723	0.632911
300151	2013	0.693147	0.111111	20.6728	2.56495	C	0	0.693147	0.144014	1	2.3792	-1.68605	C	498.689	291	1.71723	0.653595
300153	2013	1.79176	0.222222	20.7973	2.48491	C	2.77259	2.19722	0.144014	0	2.3792	-0.587442	C	498.689	291	1.71344	0.896861
300154	2013	2.07944	1	21.2287	2.3979	C	4.77068	2.48491	0.144014	1	2.3792	-0.29976	C	498.689	291	1.71245	0
300157	2013	1.94591	0.722222	21.7758	1.60944	B	1.60944	2.19722	0.144014	0	2.36209	-0.416182	B	16.4217	15	1.03399	0.401606
300164	2013	0.693147	1	21.1488	2.94444	B	0	0.693147	0.144014	1	2.36209	-1.66894	B	16.4217	15	1.12347	0
300169	2013	1.09861	2.5	21.1629	2.77259	C	1.94591	0	0.144014	1	2.3792	-1.28059	C	498.689	291	1.71583	0
300170	2013	3.4012	0.222222	21.1134	2.48491	I	0	1.60944	0.144014	0	2.38211	1.01908	I	76.663	21	3.66309	0
300171	2013	1.38629	0.222222	22.0526	3.04452	C	4.40672	1.60944	0.144014	0	2.3792	-0.992907	C	498.689	291	1.71484	0.813008
300177	2013	1.94591	0.25	20.8574	2.07944	C	2.83321	0.693147	0.144014	0	2.3792	-0.433292	C	498.689	291	1.71291	0
300191	2013	1.60944	0.625	20.9443	2.3979	B	0	1.09861	0.144014	1	2.36209	-0.752654	B	16.4217	15	1.05802	0.645161
300193	2013	1.79176	1	21.4797	2.19722	C	2.56495	1.38629	0.144014	0	2.3792	-0.587442	C	498.689	291	1.71344	0
300195	2013	2.30259	0.75	21.1663	2.94444	C	0	0	0.144014	1	2.3792	-0.0766167	C	498.689	291	1.71168	0.429185
300199	2013	1.60944	2	20.9769	2.3979	C	0	2.63906	0.144014	0	2.3792	-0.769764	C	498.689	291	1.71407	0.877193
300203	2013	3.3322	4.5	21.602	2.48491	C	4.58497	4.49981	0.144014	0	2.3792	0.953003	C	498.689	291	1.70813	0
300206	2013	2.3979	1.375	20.9641	2.94444	C	4.00733	3.3322	0.144014	1	2.3792	0.0186935	C	498.689	291	1.71135	0.628931
300207	2013	3.09104	0.375	21.755	2.83321	C	0	0	0.144014	1	2.3792	0.711841	C	498.689	291	1.70896	0
300217	2013	0	1	21.1784	2.63906	C	1.79176	1.60944	0.144014	0	2.3792	-2.3792	C	498.689	291	1.71962	0
300221	2013	0.693147	0.25	20.77	2.83321	C	1.38629	1.79176	0.144014	0	2.3792	-1.68605	C	498.689	291	1.71723	0
300223	2013	2.77259	0.25	20.81	2.19722	C	0	2.48491	0.144014	1	2.3792	0.393387	C	498.689	291	1.71005	0
300228	2013	1.38629	1	21.8364	2.3979	C	1.38629	0.693147	0.144014	0	2.3792	-0.992907	C	498.689	291	1.71484	0
300230	2013	1.09861	1.125	20.3378	2.48491	C	1.38629	1.60944	0.144014	0	2.3792	-1.28059	C	498.689	291	1.71583	1.13636
300234	2013	1.38629	1	20.262	2.3979	C	0	1.09861	0.144014	0	2.3792	-0.992907	C	498.689	291	1.71484	1.11732
300238	2013	2.07944	0.25	20.1656	2.70805	C	0	0	0.144014	0	2.3792	-0.29976	C	498.689	291	1.71245	0
300245	2013	3.66356	0.5	20.3712	2.56495	I	0	1.38629	0.144014	0	2.38211	1.28145	I	76.663	21	3.64997	0
300247	2013	1.79176	1.5	20.3228	2.94444	C	3.09104	0	0.144014	1	2.3792	-0.587442	C	498.689	291	1.71344	0.327869
300257	2013	0	1.25	22.0762	2.48491	C	0	0	0.144014	0	2.3792	-2.3792	C	498.689	291	1.71962	0
300260	2013	2.19722	4	20.6164	2.63906	C	3.85015	2.30259	0.144014	1	2.3792	-0.181977	C	498.689	291	1.71204	1.63934
300264	2013	3.04452	0.25	20.2806	2.63906	I	0	0.693147	0.144014	0	2.38211	0.662409	I	76.663	21	3.68092	0.558659
300269	2013	2.77259	0.5	20.6374	2.3979	C	3.46574	1.60944	0.144014	1	2.3792	0.393387	C	498.689	291	1.71005	0
300273	2013	2.56495	0.25	21.1727	2.89037	C	4.40672	2.19722	0.144014	1	2.3792	0.185748	C	498.689	291	1.71077	1.71674
300274	2013	1.09861	2	22.0858	2.83321	C	3.82864	3.80666	0.144014	1	2.3792	-1.28059	C	498.689	291	1.71583	0.578035
300279	2013	3.58352	1	20.1655	2.77259	C	3.8712	0.693147	0.144014	0	2.3792	1.20432	C	498.689	291	1.70726	0.574713
300284	2013	2.48491	0.5	21.8614	2.48491	M	4.35671	3.2581	0.144014	0	2.37019	0.114712	M	7.90101	4	1.80537	0
300307	2013	0.693147	3	22.2986	2.3979	C	5.11799	3.29584	0.144014	0	2.3792	-1.68605	C	498.689	291	1.71723	0
300317	2013	2.07944	4	20.8416	3.04452	C	2.99573	1.09861	0.144014	0	2.3792	-0.29976	C	498.689	291	1.71245	1.63043
300324	2013	3.98898	1	20.2781	2.83321	I	3.2581	0.693147	0.144014	1	2.38211	1.60687	I	76.663	21	3.6337	1.75439
300327	2013	2.30259	1	20.2687	2.99573	C	0	1.94591	0.144014	0	2.3792	-0.0766167	C	498.689	291	1.71168	0.680272
300328	2013	0	1	20.4151	3.04452	C	0	0	0.144014	0	2.3792	-2.3792	C	498.689	291	1.71962	0.925926
300339	2013	3.55535	5	20.8127	2.07944	I	1.38629	1.60944	0.144014	1	2.38211	1.17323	I	76.663	21	3.65538	0
300341	2013	0.693147	1	20.1757	2.48491	C	0	1.09861	0.144014	0	2.3792	-1.68605	C	498.689	291	1.71723	1.72414
600019	2013	1.38629	0.125	26.1468	2.63906	C	0	0	0.144014	0	2.3792	-0.992907	C	498.689	291	1.71484	0.35461
600028	2013	0.693147	0.0165289	27.9552	2.63906	B	0	0	0.144014	0	2.36209	-1.66894	B	16.4217	15	1.12347	2.88462
600031	2013	2.70805	0.203125	24.8801	2.63906	C	0	0	0.144014	0	2.3792	0.328848	C	498.689	291	1.71028	0.649351
600060	2013	2.30259	0.0177515	23.7123	2.83321	C	0	2.63906	0.144014	0	2.3792	-0.0766167	C	498.689	291	1.71168	1.14943
600066	2013	1.09861	0.25	23.5081	3.04452	C	0	0	0.144014	0	2.3792	-1.28059	C	498.689	291	1.71583	0
600073	2013	1.60944	0.0555556	22.4387	2.83321	C	0	0	0.144014	0	2.3792	-0.769764	C	498.689	291	1.71407	0.934579
600089	2013	1.79176	2	24.6484	3.04452	C	0	3.93183	0.144014	0	2.3792	-0.587442	C	498.689	291	1.71344	3.47826
600100	2013	4.12713	0.245	24.4744	2.83321	C	6.72982	6.19441	0.144014	0	2.3792	1.74793	C	498.689	291	1.70538	1.35135
600141	2013	1.60944	0.333333	23.4344	2.99573	C	0	1.60944	0.144014	0	2.3792	-0.769764	C	498.689	291	1.71407	0.892857
600143	2013	2.48491	0.1875	23.311	3.04452	C	0	5.33272	0.144014	0	2.3792	0.105705	C	498.689	291	1.71105	2.92683
600151	2013	2.70805	0.555556	22.7802	2.77259	C	0	3.09104	0.144014	0	2.3792	0.328848	C	498.689	291	1.71028	2.45902
600152	2013	0.693147	0.00510204	21.5788	3.04452	C	3.89182	2.19722	0.144014	0	2.3792	-1.68605	C	498.689	291	1.71723	1.0101
600160	2013	2.48491	1	22.9847	2.77259	C	0	0	0.144014	0	2.3792	0.105705	C	498.689	291	1.71105	1.52838
600169	2013	1.60944	0.75	23.8918	2.77259	C	0	0	0.144014	0	2.3792	-0.769764	C	498.689	291	1.71407	0.714286
600171	2013	2.48491	0.01	21.4682	2.77259	C	0	3.66356	0.144014	1	2.3792	0.105705	C	498.689	291	1.71105	0
600176	2013	1.60944	0.0555556	23.6797	2.70805	C	4.55388	2.94444	0.144014	0	2.3792	-0.769764	C	498.689	291	1.71407	2.61438
600177	2013	2.56495	0.0493827	24.6017	3.04452	C	0	0	0.144014	0	2.3792	0.185748	C	498.689	291	1.71077	0
600188	2013	1.09861	0.148148	25.5572	2.83321	B	0	0	0.144014	0	2.36209	-1.26348	B	16.4217	15	1.09451	0
600196	2013	1.60944	0.037037	24.1068	2.99573	C	0	0	0.144014	0	2.3792	-0.769764	C	498.689	291	1.71407	1.5873
600216	2013	1.38629	0.0833333	22.7457	2.83321	C	0	2.83321	0.144014	0	2.3792	-0.992907	C	498.689	291	1.71484	1.03093
600226	2013	0.693147	0.0204082	21.5673	2.70805	C	0	0	0.144014	1	2.3792	-1.68605	C	498.689	291	1.71723	0.543478
600261	2013	2.48491	0.045	22.1998	2.83321	C	0	0	0.144014	0	2.3792	0.105705	C	498.689	291	1.71105	2.40964
600267	2013	1.94591	0.0625	23.3603	2.77259	C	0	0	0.144014	1	2.3792	-0.433292	C	498.689	291	1.71291	1.11111
600276	2013	0.693147	0.0204082	22.7002	2.83321	C	0	0	0.144014	0	2.3792	-1.68605	C	498.689	291	1.71723	1.76991
600282	2013	1.79176	0.555556	24.3263	2.70805	C	0	5.11799	0.144014	0	2.3792	-0.587442	C	498.689	291	1.71344	0.568182
600302	2013	1.38629	0.0625	21.2789	2.70805	C	0	0	0.144014	0	2.3792	-0.992907	C	498.689	291	1.71484	0
600309	2013	2.07944	0.102041	24.1619	2.77259	C	0	4.2485	0.144014	0	2.3792	-0.29976	C	498.689	291	1.71245	0.819672
600315	2013	1.09861	0.0165289	22.2318	2.94444	C	0	2.77259	0.144014	0	2.3792	-1.28059	C	498.689	291	1.71583	2.11268
600320	2013	1.38629	0.0330579	24.6182	3.09104	C	0	0	0.144014	0	2.3792	-0.992907	C	498.689	291	1.71484	1.66667
600336	2013	1.79176	0.015	21.9075	2.77259	C	0	0	0.144014	0	2.3792	-0.587442	C	498.689	291	1.71344	1.13636
600352	2013	0	0.15625	23.6664	2.77259	C	0	0	0.144014	1	2.3792	-2.3792	C	498.689	291	1.71962	3.05344
600363	2013	2.48491	0.0123457	21.7539	2.70805	C	3.3673	0.693147	0.144014	0	2.3792	0.105705	C	498.689	291	1.71105	0
600410	2013	4.30407	0.0246914	22.465	3.2581	I	0	3.66356	0.144014	0	2.38211	1.92195	I	76.663	21	3.61795	0
600439	2013	1.38629	0.095	22.1207	2.70805	C	2.89037	1.94591	0.144014	0	2.3792	-0.992907	C	498.689	291	1.71484	2.85714
600458	2013	0.693147	0.75	22.4492	2.99573	C	3.89182	4.29046	0.144014	0	2.3792	-1.68605	C	498.689	291	1.71723	0.578035
600460	2013	2.07944	0.037037	22.1425	2.83321	C	0	0	0.144014	0	2.3792	-0.29976	C	498.689	291	1.71245	0.888889
600491	2013	1.09861	0.152778	23.5914	2.94444	E	0	0	0.144014	0	2.3557	-1.25709	E	19.5822	15	1.32026	1.47059
600496	2013	0	0.222222	22.8499	2.70805	E	0	0.693147	0.144014	0	2.3557	-2.3557	E	19.5822	15	1.39873	2.5641
600497	2013	1.09861	0.12	24.1144	2.63906	B	0	2.83321	0.144014	0	2.36209	-1.26348	B	16.4217	15	1.09451	3.14961
600499	2013	1.38629	0.0277778	22.5837	2.89037	C	6.2186	4.34381	0.144014	0	2.3792	-0.992907	C	498.689	291	1.71484	3.27869
600501	2013	1.09861	0.25	22.1197	2.70805	C	3.80666	2.63906	0.144014	0	2.3792	-1.28059	C	498.689	291	1.71583	2.17391
600510	2013	1.60944	0.0123457	23.3964	2.94444	K	0	0.693147	0.144014	0	2.37019	-0.760756	K	1.60944	1		5.31915
600522	2013	0	2	22.9189	2.70805	C	0	3.97029	0.144014	0	2.3792	-2.3792	C	498.689	291	1.71962	0.763359
600525	2013	1.09861	0.0371901	22.2854	3.3322	C	5.35659	4.39445	0.144014	0	2.3792	-1.28059	C	498.689	291	1.71583	0.862069
600526	2013	0.693147	0.111111	21.9646	2.63906	C	2.83321	2.30259	0.144014	0	2.3792	-1.68605	C	498.689	291	1.71723	2.1978
600535	2013	1.79176	0.0408163	23.0468	2.77259	C	0	4.11087	0.144014	0	2.3792	-0.587442	C	498.689	291	1.71344	1.38889
600537	2013	0.693147	1.5	22.2989	3.4012	C	0	0	0.144014	1	2.3792	-1.68605	C	498.689	291	1.71723	3.24675
600549	2013	1.09861	0.111111	23.4608	2.83321	C	2.99573	3.4012	0.144014	0	2.3792	-1.28059	C	498.689	291	1.71583	3.04878
600557	2013	1.60944	0.0408163	21.9565	2.89037	C	0	0	0.144014	1	2.3792	-0.769764	C	498.689	291	1.71407	2.27273
600572	2013	2.77259	1	22.217	3.04452	C	0	2.19722	0.144014	1	2.3792	0.393387	C	498.689	291	1.71005	4.87805
600584	2013	1.09861	0.015625	22.7491	2.63906	C	4.46591	4.2485	0.144014	0	2.3792	-1.28059	C	498.689	291	1.71583	0
600588	2013	4.36945	0.00694444	22.7015	2.70805	I	0	0	0.144014	1	2.38211	1.98733	I	76.663	21	3.61468	0
600596	2013	1.09861	0.163265	22.7027	3.04452	C	0	2.83321	0.144014	0	2.3792	-1.28059	C	498.689	291	1.71583	1.48148
600612	2013	0.693147	1	22.9573	3.09104	C	0	0	0.144014	0	2.3792	-1.68605	C	498.689	291	1.71723	0
600624	2013	1.94591	0.0153061	21.1557	3.17805	S	0.693147	0.693147	0.144014	0	2.37826	-0.432352	S	3.3322	2	1.38629	3.82979
600637	2013	2.56495	4.5	22.3621	3.09104	I	0	0	0.144014	0	2.38211	0.182836	I	76.663	21	3.7049	0.70922
600645	2013	1.09861	0.00510204	21.1187	3.09104	M	0	0	0.144014	1	2.37019	-1.27158	M	7.90101	4	2.26746	0.543478
600660	2013	1.38629	0.0408163	23.4034	3.09104	C	0	2.83321	0.144014	0	2.3792	-0.992907	C	498.689	291	1.71484	3.90625
600690	2013	3.29584	0.166667	24.8344	3.21888	C	0	0	0.144014	1	2.3792	0.916635	C	498.689	291	1.70825	0
600703	2013	1.09861	2	23.3145	3.04452	C	0	0	0.144014	0	2.3792	-1.28059	C	498.689	291	1.71583	0
600718	2013	3.52636	0.0739645	22.9615	3.13549	I	0	0	0.144014	1	2.38211	1.14425	I	76.663	21	3.65683	1.37615
600728	2013	4.06044	0.00591716	21.5139	3.04452	I	0	3.3322	0.144014	1	2.38211	1.67833	I	76.663	21	3.63013	0.892857
600796	2013	0	0.04	20.8552	3.04452	C	0	1.38629	0.144014	1	2.3792	-2.3792	C	498.689	291	1.71962	2.61438
600801	2013	0.693147	2	23.9746	3.04452	C	0	0	0.144014	0	2.3792	-1.68605	C	498.689	291	1.71723	2.77778
600808	2013	0.693147	0.0153061	24.9904	3.04452	C	4.83628	4.17439	0.144014	0	2.3792	-1.68605	C	498.689	291	1.71723	0.45045
600819	2013	1.09861	0.0123457	22.7024	3.04452	C	2.56495	0	0.144014	0	2.3792	-1.28059	C	498.689	291	1.71583	2.63158
600820	2013	0.693147	0.0138889	24.7673	3.04452	E	0	0	0.144014	0	2.3557	-1.66255	E	19.5822	15	1.34922	1.25786
600845	2013	3.78419	0.01	22.1285	2.99573	I	0	0	0.144014	0	2.38211	1.40208	I	76.663	21	3.64394	0
600853	2013	0	0.5	22.6715	3.04452	E	0.693147	0.693147	0.144014	0	2.3557	-2.3557	E	19.5822	15	1.39873	1.08696
600882	2013	0	1	21.2969	3.2581	B	0	0	0.144014	0	2.36209	-2.36209	B	16.4217	15	1.17298	4.6729
600887	2013	1.09861	0.22	24.2161	3.04452	C	4.21951	4.17439	0.144014	1	2.3792	-1.28059	C	498.689	291	1.71583	0
600894	2013	2.94444	3.5	22.4239	3.04452	C	0	1.94591	0.144014	0	2.3792	0.565237	C	498.689	291	1.70946	0
600895	2013	1.38629	0.00694444	23.6298	2.89037	S	0	0	0.144014	0	2.37826	-0.991968	S	3.3322	2	1.94591	1.50376
600962	2013	1.38629	0.0246914	21.5401	2.56495	C	0	0	0.144014	0	2.3792	-0.992907	C	498.689	291	1.71484	0.847458
600970	2013	1.09861	4	23.8877	2.56495	C	0	0	0.144014	0	2.3792	-1.28059	C	498.689	291	1.71583	3.19149
600973	2013	2.19722	1	22.6381	2.63906	C	0	0.693147	0.144014	1	2.3792	-0.181977	C	498.689	291	1.71204	1.47059
600997	2013	0	0.125	23.7448	2.56495	C	0	2.30259	0.144014	0	2.3792	-2.3792	C	498.689	291	1.71962	0.793651
601012	2013	0.693147	1	22.2682	2.63906	C	0	0	0.144014	0	2.3792	-1.68605	C	498.689	291	1.71723	3.94737
601058	2013	2.19722	5.5	22.8415	2.48491	C	0	0	0.144014	0	2.3792	-0.181977	C	498.689	291	1.71204	0.724638
601101	2013	1.38629	0.25	23.2688	2.48491	B	0	0	0.144014	0	2.36209	-0.975798	B	16.4217	15	1.07396	0.662252
601118	2013	1.60944	0.222222	23.2096	2.19722	A	0.693147	0	0.144014	0	2.38807	-0.778634	A	5.8861	4	1.42556	2.27273
601126	2013	2.94444	1	22.2728	2.99573	C	0	3.46574	0.144014	0	2.3792	0.565237	C	498.689	291	1.70946	0.985222
601137	2013	1.60944	0.25	21.6809	3.04452	C	0	0	0.144014	0	2.3792	-0.769764	C	498.689	291	1.71407	0
601177	2013	2.63906	0.222222	22.0484	2.83321	C	0	2.56495	0.144014	0	2.3792	0.259856	C	498.689	291	1.71052	3.01205
601179	2013	2.07944	0.0625	24.2044	1.79176	C	0	0	0.144014	0	2.3792	-0.29976	C	498.689	291	1.71245	3.78378
601222	2013	2.56495	1	21.9054	2.94444	C	0	2.56495	0.144014	1	2.3792	0.185748	C	498.689	291	1.71077	2.45399
601231	2013	0.693147	1.5	22.8608	2.3979	C	0	0	0.144014	0	2.3792	-1.68605	C	498.689	291	1.71723	1.13208
601238	2013	1.94591	6.5	24.7801	2.83321	C	0	0	0.144014	0	2.3792	-0.433292	C	498.689	291	1.71291	1.04712
601339	2013	0.693147	4.5	22.9083	2.30259	C	1.09861	1.94591	0.144014	0	2.3792	-1.68605	C	498.689	291	1.71723	0.862069
601515	2013	0	0.375	21.8938	3.43399	C	0	0	0.144014	0	2.3792	-2.3792	C	498.689	291	1.71962	1.40845
601599	2013	0	1	21.6703	2.48491	C	0	1.09861	0.144014	0	2.3792	-2.3792	C	498.689	291	1.71962	0
601600	2013	1.09861	0.0277778	26.0191	2.56495	C	0	6.29157	0.144014	0	2.3792	-1.28059	C	498.689	291	1.71583	2.13675
601607	2013	1.09861	0.0625	24.7542	2.99573	F	0	0	0.144014	0	2.35517	-1.25655	F	8.80927	6	1.54213	1.18343
601608	2013	1.94591	2	23.5904	3.43399	C	0	4.48864	0.144014	0	2.3792	-0.433292	C	498.689	291	1.71291	0.995025
601618	2013	2.07944	0.34375	26.5006	1.79176	E	0	7.70301	0.144014	0	2.3557	-0.27626	E	19.5822	15	1.2502	4.21687
601668	2013	2.30259	0.1875	27.3874	1.94591	E	0	0	0.144014	0	2.3557	-0.0531166	E	19.5822	15	1.23426	1.19904
601800	2013	1.60944	1.25	26.9732	2.07944	E	0	0	0.144014	1	2.3557	-0.746264	E	19.5822	15	1.28377	1.2766
601808	2013	1.09861	0.291667	25.096	2.48491	B	0	3.82864	0.144014	0	2.36209	-1.26348	B	16.4217	15	1.09451	0.534759
601857	2013	0.693147	0.0277778	28.482	2.70805	B	0	0	0.144014	0	2.36209	-1.66894	B	16.4217	15	1.12347	0
601877	2013	1.94591	0.722222	23.1218	2.83321	C	0	0	0.144014	1	2.3792	-0.433292	C	498.689	291	1.71291	2.7027
601886	2013	0.693147	4	23.4428	2.70805	E	0	1.09861	0.144014	0	2.3557	-1.66255	E	19.5822	15	1.34922	3.66972
601899	2013	1.38629	0.1	24.9264	2.63906	B	0	2.3979	0.144014	0	2.36209	-0.975798	B	16.4217	15	1.07396	0.512821
601958	2013	0.693147	0.0277778	23.4638	1.94591	B	3.21888	3.68888	0.144014	0	2.36209	-1.66894	B	16.4217	15	1.12347	0
601991	2013	0.693147	0.0204082	26.4045	2.99573	D	0	0	0.144014	0	2.35397	-1.66083	D	0.693147	1		2
601992	2013	1.60944	0.111111	25.3168	2.19722	C	0	0	0.144014	0	2.3792	-0.769764	C	498.689	291	1.71407	3.25203
603002	2013	1.09861	1	21.0185	2.94444	C	0	1.60944	0.144014	1	2.3792	-1.28059	C	498.689	291	1.71583	5.6338
12	2014	1.38629	0.00888889	23.4501	3.43399	C	0	0	0.144014	0	2.3792	-0.992907	C	628.595	330	1.90641	0.689655
21	2014	1.60944	0.0288889	23.394	3.09104	C	0	2.19722	0.144014	0	2.3792	-0.769764	C	628.595	330	1.90573	0.699301
26	2014	2.07944	0.0816327	22.0201	3.3322	F	3.2581	1.38629	0.144014	0	2.35517	-0.275724	F	14.427	8	1.76394	0
32	2014	2.89037	0.00444444	21.741	3.09104	C	0	0	0.12407	0	2.3792	0.51117	C	628.595	330	1.90184	1.06952
39	2014	2.56495	0.0755556	25.1981	3.13549	C	0	0	0.12407	0	2.3792	0.185748	C	628.595	330	1.90283	2.96496
45	2014	1.60944	0.00444444	21.761	3.49651	F	1.09861	1.09861	0.12407	0	2.35517	-0.745727	F	14.427	8	1.83108	0
49	2014	1.38629	0.14	22.2656	2.99573	C	3.7612	4.00733	0.12407	0	2.3792	-0.992907	C	628.595	330	1.90641	0.961538
78	2014	1.60944	0.0408163	22.9883	3.13549	F	0	2.56495	0.12407	0	2.35517	-0.745727	F	14.427	8	1.83108	0.558659
90	2014	2.77259	0.00510204	23.1236	3.09104	E	2.89037	2.19722	0.12407	0	2.3557	0.416887	E	25.7226	16	1.53	0.97561
100	2014	2.94444	0.628099	25.2545	2.56495	C	0	0	0.144014	1	2.3792	0.565237	C	628.595	330	1.90167	0.78125
158	2014	0.693147	0.0625	22.4376	2.83321	C	0	2.19722	0.144014	0	2.3792	-1.68605	C	628.595	330	1.90852	0
333	2014	3.3673	1	25.5132	2.70805	C	0	7.85787	0.12407	1	2.3792	0.988094	C	628.595	330	1.90039	5.38462
404	2014	2.07944	0.25	22.611	3.04452	C	3.46574	1.09861	0.12407	0	2.3792	-0.29976	C	628.595	330	1.9043	1.95122
513	2014	1.38629	0.0155556	22.7115	3.4012	C	0	3.63759	0.12407	0	2.3792	-0.992907	C	628.595	330	1.90641	2.41935
528	2014	1.79176	0.115	23.7583	3.09104	C	4.61512	5.0814	0.12407	0	2.3792	-0.587442	C	628.595	330	1.90518	3.01205
566	2014	2.30259	0.25	22.0244	3.13549	C	0	2.07944	0.12407	0	2.3792	-0.0766167	C	628.595	330	1.90362	2.20588
630	2014	2.48491	0.25	24.5719	3.13549	C	0	0	0.12407	0	2.3792	0.105705	C	628.595	330	1.90307	1.1976
636	2014	1.60944	0.0694444	22.3492	3.04452	C	0	3.71357	0.12407	0	2.3792	-0.769764	C	628.595	330	1.90573	0
678	2014	1.60944	1.125	21.5306	3.09104	C	2.3979	1.94591	0.12407	1	2.3792	-0.769764	C	628.595	330	1.90573	1.70455
680	2014	1.79176	0.944444	23.1401	3.09104	C	0	0	0.12407	0	2.3792	-0.587442	C	628.595	330	1.90518	3.42466
701	2014	3.17805	0.0206612	23.078	3.13549	F	3.61092	0	0.12407	0	2.35517	0.822889	F	14.427	8	1.60699	0.411523
709	2014	1.38629	0.0123457	25.8612	3.04452	C	0	0	0.12407	0	2.3792	-0.992907	C	628.595	330	1.90641	0
725	2014	2.30259	0.00510204	25.6377	3.09104	C	0	0	0.12407	0	2.3792	-0.0766167	C	628.595	330	1.90362	0
726	2014	1.79176	0.0277778	22.8782	3.09104	C	0	4.14313	0.12407	0	2.3792	-0.587442	C	628.595	330	1.90518	2.38095
731	2014	1.38629	0.0833333	22.2329	3.04452	C	0	1.79176	0.12407	0	2.3792	-0.992907	C	628.595	330	1.90641	3.04569
756	2014	1.38629	0.0165289	22.169	3.09104	C	0	0	0.12407	0	2.3792	-0.992907	C	628.595	330	1.90641	0
758	2014	1.38629	0.0511111	23.6764	2.89037	B	0	2.70805	0.12407	0	2.36209	-0.975798	B	14.9911	12	1.2368	0
778	2014	1.38629	0.3125	24.6987	2.89037	C	0	4.8828	0.12407	0	2.3792	-0.992907	C	628.595	330	1.90641	1.17647
816	2014	3.80666	0.0408163	22.688	2.89037	C	0	0	0.12407	0	2.3792	1.42746	C	628.595	330	1.89905	3.06748
821	2014	1.09861	0.08	21.3856	3.09104	C	3.04452	2.19722	0.12407	1	2.3792	-1.28059	C	628.595	330	1.90728	0
826	2014	1.38629	1	22.9797	3.09104	N	0	2.83321	0.12407	0	2.37425	-0.987953	N	2.77259	2	1.38629	1.85185
837	2014	2.07944	0.015	22.5808	2.83321	C	0	2.19722	0.12407	0	2.3792	-0.29976	C	628.595	330	1.9043	1.04167
850	2014	2.07944	1	22.622	2.83321	C	0	0	0.12407	0	2.3792	-0.29976	C	628.595	330	1.9043	0
887	2014	0	0.222222	22.4145	2.83321	C	0	3.4012	0.12407	0	2.3792	-2.3792	C	628.595	330	1.91062	1.16279
919	2014	0	0.04	22.0104	2.83321	C	0	0	0.12407	0	2.3792	-2.3792	C	628.595	330	1.91062	1.86916
932	2014	2.48491	0.277778	25.015	2.77259	C	0	4.2485	0.12407	1	2.3792	0.105705	C	628.595	330	1.90307	0.355872
962	2014	1.79176	0.5	22.137	2.77259	C	0	0	0.12407	0	2.3792	-0.587442	C	628.595	330	1.90518	1.85185
982	2014	1.94591	0.138889	23.2846	2.83321	C	0	0	0.12407	0	2.3792	-0.433292	C	628.595	330	1.90471	0.414938
988	2014	4.04305	0.0102041	22.2689	2.77259	C	0	0	0.12407	0	2.3792	1.66385	C	628.595	330	1.89833	0.507614
999	2014	1.94591	0.00887574	23.0904	2.77259	C	0	3.29584	0.12407	0	2.3792	-0.433292	C	628.595	330	1.90471	4.02685
2001	2014	0	0.015	22.9341	2.77259	C	0	2.56495	0.144014	0	2.3792	-2.3792	C	628.595	330	1.91062	2.08333
2003	2014	1.38629	0.111111	21.4799	2.70805	C	0	2.89037	0.144014	0	2.3792	-0.992907	C	628.595	330	1.90641	0
2008	2014	1.79176	0.095	22.6968	2.63906	C	7.17166	5.80513	0.144014	1	2.3792	-0.587442	C	628.595	330	1.90518	0.520833
2011	2014	1.60944	0.0918367	23.0648	2.63906	C	0	4.00733	0.144014	0	2.3792	-0.769764	C	628.595	330	1.90573	1.52672
2017	2014	3.58352	0.0493827	21.1782	2.83321	C	0	1.09861	0.144014	1	2.3792	1.20432	C	628.595	330	1.89973	0
2021	2014	0.693147	0.06	22.1298	3.04452	C	4.96284	3.55535	0.144014	1	2.3792	-1.68605	C	628.595	330	1.90852	0.8
2028	2014	1.94591	0.444444	22.416	2.70805	C	0	0	0.144014	1	2.3792	-0.433292	C	628.595	330	1.90471	0.869565
2030	2014	2.48491	0.08	21.1871	2.63906	C	0	2.30259	0.144014	0	2.3792	0.105705	C	628.595	330	1.90307	0.947867
2031	2014	1.79176	0.722222	22.1054	2.63906	C	3.43399	2.30259	0.144014	0	2.3792	-0.587442	C	628.595	330	1.90518	0.492611
2042	2014	1.60944	0.14	22.9049	2.70805	C	2.77259	2.48491	0.144014	0	2.3792	-0.769764	C	628.595	330	1.90573	3.37079
2045	2014	1.60944	0.037037	21.6668	3.09104	C	3.21888	1.38629	0.144014	0	2.3792	-0.769764	C	628.595	330	1.90573	1.23457
2056	2014	1.60944	0.333333	22.2883	2.77259	C	5.39816	4.47734	0.144014	1	2.3792	-0.769764	C	628.595	330	1.90573	0.772201
2067	2014	0	0.0408163	22.4829	2.63906	C	1.38629	1.09861	0.144014	0	2.3792	-2.3792	C	628.595	330	1.91062	1.96078
2069	2014	2.83321	0.180556	22.3081	2.63906	A	0	1.79176	0.144014	1	2.38807	0.445142	A	5.23111	3	1.19895	0
2078	2014	2.63906	0.0555556	23.514	2.70805	C	0	0	0.144014	1	2.3792	0.259856	C	628.595	330	1.9026	0
2079	2014	1.79176	0.1	21.1175	3.21888	C	2.19722	1.94591	0.144014	1	2.3792	-0.587442	C	628.595	330	1.90518	0.322581
2081	2014	2.83321	0.75	23.8009	3.09104	E	0	3.46574	0.144014	0	2.3557	0.477512	E	25.7226	16	1.52596	1.49254
2083	2014	1.60944	0.0234375	22.7738	2.56495	C	0	0	0.144014	0	2.3792	-0.769764	C	628.595	330	1.90573	5.97015
2084	2014	3.3322	0.03125	21.2454	2.48491	C	2.30259	2.30259	0.144014	0	2.3792	0.953003	C	628.595	330	1.90049	0
2086	2014	0	0.0625	21.6964	2.63906	A	0	0	0.144014	1	2.38807	-2.38807	A	5.23111	3	2.61555	0.632911
2090	2014	3.8712	0.388889	21.2237	2.99573	C	0	1.60944	0.144014	0	2.3792	1.492	C	628.595	330	1.89886	1.16732
2091	2014	0	0.0204082	21.7786	2.83321	F	0.693147	3.52636	0.144014	0	2.35517	-2.35517	F	14.427	8	2.061	0.552486
2094	2014	0	0.03125	20.9283	2.89037	C	4.67283	1.09861	0.144014	0	2.3792	-2.3792	C	628.595	330	1.91062	0
2097	2014	1.09861	0.22	22.5842	2.63906	C	0	0	0.144014	1	2.3792	-1.28059	C	628.595	330	1.90728	0
2098	2014	1.60944	0.04	21.0434	3.13549	C	0	0	0.144014	1	2.3792	-0.769764	C	628.595	330	1.90573	1.31579
2101	2014	1.38629	1	21.6604	2.70805	C	2.30259	1.60944	0.144014	0	2.3792	-0.992907	C	628.595	330	1.90641	0
2103	2014	0	0.046875	20.8804	2.63906	C	2.07944	0	0.144014	0	2.3792	-2.3792	C	628.595	330	1.91062	0.568182
2104	2014	1.38629	0.222222	21.1829	2.94444	C	0.693147	0	0.144014	0	2.3792	-0.992907	C	628.595	330	1.90641	0
2105	2014	1.38629	0.03125	21.1112	2.48491	C	2.94444	0	0.144014	0	2.3792	-0.992907	C	628.595	330	1.90641	0.458716
2111	2014	2.30259	0.04	21.6419	2.56495	C	3.2581	2.19722	0.144014	0	2.3792	-0.0766167	C	628.595	330	1.90362	0.895522
2115	2014	2.83321	0.0694444	21.4336	2.3979	C	4.56435	3.29584	0.144014	0	2.3792	0.454012	C	628.595	330	1.90201	0.555556
2120	2014	1.79176	0.0833333	20.5155	2.94444	C	2.63906	1.79176	0.144014	0	2.3792	-0.587442	C	628.595	330	1.90518	1.93548
2123	2014	1.09861	0.25	21.9805	2.83321	C	3.29584	2.89037	0.144014	1	2.3792	-1.28059	C	628.595	330	1.90728	0
2126	2014	1.60944	0.08	21.9802	2.77259	C	3.3322	2.48491	0.144014	0	2.3792	-0.769764	C	628.595	330	1.90573	0
2129	2014	1.09861	0.25	23.3739	2.83321	C	0	4.8828	0.144014	0	2.3792	-1.28059	C	628.595	330	1.90728	1.21212
2130	2014	1.94591	0.0555556	21.7011	2.83321	C	0	0	0.144014	0	2.3792	-0.433292	C	628.595	330	1.90471	1.62162
2137	2014	2.07944	0.0306122	20.3137	2.83321	C	0	1.09861	0.144014	0	2.3792	-0.29976	C	628.595	330	1.9043	1.51515
2151	2014	2.56495	0.0306122	21.3615	2.70805	C	0	2.70805	0.144014	0	2.3792	0.185748	C	628.595	330	1.90283	0
2152	2014	2.70805	0.152778	22.617	2.77259	C	4.33073	4.06044	0.144014	0	2.3792	0.328848	C	628.595	330	1.90239	0.346021
2156	2014	3.04452	0.0204082	22.0983	3.04452	C	0	0	0.144014	0	2.3792	0.665321	C	628.595	330	1.90137	0.913242
2158	2014	1.79176	0.222222	20.9576	2.83321	C	4.04305	1.60944	0.144014	1	2.3792	-0.587442	C	628.595	330	1.90518	1.51515
2161	2014	4.33073	0.875	21.2685	2.48491	C	5.25227	3.49651	0.144014	0	2.3792	1.95153	C	628.595	330	1.89746	0.436681
2165	2014	1.09861	0.0204082	21.3028	3.04452	C	1.94591	2.48491	0.144014	0	2.3792	-1.28059	C	628.595	330	1.90728	1.42857
2166	2014	1.60944	0.111111	21.1291	2.70805	C	0	0	0.144014	1	2.3792	-0.769764	C	628.595	330	1.90573	2.39521
2167	2014	0	0.09375	21.8073	2.99573	C	0.693147	0	0.144014	0	2.3792	-2.3792	C	628.595	330	1.91062	1.2
2171	2014	1.94591	1	21.4696	2.56495	C	4.31749	3.46574	0.144014	1	2.3792	-0.433292	C	628.595	330	1.90471	0.930233
2173	2014	1.09861	1	20.7633	2.48491	C	0	2.63906	0.144014	0	2.3792	-1.28059	C	628.595	330	1.90728	0
2177	2014	3.46574	0.222222	21.34	2.63906	C	3.66356	0	0.144014	1	2.3792	1.08653	C	628.595	330	1.90009	1.91083
2179	2014	1.60944	1	22.5543	2.56495	C	0	5.01728	0.144014	1	2.3792	-0.769764	C	628.595	330	1.90573	0.671141
2182	2014	2.30259	0.0204082	21.7237	3.09104	C	2.07944	0.693147	0.144014	1	2.3792	-0.0766167	C	628.595	330	1.90362	0
2188	2014	1.79176	0.0277778	19.63	2.19722	C	1.09861	0	0.144014	0	2.3792	-0.587442	C	628.595	330	1.90518	1.1236
2191	2014	2.30259	0.0510204	22.279	2.94444	C	0	2.3979	0.144014	0	2.3792	-0.0766167	C	628.595	330	1.90362	0.913242
2194	2014	2.3979	0.04	21.66	3.2581	C	0	0	0.144014	0	2.3792	0.0186935	C	628.595	330	1.90333	0.617284
2196	2014	2.3979	0.25	20.9635	2.63906	C	0	0.693147	0.144014	0	2.3792	0.0186935	C	628.595	330	1.90333	0.609756
2201	2014	1.09861	1	21.2208	3.04452	C	1.09861	2.30259	0.144014	1	2.3792	-1.28059	C	628.595	330	1.90728	0
2202	2014	3.09104	0.132653	24.5471	2.63906	C	0	4.70048	0.144014	0	2.3792	0.711841	C	628.595	330	1.90123	0.826446
2203	2014	0	0.122449	22.8294	2.63906	C	0	2.89037	0.144014	0	2.3792	-2.3792	C	628.595	330	1.91062	0
2209	2014	3.04452	0.25	21.1369	2.83321	C	0	0	0.144014	1	2.3792	0.665321	C	628.595	330	1.90137	0
2218	2014	1.38629	0.0918367	21.885	2.07944	C	3.73767	1.60944	0.144014	0	2.3792	-0.992907	C	628.595	330	1.90641	2.25225
2225	2014	1.38629	0.0555556	22.3124	2.56495	C	0	0	0.144014	0	2.3792	-0.992907	C	628.595	330	1.90641	2.06186
2236	2014	3.4012	0.333333	22.8015	2.56495	C	0	2.30259	0.144014	1	2.3792	1.022	C	628.595	330	1.90028	1.3986
2241	2014	2.83321	0.25	23.6001	2.63906	C	0	5.92426	0.144014	0	2.3792	0.454012	C	628.595	330	1.90201	0
2243	2014	2.07944	0.0277778	21.3918	2.07944	C	0	2.70805	0.144014	0	2.3792	-0.29976	C	628.595	330	1.9043	0
2249	2014	2.56495	0.111111	22.563	2.19722	C	0	3.21888	0.144014	0	2.3792	0.185748	C	628.595	330	1.90283	0.304878
2255	2014	1.94591	0.15625	21.8974	2.70805	C	2.30259	1.60944	0.144014	1	2.3792	-0.433292	C	628.595	330	1.90471	0
2271	2014	2.19722	1	22.3606	2.83321	C	1.94591	2.83321	0.144014	0	2.3792	-0.181977	C	628.595	330	1.90394	1.84332
2276	2014	2.83321	1	22.2661	2.94444	C	1.79176	1.94591	0.144014	0	2.3792	0.454012	C	628.595	330	1.90201	0.636943
2278	2014	1.09861	0.12	21.3633	3.09104	C	3.43399	1.79176	0.144014	0	2.3792	-1.28059	C	628.595	330	1.90728	0.892857
2281	2014	2.94444	0.444444	22.0002	2.3979	C	0	0	0.144014	0	2.3792	0.565237	C	628.595	330	1.90167	0
2282	2014	2.3979	0.14	20.7368	2.83321	C	2.70805	0.693147	0.144014	0	2.3792	0.0186935	C	628.595	330	1.90333	0.772201
2294	2014	1.79176	0.125	22.2528	2.83321	C	0	1.60944	0.144014	0	2.3792	-0.587442	C	628.595	330	1.90518	1.63934
2295	2014	1.38629	0.0625	20.9882	2.30259	C	0	0	0.144014	0	2.3792	-0.992907	C	628.595	330	1.90641	3.66972
2303	2014	2.70805	0.08	21.7968	2.07944	C	4.57471	2.99573	0.144014	1	2.3792	0.328848	C	628.595	330	1.90239	0
2311	2014	1.09861	0.6875	22.76	2.07944	C	0.693147	3.78419	0.144014	1	2.3792	-1.28059	C	628.595	330	1.90728	0.609756
2313	2014	1.60944	0.375	22.2186	2.48491	C	0	2.83321	0.144014	1	2.3792	-0.769764	C	628.595	330	1.90573	0.925926
2314	2014	1.79176	0.0625	21.8664	2.63906	E	4.12713	1.60944	0.144014	0	2.3557	-0.563942	E	25.7226	16	1.59539	3.27869
2318	2014	2.48491	0.04	21.982	2.3979	C	0	2.30259	0.144014	0	2.3792	0.105705	C	628.595	330	1.90307	0
2326	2014	2.63906	0.25	21.6468	2.07944	C	0	2.83321	0.144014	0	2.3792	0.259856	C	628.595	330	1.9026	1.51515
2328	2014	1.09861	0.21875	22.0775	2.89037	C	2.56495	1.09861	0.144014	1	2.3792	-1.28059	C	628.595	330	1.90728	1.12994
2332	2014	0	0.111111	21.7538	2.70805	C	0	2.07944	0.144014	0	2.3792	-2.3792	C	628.595	330	1.91062	2.77778
2337	2014	3.52636	0.166667	21.2899	2.70805	C	3.89182	4.07754	0.144014	0	2.3792	1.14716	C	628.595	330	1.8999	3.2967
2342	2014	1.79176	0.333333	22.1198	2.3979	C	4.7362	2.63906	0.144014	0	2.3792	-0.587442	C	628.595	330	1.90518	1.26183
2345	2014	1.09861	0.06	22.1971	2.19722	C	0	1.38629	0.144014	0	2.3792	-1.28059	C	628.595	330	1.90728	0.617284
2348	2014	0.693147	0.04	20.8996	3.2581	C	0	0	0.144014	1	2.3792	-1.68605	C	628.595	330	1.90852	0.591716
2351	2014	1.60944	0.16	21.3102	2.63906	C	2.94444	0	0.144014	1	2.3792	-0.769764	C	628.595	330	1.90573	0.47619
2356	2014	2.19722	0.111111	21.581	3.04452	C	0	0	0.144014	0	2.3792	-0.181977	C	628.595	330	1.90394	1.1236
2369	2014	3.3673	0.15625	21.9058	2.3979	C	0	0	0.144014	1	2.3792	0.988094	C	628.595	330	1.90039	0.628931
2375	2014	3.46574	1	23.5991	2.07944	E	0	1.79176	0.144014	0	2.3557	1.11003	E	25.7226	16	1.48379	1.21951
2376	2014	2.70805	0.09375	21.7327	2.56495	C	0	3.85015	0.144014	0	2.3792	0.328848	C	628.595	330	1.90239	0.943396
2379	2014	0	0.5	22.3429	2.70805	C	2.89037	1.09861	0.144014	1	2.3792	-2.3792	C	628.595	330	1.91062	0
2385	2014	1.60944	0.375	23.0794	2.07944	C	0	3.78419	0.144014	1	2.3792	-0.769764	C	628.595	330	1.90573	2.30415
2386	2014	1.79176	0.25	23.4378	3.04452	C	1.94591	1.79176	0.144014	0	2.3792	-0.587442	C	628.595	330	1.90518	1.9802
2394	2014	0	0.666667	22.1797	2.56495	C	0	1.94591	0.144014	0	2.3792	-2.3792	C	628.595	330	1.91062	2.4
2396	2014	4.49981	0.111111	22.0879	2.94444	C	0	5.40268	0.144014	0	2.3792	2.12061	C	628.595	330	1.89694	0
2398	2014	2.07944	0.25	21.6123	2.3979	M	2.3979	3.2581	0.144014	1	2.37019	-0.290753	M	7.49554	3	2.70805	0.442478
2399	2014	2.30259	0.555556	23.0189	2.83321	C	0	1.09861	0.144014	0	2.3792	-0.0766167	C	628.595	330	1.90362	0.492611
2402	2014	5.63121	0.277778	20.9578	2.07944	C	1.38629	0	0.144014	1	2.3792	3.25201	C	628.595	330	1.89351	0.531915
2405	2014	3.85015	0.277778	21.8583	1.94591	I	0	0	0.144014	0	2.38211	1.46803	I	76.6579	20	3.83199	0.490196
2414	2014	1.60944	0.111111	21.6476	2.3979	C	0.693147	1.09861	0.144014	1	2.3792	-0.769764	C	628.595	330	1.90573	1.33333
2420	2014	2.30259	0.111111	22.0202	2.89037	C	3.93183	1.09861	0.144014	1	2.3792	-0.0766167	C	628.595	330	1.90362	0.595238
2422	2014	2.3979	0.75	23.7774	2.56495	C	5.83773	4.06044	0.144014	0	2.3792	0.0186935	C	628.595	330	1.90333	1.26582
2426	2014	0.693147	0.21875	22.3599	1.94591	C	2.30259	0	0.144014	0	2.3792	-1.68605	C	628.595	330	1.90852	0.645161
2427	2014	1.79176	0.5	21.6522	2.48491	C	0.693147	1.79176	0.144014	1	2.3792	-0.587442	C	628.595	330	1.90518	1.65746
2431	2014	2.48491	0.111111	22.96	1.94591	E	0	0	0.144014	0	2.3557	0.129205	E	25.7226	16	1.54918	0
2440	2014	3.7612	0.40625	22.7769	2.3979	C	0	3.68888	0.144014	0	2.3792	1.382	C	628.595	330	1.89919	0.534759
2444	2014	1.09861	0.222222	22.4147	2.63906	C	0	3.3322	0.144014	1	2.3792	-1.28059	C	628.595	330	1.90728	0.892857
2448	2014	1.79176	0.5	21.6365	3.21888	C	2.19722	3.29584	0.144014	0	2.3792	-0.587442	C	628.595	330	1.90518	0.775194
2456	2014	2.99573	0.3125	23.3734	2.07944	C	6.63726	6.55393	0.144014	0	2.3792	0.61653	C	628.595	330	1.90152	0
2460	2014	1.38629	0.277778	21.3934	2.70805	C	1.38629	1.09861	0.144014	1	2.3792	-0.992907	C	628.595	330	1.90641	2.67857
2463	2014	1.79176	0.222222	22.4183	3.13549	C	0	0	0.144014	0	2.3792	-0.587442	C	628.595	330	1.90518	0.558659
2465	2014	2.83321	0.0625	22.862	2.07944	C	0	0	0.144014	0	2.3792	0.454012	C	628.595	330	1.90201	0.347222
2466	2014	1.09861	7.5	22.5362	2.99573	C	0	0	0.144014	0	2.3792	-1.28059	C	628.595	330	1.90728	1.31579
2468	2014	3.13549	0.166667	21.2059	2.63906	C	0	3.61092	0.144014	0	2.3792	0.756292	C	628.595	330	1.90109	1.0101
2470	2014	2.19722	0.0625	23.1222	2.83321	C	0	2.30259	0.144014	1	2.3792	-0.181977	C	628.595	330	1.90394	2
2474	2014	4.27667	1	21.2457	2.07944	I	0	0	0.144014	1	2.38211	1.89455	I	76.6579	20	3.80954	1.44928
2488	2014	0.693147	0.75	21.9836	2.94444	C	0	1.60944	0.144014	1	2.3792	-1.68605	C	628.595	330	1.90852	1.20482
2496	2014	1.09861	0.25	22.2544	2.77259	C	0	3.4012	0.144014	1	2.3792	-1.28059	C	628.595	330	1.90728	0.8
2497	2014	3.97029	3	21.7917	2.63906	C	0	0	0.144014	0	2.3792	1.59109	C	628.595	330	1.89855	2.39234
2510	2014	1.38629	1	21.9784	2.94444	C	4.5326	2.94444	0.144014	0	2.3792	-0.992907	C	628.595	330	1.90641	1.25
2518	2014	2.89037	0.0625	21.498	3.09104	C	2.30259	2.30259	0.144014	1	2.3792	0.51117	C	628.595	330	1.90184	0.956938
2519	2014	2.19722	2	21.591	2.70805	C	0	2.56495	0.144014	0	2.3792	-0.181977	C	628.595	330	1.90394	2.48447
2527	2014	3.43399	0.222222	21.6294	2.99573	C	4.97673	3.93183	0.144014	1	2.3792	1.05479	C	628.595	330	1.90018	0.581395
2531	2014	0.693147	0.333333	21.8125	2.30259	C	0	1.09861	0.144014	1	2.3792	-1.68605	C	628.595	330	1.90852	2.23881
2532	2014	2.56495	1	21.1316	2.89037	C	3.46574	1.09861	0.144014	1	2.3792	0.185748	C	628.595	330	1.90283	0.625
2537	2014	3.13549	1	21.7119	2.3979	C	1.38629	0.693147	0.144014	1	2.3792	0.756292	C	628.595	330	1.90109	0.549451
2539	2014	1.09861	0.25	22.6217	2.99573	C	3.52636	0	0.144014	0	2.3792	-1.28059	C	628.595	330	1.90728	0.638298
2540	2014	1.60944	1	21.7299	2.63906	C	4.8828	2.63906	0.144014	0	2.3792	-0.769764	C	628.595	330	1.90573	0.348432
2543	2014	3.43399	0.111111	22.0467	2.48491	C	0	4.02535	0.144014	0	2.3792	1.05479	C	628.595	330	1.90018	0
2544	2014	4.17439	0.333333	21.8074	3.04452	I	0	6.12249	0.144014	0	2.38211	1.79227	I	76.6579	20	3.81492	2.05128
2551	2014	2.77259	0.25	21.5804	2.83321	C	2.48491	1.38629	0.144014	1	2.3792	0.393387	C	628.595	330	1.90219	0
2577	2014	2.48491	0.333333	21.3526	2.56495	C	3.13549	2.89037	0.144014	1	2.3792	0.105705	C	628.595	330	1.90307	0.492611
2579	2014	3.55535	0.111111	20.7777	2.70805	C	0	2.19722	0.144014	0	2.3792	1.17615	C	628.595	330	1.89982	2.29885
2583	2014	3.17805	0.722222	22.0157	3.09104	C	0	0	0.144014	1	2.3792	0.798852	C	628.595	330	1.90096	1.17188
2584	2014	0	0.25	21.2309	2.63906	C	0	1.09861	0.144014	0	2.3792	-2.3792	C	628.595	330	1.91062	0.512821
2587	2014	2.3979	1	20.4485	3.09104	C	0	3.55535	0.144014	0	2.3792	0.0186935	C	628.595	330	1.90333	0.403226
2593	2014	1.38629	0.222222	21.7625	2.99573	C	3.43399	0.693147	0.144014	1	2.3792	-0.992907	C	628.595	330	1.90641	1.2945
2598	2014	0.693147	0.166667	20.7166	2.19722	C	0	3.73767	0.144014	0	2.3792	-1.68605	C	628.595	330	1.90852	0
2603	2014	2.99573	0.222222	22.3501	2.63906	C	2.63906	3.29584	0.144014	0	2.3792	0.61653	C	628.595	330	1.90152	1.19048
2611	2014	2.70805	4	21.3989	2.94444	C	3.3673	2.48491	0.144014	0	2.3792	0.328848	C	628.595	330	1.90239	1.08696
2614	2014	1.79176	0.555556	21.9243	2.94444	C	4.04305	1.09861	0.144014	1	2.3792	-0.587442	C	628.595	330	1.90518	0.657895
2623	2014	2.19722	2	21.6784	2.19722	C	0	1.60944	0.144014	1	2.3792	-0.181977	C	628.595	330	1.90394	1.5
2630	2014	1.60944	1	22.6924	2.3979	C	2.3979	0	0.144014	0	2.3792	-0.769764	C	628.595	330	1.90573	0.787402
2635	2014	2.48491	6	21.5714	2.77259	C	3.2581	1.79176	0.144014	0	2.3792	0.105705	C	628.595	330	1.90307	0
2636	2014	0.693147	0.333333	21.5565	2.70805	C	3.43399	3.17805	0.144014	1	2.3792	-1.68605	C	628.595	330	1.90852	0
2638	2014	0	0.111111	21.9017	3.04452	C	5.7462	4.36945	0.144014	1	2.3792	-2.3792	C	628.595	330	1.91062	0.934579
2639	2014	1.60944	2	21.3466	2.70805	C	4.89784	1.38629	0.144014	1	2.3792	-0.769764	C	628.595	330	1.90573	0.649351
2642	2014	4.48864	0.111111	21.8896	2.63906	I	0	0	0.144014	0	2.38211	2.10652	I	76.6579	20	3.79838	0
2654	2014	2.89037	0.111111	20.6986	2.56495	C	2.99573	0	0.144014	0	2.3792	0.51117	C	628.595	330	1.90184	0.537634
2655	2014	3.3673	0.111111	20.7316	2.63906	C	0	0	0.144014	0	2.3792	0.988094	C	628.595	330	1.90039	1.10497
2659	2014	0	0.25	21.3951	2.77259	E	0	0	0.144014	0	2.3557	-2.3557	E	25.7226	16	1.71484	0
2663	2014	3.13549	3	22.4254	2.99573	E	0	1.38629	0.144014	0	2.3557	0.779793	E	25.7226	16	1.50581	0
2668	2014	1.60944	0.25	21.891	2.56495	C	0	2.19722	0.144014	0	2.3792	-0.769764	C	628.595	330	1.90573	1.25
2672	2014	1.38629	0.375	22.3298	2.77259	N	0	0	0.144014	0	2.37425	-0.987953	N	2.77259	2	1.38629	2.24719
2678	2014	1.09861	0.625	21.5875	3.8712	C	0	1.94591	0.144014	0	2.3792	-1.28059	C	628.595	330	1.90728	1.37615
2685	2014	0.693147	0.25	20.8104	2.3979	C	0	0	0.074502	0	2.3792	-1.68605	C	628.595	330	1.90852	0.684932
2688	2014	1.60944	0.25	21.1411	3.21888	C	0	0	0.074502	0	2.3792	-0.769764	C	628.595	330	1.90573	0.534759
2708	2014	0.693147	1	20.8447	3.04452	C	0.693147	1.79176	0.12407	0	2.3792	-1.68605	C	628.595	330	1.90852	0.847458
2715	2014	1.38629	1	20.3508	3.2581	C	0	0	0.12407	0	2.3792	-0.992907	C	628.595	330	1.90641	1.2931
2716	2014	1.94591	1	22.4532	2.3979	C	0.693147	2.99573	0.12407	0	2.3792	-0.433292	C	628.595	330	1.90471	0.83682
300002	2014	3.82864	0.944444	22.4347	2.63906	I	0	0	0.12407	0	2.38211	1.44653	I	76.6579	20	3.83312	0
300003	2014	1.79176	0.25	22.0661	1.94591	C	0	1.94591	0.12407	1	2.3792	-0.587442	C	628.595	330	1.90518	0
300012	2014	2.70805	0.04	21.1855	2.48491	M	4.14313	2.70805	0.12407	0	2.37019	0.337856	M	7.49554	3	2.39375	1.03093
300014	2014	1.94591	0.333333	21.2424	2.63906	C	5.17048	4.82028	0.12407	1	2.3792	-0.433292	C	628.595	330	1.90471	0
300017	2014	4.11087	0.1875	21.4052	2.70805	I	0	0	0.12407	1	2.38211	1.72876	I	76.6579	20	3.81827	0
300036	2014	4.06044	0.08	20.5788	2.89037	I	0	0	0.12407	0	2.38211	1.67833	I	76.6579	20	3.82092	0.664452
300037	2014	1.60944	0.04	21.2135	2.56495	C	0	3.3673	0.12407	0	2.3792	-0.769764	C	628.595	330	1.90573	0.632911
300042	2014	1.79176	0.04	20.5738	2.77259	C	0	0	0.12407	1	2.3792	-0.587442	C	628.595	330	1.90518	0.689655
300043	2014	2.07944	0.14	21.768	2.70805	C	2.77259	0.693147	0.12407	1	2.3792	-0.29976	C	628.595	330	1.9043	1.69492
300044	2014	3.3322	1	20.7163	2.89037	I	0	0	0.12407	1	2.38211	0.950091	I	76.6579	20	3.85925	0.497512
300045	2014	2.56495	0.04	20.7831	1.94591	C	1.60944	2.07944	0.12407	0	2.3792	0.185748	C	628.595	330	1.90283	0
300053	2014	2.94444	0.04	20.4364	2.70805	C	3.4012	0.693147	0.12407	1	2.3792	0.565237	C	628.595	330	1.90167	0
300057	2014	0	1.5	22.2271	2.83321	C	3.09104	0	0.12407	1	2.3792	-2.3792	C	628.595	330	1.91062	0.537634
300061	2014	1.38629	0.25	20.4612	2.94444	C	0	0	0.12407	1	2.3792	-0.992907	C	628.595	330	1.90641	0
300065	2014	4.14313	0.0625	20.532	2.63906	C	0	0	0.12407	1	2.3792	1.76393	C	628.595	330	1.89803	0.52356
300068	2014	2.77259	0.25	22.3059	2.89037	C	0	2.19722	0.12407	0	2.3792	0.393387	C	628.595	330	1.90219	0
300073	2014	1.60944	0.25	20.7412	2.63906	C	1.09861	2.56495	0.12407	0	2.3792	-0.769764	C	628.595	330	1.90573	0.949367
300077	2014	3.04452	0.5	21.776	2.70805	C	0	0	0.12407	0	2.3792	0.665321	C	628.595	330	1.90137	0.714286
300078	2014	3.55535	0.555556	20.9693	2.48491	C	0	2.56495	0.12407	1	2.3792	1.17615	C	628.595	330	1.89982	0
300083	2014	2.56495	0.222222	22.0483	2.48491	C	2.94444	3.8712	0.12407	0	2.3792	0.185748	C	628.595	330	1.90283	0
300084	2014	1.79176	0.28125	21.2083	2.70805	B	0	0	0.12407	0	2.36209	-0.570333	B	14.9911	12	1.19994	1.81818
300088	2014	2.56495	0.0625	21.983	2.19722	C	2.83321	1.79176	0.12407	0	2.3792	0.185748	C	628.595	330	1.90283	0
300093	2014	1.94591	0.15625	21.1909	3.04452	C	5.2575	2.19722	0.12407	1	2.3792	-0.433292	C	628.595	330	1.90471	3.26087
300094	2014	2.3979	0.625	21.7345	2.63906	A	1.79176	1.09861	0.12407	0	2.38807	0.00982365	A	5.23111	3	1.41661	0.581395
300105	2014	1.79176	0.111111	21.8804	2.83321	C	0	2.83321	0.12407	0	2.3792	-0.587442	C	628.595	330	1.90518	0
300115	2014	2.19722	0.75	22.0864	2.63906	C	0	0	0.12407	1	2.3792	-0.181977	C	628.595	330	1.90394	0
300121	2014	1.60944	1	20.9205	2.70805	C	1.94591	2.89037	0.12407	0	2.3792	-0.769764	C	628.595	330	1.90573	2.5
300123	2014	1.09861	0.333333	21.1	2.48491	C	1.38629	0	0.12407	1	2.3792	-1.28059	C	628.595	330	1.90728	2.43902
300124	2014	3.80666	0.333333	22.2647	2.48491	C	4.44265	2.77259	0.12407	1	2.3792	1.42746	C	628.595	330	1.89905	0.826446
300128	2014	2.07944	0.15625	22.0847	2.3979	C	4.99721	0	0.12407	1	2.3792	-0.29976	C	628.595	330	1.9043	0
300134	2014	3.82864	0.0625	21.9651	2.63906	C	5.70378	4.26268	0.12407	0	2.3792	1.44944	C	628.595	330	1.89898	0
300136	2014	1.79176	1.125	20.7687	2.19722	C	3.3322	2.70805	0.12407	0	2.3792	-0.587442	C	628.595	330	1.90518	0.869565
300138	2014	2.19722	0.0625	21.1342	2.70805	C	1.60944	3.04452	0.12407	1	2.3792	-0.181977	C	628.595	330	1.90394	0.429185
300139	2014	1.60944	0.333333	21.0159	2.70805	C	0	0.693147	0.12407	0	2.3792	-0.769764	C	628.595	330	1.90573	0.497512
300145	2014	2.19722	2	21.4421	3.17805	C	3.3322	1.79176	0.12407	0	2.3792	-0.181977	C	628.595	330	1.90394	0
300151	2014	2.77259	0.1875	20.6752	2.63906	C	2.77259	0	0.12407	0	2.3792	0.393387	C	628.595	330	1.90219	0
300153	2014	1.94591	0.125	20.8643	2.56495	C	0	1.94591	0.12407	0	2.3792	-0.433292	C	628.595	330	1.90471	0
300154	2014	2.19722	0.25	21.288	2.48491	C	2.77259	1.94591	0.12407	1	2.3792	-0.181977	C	628.595	330	1.90394	0
300155	2014	4.12713	1	21.0384	2.3979	C	3.71357	2.63906	0.12407	0	2.3792	1.74793	C	628.595	330	1.89808	0
300168	2014	4.30407	0.0625	22.0408	2.99573	I	0	0	0.12407	1	2.38211	1.92195	I	76.6579	20	3.8081	0
300169	2014	1.09861	0.625	21.3374	2.83321	C	0.693147	0.693147	0.12407	0	2.3792	-1.28059	C	628.595	330	1.90728	0
300170	2014	3.89182	0.1875	21.2885	2.56495	I	0	2.19722	0.12407	0	2.38211	1.50971	I	76.6579	20	3.8298	0
300171	2014	2.19722	0.125	22.1507	3.09104	C	4.66344	1.60944	0.12407	1	2.3792	-0.181977	C	628.595	330	1.90394	0
300177	2014	2.48491	0.111111	20.991	2.19722	C	2.07944	1.09861	0.12407	0	2.3792	0.105705	C	628.595	330	1.90307	0
300184	2014	3.17805	0.09375	20.6338	2.63906	F	1.38629	1.38629	0.12407	1	2.35517	0.822889	F	14.427	8	1.60699	0.540541
300188	2014	4.38203	1	20.9967	2.77259	I	2.07944	3.29584	0.12407	0	2.38211	1.99991	I	76.6579	20	3.804	0
300191	2014	1.60944	0.333333	20.9406	2.48491	B	0	1.09861	0.12407	1	2.36209	-0.752654	B	14.9911	12	1.21651	0
300193	2014	1.38629	0.5	21.4743	2.30259	C	1.38629	0.693147	0.12407	0	2.3792	-0.992907	C	628.595	330	1.90641	3.4188
300195	2014	2.30259	0.333333	21.7669	2.99573	C	3.29584	2.48491	0.12407	0	2.3792	-0.0766167	C	628.595	330	1.90362	0.380228
300199	2014	2.07944	0.75	21.2524	2.48491	C	1.09861	3.55535	0.12407	0	2.3792	-0.29976	C	628.595	330	1.9043	0.735294
300206	2014	3.13549	0.888889	21.0271	2.99573	C	4.30407	3.98898	0.12407	1	2.3792	0.756292	C	628.595	330	1.90109	0.555556
300207	2014	2.19722	0.166667	22.2945	2.89037	C	0	0	0.12407	1	2.3792	-0.181977	C	628.595	330	1.90394	0
300217	2014	1.38629	0.25	21.2364	2.70805	C	0	1.09861	0.12407	0	2.3792	-0.992907	C	628.595	330	1.90641	0
300219	2014	3.09104	0.111111	21.1755	2.3979	C	0	2.56495	0.12407	0	2.3792	0.711841	C	628.595	330	1.90123	0
300221	2014	1.38629	0.111111	20.9274	2.89037	C	0	2.77259	0.12407	0	2.3792	-0.992907	C	628.595	330	1.90641	0
300223	2014	3.13549	0.111111	20.7939	2.30259	C	0	0	0.12407	1	2.3792	0.756292	C	628.595	330	1.90109	0
300227	2014	1.79176	2	20.1902	2.30259	C	0.693147	2.07944	0.12407	1	2.3792	-0.587442	C	628.595	330	1.90518	0.492611
300228	2014	3.21888	0.25	21.9081	2.48491	C	3.29584	2.83321	0.12407	0	2.3792	0.839674	C	628.595	330	1.90084	0
300230	2014	1.60944	0.5	20.3741	2.56495	C	0	2.3979	0.12407	1	2.3792	-0.769764	C	628.595	330	1.90573	0.858369
300232	2014	3.21888	0.25	21.0144	2.3979	C	0	0	0.12407	1	2.3792	0.839674	C	628.595	330	1.90084	0
300234	2014	1.94591	0.25	20.4508	2.48491	C	1.79176	0	0.12407	0	2.3792	-0.433292	C	628.595	330	1.90471	1.63934
300238	2014	1.79176	0.111111	20.2445	2.77259	C	1.60944	0	0.12407	0	2.3792	-0.587442	C	628.595	330	1.90518	0
300245	2014	3.71357	0.222222	20.4836	2.63906	I	0	1.09861	0.12407	0	2.38211	1.33146	I	76.6579	20	3.83918	0
300250	2014	3.98898	1	20.013	2.77259	C	3.13549	1.79176	0.12407	1	2.3792	1.60978	C	628.595	330	1.8985	0
300260	2014	2.48491	1	20.6719	2.70805	C	1.60944	0	0.12407	1	2.3792	0.105705	C	628.595	330	1.90307	0.515464
300264	2014	2.56495	0.222222	20.3252	2.70805	I	0	0	0.12407	0	2.38211	0.182836	I	76.6579	20	3.89963	0.403226
300267	2014	1.09861	2.5	21.521	2.48491	C	0	0	0.12407	1	2.3792	-1.28059	C	628.595	330	1.90728	0
300273	2014	3.04452	0.111111	21.5967	2.94444	C	2.19722	1.60944	0.12407	1	2.3792	0.665321	C	628.595	330	1.90137	0.505051
300274	2014	1.38629	1.25	22.3083	2.89037	C	4.47734	4.59512	0.12407	1	2.3792	-0.992907	C	628.595	330	1.90641	0.641026
300279	2014	4.31749	0.25	20.7842	2.83321	C	1.94591	1.38629	0.12407	0	2.3792	1.93829	C	628.595	330	1.8975	0
300282	2014	2.19722	1	21.4512	2.48491	C	0	0	0.12407	0	2.3792	-0.181977	C	628.595	330	1.90394	0
300284	2014	2.70805	0.222222	22.1807	2.56495	M	0	0	0.12407	0	2.37019	0.337856	M	7.49554	3	2.39375	0
300292	2014	3.04452	2	21.0986	2.77259	C	1.94591	0	0.12407	0	2.3792	0.665321	C	628.595	330	1.90137	0.680272
300296	2014	2.30259	5.5	21.3941	2.99573	C	2.07944	3.80666	0.12407	1	2.3792	-0.0766167	C	628.595	330	1.90362	0
300317	2014	1.94591	1.25	21.0486	3.09104	C	2.48491	1.09861	0.12407	0	2.3792	-0.433292	C	628.595	330	1.90471	1.0582
300322	2014	1.94591	2	20.8397	2.3979	C	3.3673	1.09861	0.12407	0	2.3792	-0.433292	C	628.595	330	1.90471	0
300324	2014	4.20469	0.25	20.7722	2.89037	I	2.56495	1.60944	0.12407	1	2.38211	1.82258	I	76.6579	20	3.81333	2.52366
300327	2014	3.21888	0.25	20.2721	3.04452	C	0	1.94591	0.12407	0	2.3792	0.839674	C	628.595	330	1.90084	0
300328	2014	1.38629	0.5	20.5686	3.09104	C	1.38629	0.693147	0.12407	0	2.3792	-0.992907	C	628.595	330	1.90641	0.735294
300339	2014	3.71357	1.25	21.5407	2.19722	I	0	0.693147	0.12407	1	2.38211	1.33146	I	76.6579	20	3.83918	0
300341	2014	0.693147	0.25	20.243	2.56495	C	2.56495	0.693147	0.12407	0	2.3792	-1.68605	C	628.595	330	1.90852	1.90476
300357	2014	1.94591	3	20.0909	2.56495	C	0	1.09861	0.12407	1	2.3792	-0.433292	C	628.595	330	1.90471	0
300363	2014	1.38629	4	21.3411	2.30259	C	0	2.99573	0.12407	0	2.3792	-0.992907	C	628.595	330	1.90641	0.819672
300369	2014	2.83321	5	20.9247	2.70805	I	0	2.89037	0.12407	1	2.38211	0.4511	I	76.6579	20	3.88551	1.80723
300382	2014	1.09861	1	20.4887	2.3979	C	0	0	0.12407	1	2.3792	-1.28059	C	628.595	330	1.90728	0
600008	2014	1.79176	0.0138889	23.9491	2.77259	D	0	0.693147	0.12407	0	2.35397	-0.562213	D	3.73767	3	0.972955	1.92308
600010	2014	0	1	25.3644	2.77259	C	0	0	0.12407	0	2.3792	-2.3792	C	628.595	330	1.91062	0
600018	2014	3.04452	0.0247934	25.2695	3.29584	G	0	0	0.12407	0	2.37902	0.665503	G	3.04452	1		0
600028	2014	1.60944	0.0138889	28.0035	2.70805	B	0	0	0.12407	0	2.36209	-0.752654	B	14.9911	12	1.21651	0.628931
600031	2014	2.99573	0.160494	24.8666	2.70805	C	0	0	0.12407	0	2.3792	0.61653	C	628.595	330	1.90152	2.30769
600089	2014	1.60944	0.5	24.8057	3.09104	C	0	0	0.12407	0	2.3792	-0.769764	C	628.595	330	1.90573	2.45902
600100	2014	4.21951	0.450413	24.6298	2.89037	C	4.70953	4.90527	0.12407	0	2.3792	1.84031	C	628.595	330	1.8978	1.5544
600141	2014	1.09861	0.1875	23.7019	3.04452	C	0	0	0.12407	0	2.3792	-1.28059	C	628.595	330	1.90728	1.35135
600143	2014	1.79176	0.12	23.3434	3.09104	C	0	7.21524	0.12407	0	2.3792	-0.587442	C	628.595	330	1.90518	1.07527
600151	2014	1.79176	0.25	22.8908	2.83321	C	0	3.17805	0.12407	0	2.3792	-0.587442	C	628.595	330	1.90518	3.59712
600152	2014	0.693147	0.00888889	21.2931	3.09104	C	3.89182	2.19722	0.12407	0	2.3792	-1.68605	C	628.595	330	1.90852	0
600160	2014	1.79176	0.25	22.9157	2.83321	C	2.70805	2.99573	0.12407	0	2.3792	-0.587442	C	628.595	330	1.90518	1.45985
600169	2014	1.79176	0.333333	24.0411	2.83321	C	0	4.76217	0.12407	0	2.3792	-0.587442	C	628.595	330	1.90518	0.826446
600171	2014	1.60944	0.00826446	21.3415	2.83321	C	0	3.66356	0.12407	1	2.3792	-0.769764	C	628.595	330	1.90573	2.5641
600176	2014	1.60944	0.336735	23.6847	2.77259	C	4.23411	3.13549	0.12407	0	2.3792	-0.769764	C	628.595	330	1.90573	2.83688
600196	2014	1.09861	0.03	24.2882	3.04452	C	0	0	0.12407	0	2.3792	-1.28059	C	628.595	330	1.90728	0.333333
600202	2014	0	2	21.6847	3.09104	C	1.94591	0	0.12407	1	2.3792	-2.3792	C	628.595	330	1.91062	0
600216	2014	1.79176	0.0612245	22.7863	2.89037	C	0	0	0.12407	0	2.3792	-0.587442	C	628.595	330	1.90518	3.7234
600261	2014	2.30259	0.0454545	22.2147	2.89037	C	0	0	0.12407	0	2.3792	-0.0766167	C	628.595	330	1.90362	2.58065
600276	2014	0.693147	0.046875	22.9301	2.89037	C	0	0	0.12407	0	2.3792	-1.68605	C	628.595	330	1.90852	1.8018
600302	2014	1.09861	0.04	21.1907	2.77259	C	0	1.38629	0.12407	0	2.3792	-1.28059	C	628.595	330	1.90728	0
600309	2014	1.79176	0.132812	24.4512	2.83321	C	0	4.29046	0.12407	0	2.3792	-0.587442	C	628.595	330	1.90518	0.704225
600315	2014	1.09861	0.0138889	22.4341	2.99573	C	0	2.99573	0.12407	1	2.3792	-1.28059	C	628.595	330	1.90728	0.621118
600320	2014	1.60944	0.0902778	24.7512	3.13549	C	0	3.52636	0.12407	1	2.3792	-0.769764	C	628.595	330	1.90573	2.24719
600332	2014	0.693147	1	23.3773	2.89037	C	0	4.14313	0.12407	0	2.3792	-1.68605	C	628.595	330	1.90852	1.38889
600336	2014	2.07944	0.0123967	21.8242	2.83321	C	0	3.3673	0.12407	0	2.3792	-0.29976	C	628.595	330	1.9043	1.16279
600346	2014	1.38629	0.25	21.8235	2.77259	C	0	0	0.12407	0	2.3792	-0.992907	C	628.595	330	1.90641	1.47059
600363	2014	2.63906	0.01	21.8888	2.77259	C	3.46574	1.94591	0.12407	0	2.3792	0.259856	C	628.595	330	1.9026	1.75439
600409	2014	0	0.25	23.7203	2.77259	C	0	0	0.12407	0	2.3792	-2.3792	C	628.595	330	1.91062	1.92308
600429	2014	1.79176	0.00826446	22.1536	2.89037	C	0	1.60944	0.12407	0	2.3792	-0.587442	C	628.595	330	1.90518	0.675676
600438	2014	2.3979	0.0816327	22.5445	2.99573	C	0	0	0.12407	0	2.3792	0.0186935	C	628.595	330	1.90333	0
600439	2014	1.38629	0.0785124	22.1767	2.77259	C	3.3673	1.09861	0.12407	0	2.3792	-0.992907	C	628.595	330	1.90641	1.38889
600448	2014	1.79176	2	21.4741	2.77259	C	1.60944	2.99573	0.12407	1	2.3792	-0.587442	C	628.595	330	1.90518	0
600458	2014	1.09861	0.333333	23.0534	3.04452	C	4.8752	4.46591	0.12407	0	2.3792	-1.28059	C	628.595	330	1.90728	1.23457
600460	2014	2.19722	0.02	22.1141	2.89037	C	0	0	0.12407	0	2.3792	-0.181977	C	628.595	330	1.90394	0.917431
600478	2014	0.693147	0.16	21.6753	2.83321	C	0	0	0.12407	1	2.3792	-1.68605	C	628.595	330	1.90852	2.06186
600487	2014	1.94591	1	23.24	3.09104	C	0	4.43082	0.12407	0	2.3792	-0.433292	C	628.595	330	1.90471	1.65975
600491	2014	1.09861	0.112245	23.7603	2.99573	E	0	0	0.12407	0	2.3557	-1.25709	E	25.7226	16	1.6416	0.641026
600496	2014	0	0.204082	23.0045	2.77259	E	3.93183	1.79176	0.12407	0	2.3557	-2.3557	E	25.7226	16	1.71484	2.66667
600497	2014	0.693147	0.194444	24.2149	2.70805	B	2.07944	2.83321	0.12407	0	2.36209	-1.66894	B	14.9911	12	1.29981	1.90476
600499	2014	2.19722	0.0204082	22.7484	2.94444	C	6.63463	4.74493	0.12407	0	2.3792	-0.181977	C	628.595	330	1.90394	4.22535
600500	2014	1.38629	0.0909091	24.1282	2.83321	C	0	0	0.12407	0	2.3792	-0.992907	C	628.595	330	1.90641	1.02041
600501	2014	1.94591	0.111111	22.1369	2.77259	C	0	2.77259	0.12407	0	2.3792	-0.433292	C	628.595	330	1.90471	2.23881
600507	2014	1.09861	0.03125	22.9519	2.77259	C	0	0	0.12407	0	2.3792	-1.28059	C	628.595	330	1.90728	1.48148
600510	2014	1.38629	0.01	23.498	2.99573	K	0	1.60944	0.12407	0	2.37019	-0.9839	K	1.38629	1		1.49254
600522	2014	0	0.5	23.1913	2.77259	C	0	4.5326	0.12407	0	2.3792	-2.3792	C	628.595	330	1.91062	0.632911
600525	2014	0.693147	0.03125	22.5602	3.3673	C	0	4.77912	0.12407	0	2.3792	-1.68605	C	628.595	330	1.90852	0.763359
600526	2014	0.693147	0.0625	22.2838	2.70805	C	0	0	0.12407	0	2.3792	-1.68605	C	628.595	330	1.90852	3.38983
600535	2014	2.30259	0.03125	23.2821	2.83321	C	0	0	0.12407	0	2.3792	-0.0766167	C	628.595	330	1.90362	0.724638
600537	2014	0.693147	0.5	22.4033	3.43399	C	3.13549	3.04452	0.12407	1	2.3792	-1.68605	C	628.595	330	1.90852	2.5
600549	2014	0.693147	0.1875	23.575	2.89037	C	0	0	0.12407	0	2.3792	-1.68605	C	628.595	330	1.90852	2.17391
600557	2014	1.79176	0.03125	22.1476	2.94444	C	0	0	0.12407	1	2.3792	-0.587442	C	628.595	330	1.90518	3.44828
600580	2014	2.63906	0.3	23.005	2.83321	C	0	3.3322	0.12407	0	2.3792	0.259856	C	628.595	330	1.9026	1.03627
600583	2014	1.09861	0.153061	24.162	2.70805	B	0	4.18965	0.12407	0	2.36209	-1.26348	B	14.9911	12	1.26295	1.98413
600584	2014	1.38629	0.0308642	23.1122	2.70805	C	0	0	0.12407	0	2.3792	-0.992907	C	628.595	330	1.90641	1.5748
600588	2014	4.17439	0.00591716	22.8992	2.77259	I	0	0	0.12407	1	2.38211	1.79227	I	76.6579	20	3.81492	0.334448
600590	2014	3.71357	2	22.4848	2.94444	C	0	0	0.12407	0	2.3792	1.33437	C	628.595	330	1.89933	3.20856
600596	2014	0.693147	0.125	22.7994	3.09104	C	0	0	0.12407	0	2.3792	-1.68605	C	628.595	330	1.90852	0.729927
600619	2014	1.94591	2	22.881	3.13549	C	6.1334	5.32301	0.12407	0	2.3792	-0.433292	C	628.595	330	1.90471	0
600623	2014	1.60944	0.0178571	23.3916	3.13549	C	2.70805	1.38629	0.12407	0	2.3792	-0.769764	C	628.595	330	1.90573	1.29032
600630	2014	1.09861	0.00444444	21.5593	3.13549	C	2.56495	0	0.12407	0	2.3792	-1.28059	C	628.595	330	1.90728	2.9703
600637	2014	3.58352	1.25	22.5965	3.13549	I	0	3.21888	0.12407	0	2.38211	1.20141	I	76.6579	20	3.84602	1.42857
600651	2014	1.60944	0.0173611	22.4358	3.43399	C	0	2.94444	0.12407	0	2.3792	-0.769764	C	628.595	330	1.90573	0
600655	2014	0.693147	0.0703125	23.3502	3.13549	F	0	0	0.12407	0	2.35517	-1.66202	F	14.427	8	1.96198	2.77778
600703	2014	1.94591	0.75	23.5575	3.09104	C	0	0	0.12407	0	2.3792	-0.433292	C	628.595	330	1.90471	0
600718	2014	3.91202	0.0637755	22.9873	3.17805	I	0	0	0.12407	1	2.38211	1.52991	I	76.6579	20	3.82873	0
600796	2014	1.60944	0.0277778	20.8232	3.09104	C	0	0.693147	0.12407	1	2.3792	-0.769764	C	628.595	330	1.90573	2.01342
600797	2014	3.2581	0.00444444	22.2554	3.04452	I	0	2.19722	0.12407	0	2.38211	0.875983	I	76.6579	20	3.86315	1.73913
600808	2014	0.693147	0.0177778	24.9503	3.09104	C	0	0	0.12407	0	2.3792	-1.68605	C	628.595	330	1.90852	0.621118
600815	2014	1.38629	0.04	23.1247	3.04452	C	0	0	0.12407	0	2.3792	-0.992907	C	628.595	330	1.90641	4.30108
600820	2014	0	0.0118343	24.7977	3.09104	E	0	0	0.12407	0	2.3557	-2.3557	E	25.7226	16	1.71484	1.75439
600853	2014	0	0.222222	22.6464	3.09104	E	1.38629	1.09861	0.12407	0	2.3557	-2.3557	E	25.7226	16	1.71484	1.35135
600882	2014	0	0.5	21.2312	3.29584	B	0	0	0.12407	0	2.36209	-2.36209	B	14.9911	12	1.36283	4.34783
600884	2014	1.38629	0.08	22.9387	3.13549	C	0	0	0.12407	1	2.3792	-0.992907	C	628.595	330	1.90641	0.374532
600887	2014	2.83321	0.180556	24.3994	3.09104	C	0	0	0.12407	1	2.3792	0.454012	C	628.595	330	1.90201	0.404858
600893	2014	2.63906	0.0555556	24.5069	3.09104	C	0	6.00635	0.12407	0	2.3792	0.259856	C	628.595	330	1.9026	1.46341
600894	2014	2.94444	0.75	22.6805	3.09104	C	0	2.48491	0.12407	0	2.3792	0.565237	C	628.595	330	1.90167	0.510204
600895	2014	1.38629	0.00591716	23.5967	2.94444	S	0	0	0.12407	0	2.37826	-0.991968	S	1.38629	1		1.3986
600900	2014	1.94591	0.111111	25.7137	2.56495	D	0	0	0.12407	0	2.35397	-0.408062	D	3.73767	3	0.89588	3.94737
600970	2014	1.09861	1	23.9462	2.63906	C	0	0	0.12407	0	2.3792	-1.28059	C	628.595	330	1.90728	1.8018
600973	2014	2.70805	0.25	22.8716	2.70805	C	0	0	0.12407	1	2.3792	0.328848	C	628.595	330	1.90239	0
600997	2014	0.693147	0.08	23.8061	2.63906	C	0	1.94591	0.12407	0	2.3792	-1.68605	C	628.595	330	1.90852	0.806452
601012	2014	1.60944	0.25	22.5872	2.70805	C	0	2.07944	0.12407	0	2.3792	-0.769764	C	628.595	330	1.90573	1.65746
601058	2014	2.30259	2.125	23.3528	2.56495	C	0	0	0.12407	0	2.3792	-0.0766167	C	628.595	330	1.90362	0.719424
601088	2014	1.60944	0.0972222	27.001	2.3979	B	0	4.36945	0.12407	0	2.36209	-0.752654	B	14.9911	12	1.21651	3.5533
601101	2014	2.30259	0.111111	23.3803	2.56495	B	1.38629	0	0.12407	0	2.36209	-0.0595069	B	14.9911	12	1.1535	0.873362
601106	2014	2.07944	0.111111	24.4118	1.94591	C	0	4.14313	0.12407	0	2.3792	-0.29976	C	628.595	330	1.9043	0.4
601117	2014	1.94591	0.08	25.1226	1.94591	E	5.77455	4.40672	0.12407	0	2.3557	-0.409792	E	25.7226	16	1.58511	2.66667
601126	2014	3.17805	0.25	22.3477	3.04452	C	0	0	0.12407	0	2.3792	0.798852	C	628.595	330	1.90096	1.06952
601137	2014	1.79176	0.111111	21.7449	3.09104	C	0	3.95124	0.12407	0	2.3792	-0.587442	C	628.595	330	1.90518	0
601177	2014	2.94444	0.125	22.0896	2.89037	C	0	1.38629	0.12407	0	2.3792	0.565237	C	628.595	330	1.90167	3.04569
601179	2014	2.56495	0.04	24.1542	1.94591	C	0	0	0.12407	0	2.3792	0.185748	C	628.595	330	1.90283	1.93798
601216	2014	2.94444	1	23.2283	2.48491	C	0	0	0.12407	1	2.3792	0.565237	C	628.595	330	1.90167	0.763359
601222	2014	2.83321	0.25	22.2042	2.99573	C	0	1.94591	0.12407	1	2.3792	0.454012	C	628.595	330	1.90201	2.38908
601238	2014	1.09861	2.125	24.8555	2.89037	C	0	4.91998	0.12407	0	2.3792	-1.28059	C	628.595	330	1.90728	2.51572
601339	2014	0.693147	1.125	23.0457	2.3979	C	2.3979	1.79176	0.12407	0	2.3792	-1.68605	C	628.595	330	1.90852	3.4188
601515	2014	1.09861	0.166667	22.1411	3.46574	C	2.83321	2.3979	0.12407	0	2.3792	-1.28059	C	628.595	330	1.90728	0.847458
601599	2014	0	0.25	21.9099	2.56495	C	1.38629	0	0.12407	0	2.3792	-2.3792	C	628.595	330	1.91062	0
601600	2014	1.09861	0.0306122	25.984	2.63906	C	0	0	0.12407	0	2.3792	-1.28059	C	628.595	330	1.90728	0.42735
601607	2014	2.07944	0.04	24.8875	3.04452	F	0	4.54329	0.12407	0	2.35517	-0.275724	F	14.427	8	1.76394	1.0101
601608	2014	1.94591	1.25	23.7106	3.46574	C	0	4.69135	0.12407	0	2.3792	-0.433292	C	628.595	330	1.90471	0.584795
601618	2014	1.94591	0.18	26.5101	1.94591	E	0	7.34343	0.12407	0	2.3557	-0.409792	E	25.7226	16	1.58511	4.19162
601668	2014	1.94591	0.12	27.5467	2.07944	E	0	5.24702	0.12407	0	2.3557	-0.409792	E	25.7226	16	1.58511	0.900901
601718	2014	1.60944	4.5	23.756	1.79176	C	0	5.15906	0.12407	0	2.3792	-0.769764	C	628.595	330	1.90573	0.913242
601766	2014	2.63906	0.0555556	25.7377	2.07944	C	0	0	0.12407	0	2.3792	0.259856	C	628.595	330	1.9026	1.40449
601777	2014	0.693147	0.1875	23.7602	2.89037	C	0	4.30407	0.12407	0	2.3792	-1.68605	C	628.595	330	1.90852	0.657895
601800	2014	0.693147	0.555556	27.1696	2.19722	E	0	0	0.12407	0	2.3557	-1.66255	E	25.7226	16	1.66863	1.50943
601857	2014	1.09861	0.0204082	28.5087	2.77259	B	0	0	0.12407	0	2.36209	-1.26348	B	14.9911	12	1.26295	0
601886	2014	1.60944	2.66667	23.7101	2.77259	E	4.07754	2.48491	0.12407	0	2.3557	-0.746264	E	25.7226	16	1.60755	4.2735
601890	2014	0	0.0625	22.0584	2.70805	C	0	2.30259	0.12407	0	2.3792	-2.3792	C	628.595	330	1.91062	0
601898	2014	1.09861	0.0204082	26.2151	2.19722	B	0	4.5326	0.12407	0	2.36209	-1.26348	B	14.9911	12	1.26295	0.84507
601958	2014	0.693147	0.0204082	23.5065	2.07944	B	0	0	0.12407	0	2.36209	-1.66894	B	14.9911	12	1.29981	0.813008
601991	2014	0	0.03125	26.4351	3.04452	D	0	0	0.12407	0	2.35397	-2.35397	D	3.73767	3	1.86883	0.854701
601992	2014	1.09861	0.0625	25.4741	2.30259	C	0	0	0.12407	0	2.3792	-1.28059	C	628.595	330	1.90728	5.67376
603002	2014	0	0.25	21.0949	2.99573	C	0	1.09861	0.12407	0	2.3792	-2.3792	C	628.595	330	1.91062	4.3956
603699	2014	0	8	22.1284	2.56495	C	9.1185	10.2499	0.12407	0	2.3792	3.3792	C	628.595	330	3.91062	0
12	2015	1.38629	0.00390625	23.4742	3.46574	C	0	4.04305	0.12407	0	2.3792	-0.992907	C	863.097	455	1.89804	1.94175
21	2015	1.38629	0.0253906	23.3861	3.13549	C	4.15888	2.83321	0.12407	0	2.3792	-0.992907	C	863.097	455	1.89804	0.869565
26	2015	2.19722	0.0546875	22.1694	3.3673	F	3.4012	1.38629	0.12407	0	2.35517	-0.157941	F	18.0825	7	2.64755	1.72414
45	2015	1.09861	0.00390625	21.8116	3.52636	C	2.07944	1.09861	-0.02311	1	2.3792	-1.28059	C	863.097	455	1.89867	0
49	2015	2.07944	0.0972222	21.9478	3.04452	C	0	0	-0.02311	0	2.3792	-0.29976	C	863.097	455	1.89651	1.47059
50	2015	2.77259	0.0413223	23.7973	3.49651	C	5.52146	7.39756	-0.02311	0	2.3792	0.393387	C	863.097	455	1.89499	0
55	2015	1.38629	0.0102041	22.2193	3.09104	C	0	4.2485	-0.02311	1	2.3792	-0.992907	C	863.097	455	1.89804	2.43902
65	2015	0.693147	1.125	22.613	3.46574	E	2.77259	0.693147	-0.023502	0	2.3557	-1.66255	E	28.8432	19	1.56389	1.13636
78	2015	1.60944	0.03125	23.2698	3.17805	F	0	0	-0.023502	0	2.35517	-0.745727	F	18.0825	7	2.74552	0
90	2015	2.77259	0.00444444	23.5299	3.13549	E	2.99573	2.48491	-0.023502	0	2.3557	0.416887	E	28.8432	19	1.44837	2.17391
100	2015	3.43399	0.145833	25.4396	2.63906	C	0	7.93057	0.12407	1	2.3792	1.05479	C	863.097	455	1.89353	1.42857
157	2015	2.19722	0.0650888	25.2636	2.83321	C	0	0	0.12407	1	2.3792	-0.181977	C	863.097	455	1.89625	3.2
158	2015	3.78419	0.04	23.1159	2.89037	C	0	2.30259	0.12407	0	2.3792	1.40499	C	863.097	455	1.89276	0.769231
333	2015	3.04452	1.625	25.5819	2.77259	C	9.88827	7.28139	0.053259	1	2.3792	0.665321	C	863.097	455	3.89439	4.30108
338	2015	1.79176	0.102041	25.4671	2.63906	C	0	3.04452	0.053259	1	2.3792	-0.587442	C	863.097	455	1.89715	3.2
404	2015	1.94591	0.111111	22.665	3.09104	C	0	0	0.053259	0	2.3792	-0.433292	C	863.097	455	1.89681	2.3622
410	2015	1.38629	0.0123457	23.8274	3.13549	C	0	0	0.053259	0	2.3792	-0.992907	C	863.097	455	1.89804	0
423	2015	1.09861	0.04	22.8761	3.13549	C	3.85015	3.49651	0.053259	0	2.3792	-1.28059	C	863.097	455	1.89867	1.38889
528	2015	1.09861	0.0991736	23.738	3.13549	C	0	4.59512	-0.02311	0	2.3792	-1.28059	C	863.097	455	1.89867	2.7027
536	2015	1.60944	0.08	22.9174	3.55535	C	2.77259	2.89037	-0.02311	0	2.3792	-0.769764	C	863.097	455	1.89755	1.10497
566	2015	1.38629	0.111111	22.3089	3.17805	C	0	3.3673	-0.02311	0	2.3792	-0.992907	C	863.097	455	1.89804	0.757576
589	2015	1.09861	0.04	23.137	2.99573	C	1.09861	0.693147	-0.02311	0	2.3792	-1.28059	C	863.097	455	1.89867	0
601	2015	1.38629	0.0277778	22.8642	3.13549	D	0	1.60944	-0.023502	0	2.35397	-0.967678	D	3.46574	4	0.693147	0
625	2015	1.38629	0.0740741	25.2165	2.99573	C	6.59304	6.12249	-0.023502	0	2.3792	-0.992907	C	863.097	455	1.89804	1.69492
630	2015	1.09861	0.111111	24.5113	3.17805	C	0	0	-0.023502	0	2.3792	-1.28059	C	863.097	455	1.89867	1.6129
636	2015	2.48491	0.0612245	22.6085	3.09104	C	0	0	-0.023502	0	2.3792	0.105705	C	863.097	455	1.89562	0
651	2015	2.77259	0.0136719	25.809	3.29584	C	0	8.85993	-0.023502	1	2.3792	0.393387	C	863.097	455	1.89499	3.44828
670	2015	3.13549	3.5	20.353	3.29584	C	0	0	-0.023502	1	2.3792	0.756292	C	863.097	455	1.89419	1.16279
676	2015	1.94591	0.01	19.5603	2.99573	C	2.83321	1.79176	-0.023502	1	2.3792	-0.433292	C	863.097	455	1.89681	1.08696
680	2015	1.94591	0.53125	22.9639	3.13549	C	0	0	-0.023502	0	2.3792	-0.433292	C	863.097	455	1.89681	2.1978
681	2015	3.04452	0.0330579	21.7422	3.13549	R	1.94591	1.38629	-0.023502	0	2.41925	0.625275	R	7.47534	3	2.21541	3.33333
701	2015	3.78419	0.0173611	23.3766	3.17805	F	3.2581	0.693147	-0.023502	0	2.35517	1.42902	F	18.0825	7	2.38306	0.452489
709	2015	1.38629	0.01	25.9096	3.09104	C	0	5.23111	-0.023502	0	2.3792	-0.992907	C	863.097	455	1.89804	3.84615
725	2015	2.83321	0.00444444	25.751	3.13549	C	0	0	-0.023502	0	2.3792	0.454012	C	863.097	455	1.89485	1.96078
726	2015	2.07944	0.0295858	22.9306	3.13549	C	0	0	-0.023502	1	2.3792	-0.29976	C	863.097	455	1.89651	4.12371
731	2015	1.94591	0.0612245	22.3491	3.09104	C	0	0	-0.023502	0	2.3792	-0.433292	C	863.097	455	1.89681	5.26316
756	2015	1.38629	0.0138889	22.2256	3.13549	C	0	2.77259	-0.023502	0	2.3792	-0.992907	C	863.097	455	1.89804	0
778	2015	0.693147	0.12	24.6526	2.94444	C	0	5.20401	-0.023502	0	2.3792	-1.68605	C	863.097	455	1.89957	0
810	2015	3.7612	3	22.3851	3.3322	C	3.68888	5.50533	-0.023502	0	2.3792	1.382	C	863.097	455	1.89281	0.840336
816	2015	4.02535	0.03125	22.6143	2.94444	C	0	2.77259	-0.023502	0	2.3792	1.64615	C	863.097	455	1.89223	2.29008
821	2015	2.48491	0.0555556	21.7451	3.13549	C	2.99573	1.09861	-0.023502	1	2.3792	0.105705	C	863.097	455	1.89562	0
837	2015	1.79176	0.0123967	22.6304	2.89037	C	0	2.19722	-0.023502	0	2.3792	-0.587442	C	863.097	455	1.89715	0
850	2015	1.79176	0.25	22.8717	2.89037	C	4.44265	4.54329	-0.023502	0	2.3792	-0.587442	C	863.097	455	1.89715	1.69492
852	2015	1.09861	0.111111	22.7218	2.89037	C	0	3.13549	-0.023502	0	2.3792	-1.28059	C	863.097	455	1.89867	0
863	2015	0.693147	0.375	23.3242	2.94444	K	0	1.09861	-0.023502	0	2.37019	-1.67705	K	5.68358	3	2.49522	3.63636
887	2015	1.38629	0.255102	22.7343	2.89037	C	0	3.63759	-0.023502	0	2.3792	-0.992907	C	863.097	455	1.89804	2.7027
910	2015	0.693147	6.5	22.5913	2.83321	C	3.13549	2.48491	-0.023502	0	2.3792	-1.68605	C	863.097	455	1.89957	2.5974
925	2015	2.07944	0.0277778	22.1839	2.83321	C	3.29584	3.43399	-0.023502	1	2.3792	-0.29976	C	863.097	455	1.89651	0.534759
928	2015	2.70805	2	23.3219	3.13549	E	0	1.94591	-0.023502	0	2.3557	0.352348	E	28.8432	19	1.45195	0
932	2015	2.56495	0.15625	25.0605	2.83321	C	0	3.7612	-0.023502	0	2.3792	0.185748	C	863.097	455	1.89544	3.07692
957	2015	0	1	22.6776	3.09104	C	0	0	-0.023502	0	2.3792	-2.3792	C	863.097	455	1.90109	1.02041
960	2015	1.09861	0.0243056	24.041	2.89037	C	0	0	-0.023502	0	2.3792	-1.28059	C	863.097	455	1.89867	7.46269
962	2015	1.60944	0.222222	21.8765	2.83321	C	0	0	-0.023502	0	2.3792	-0.769764	C	863.097	455	1.89755	0
967	2015	1.79176	1	22.4203	3.13549	C	0	0	-0.023502	0	2.3792	-0.587442	C	863.097	455	1.89715	3.14961
988	2015	3.98898	0.0111111	22.3338	2.83321	C	0	0	-0.023502	0	2.3792	1.60978	C	863.097	455	1.89231	0
990	2015	1.60944	0.166667	22.3183	2.89037	C	0	0	-0.023502	0	2.3792	-0.769764	C	863.097	455	1.89755	0
999	2015	1.94591	0.00765306	23.2098	2.83321	C	2.56495	4.20469	-0.023502	0	2.3792	-0.433292	C	863.097	455	1.89681	4.8
2001	2015	1.09861	0.0206612	22.9979	2.83321	C	0	0	0.12407	0	2.3792	-1.28059	C	863.097	455	1.89867	6.81818
2003	2015	0.693147	0.09375	21.4902	2.77259	C	5.273	3.66356	0.12407	0	2.3792	-1.68605	C	863.097	455	1.89957	3.07692
2004	2015	2.48491	0.722222	23.7044	2.70805	C	2.56495	4.07754	0.12407	1	2.3792	0.105705	C	863.097	455	1.89562	5.49451
2008	2015	1.79176	0.0826446	22.7491	2.70805	C	7.25771	6.00635	0.12407	1	2.3792	-0.587442	C	863.097	455	1.89715	0.961538
2011	2015	2.07944	0.0859375	23.0605	2.70805	C	0	0	0.12407	0	2.3792	-0.29976	C	863.097	455	1.89651	2.73973
2021	2015	1.09861	0.0416667	21.2217	3.09104	C	3.97029	3.04452	0.12407	1	2.3792	-1.28059	C	863.097	455	1.89867	0.598802
2023	2015	1.79176	0.166667	22.2364	2.77259	C	2.30259	0.693147	0.12407	0	2.3792	-0.587442	C	863.097	455	1.89715	1.27119
2030	2015	2.07944	0.0833333	21.8357	2.70805	C	1.94591	1.38629	0.12407	0	2.3792	-0.29976	C	863.097	455	1.89651	0.877193
2031	2015	2.94444	0.40625	22.1978	2.70805	C	3.80666	2.30259	0.12407	0	2.3792	0.565237	C	863.097	455	1.89461	0.833333
2032	2015	0.693147	0.015625	22.7242	2.89037	C	0	2.07944	0.12407	0	2.3792	-1.68605	C	863.097	455	1.89957	0
2042	2015	1.38629	0.0972222	22.9637	2.77259	C	0	0	0.12407	0	2.3792	-0.992907	C	863.097	455	1.89804	5.47945
2043	2015	2.56495	0.0625	20.8765	2.70805	C	2.63906	3.58352	0.12407	0	2.3792	0.185748	C	863.097	455	1.89544	2.6087
2045	2015	1.94591	0.03	21.7802	3.13549	C	3.29584	1.09861	0.12407	0	2.3792	-0.433292	C	863.097	455	1.89681	1.72414
2049	2015	2.56495	3.5	22.1414	2.70805	C	0	0	0.12407	0	2.3792	0.185748	C	863.097	455	1.89544	0
2056	2015	2.30259	0.1875	22.3602	2.83321	C	5.49306	4.63473	0.12407	1	2.3792	-0.0766167	C	863.097	455	1.89602	1.42857
2062	2015	0	0.0204082	23.4244	3.09104	E	2.77259	0.693147	0.12407	0	2.3557	-2.3557	E	28.8432	19	1.6024	2.38095
2067	2015	1.09861	0.03125	22.4669	2.70805	C	1.09861	0.693147	0.12407	0	2.3792	-1.28059	C	863.097	455	1.89867	2.23881
2068	2015	0.693147	1	22.5725	2.70805	C	3.4012	0	0.12407	0	2.3792	-1.68605	C	863.097	455	1.89957	1.78571
2069	2015	2.56495	0.142857	22.2241	2.70805	A	0	0	0.12407	1	2.38807	0.176878	A	6.06146	3	1.74825	0
2079	2015	2.30259	0.0694444	21.1218	3.2581	C	2.3979	2.3979	0.12407	1	2.3792	-0.0766167	C	863.097	455	1.89602	0.526316
2081	2015	2.3979	0.777778	23.9343	3.13549	E	0	4.70953	0.12407	0	2.3557	0.0421936	E	28.8432	19	1.46918	0
2084	2015	3.3673	0.0246914	21.3329	2.56495	C	2.83321	1.94591	0.12407	0	2.3792	0.988094	C	863.097	455	1.89368	0
2085	2015	1.09861	0.135802	22.9033	2.70805	C	0	0	0.12407	0	2.3792	-1.28059	C	863.097	455	1.89867	4.49438
2086	2015	1.09861	0.04	22.0497	2.70805	A	0	0	0.12407	1	2.38807	-1.28946	A	6.06146	3	2.48142	0.571429
2090	2015	3.98898	0.1875	21.695	3.04452	C	0.693147	2.30259	0.12407	0	2.3792	1.60978	C	863.097	455	1.89231	1.37931
2091	2015	0	0.03125	22.0436	2.89037	F	0	3.17805	0.12407	0	2.35517	-2.35517	F	18.0825	7	3.01376	0
2094	2015	0	0.0246914	21.3745	2.94444	C	4.61512	0.693147	0.12407	0	2.3792	-2.3792	C	863.097	455	1.90109	1.21951
2098	2015	1.60944	0.0277778	21.1132	3.17805	C	4.33073	3.55535	0.12407	0	2.3792	-0.769764	C	863.097	455	1.89755	0
2099	2015	1.79176	0.125	22.2983	2.48491	C	0	0	0.12407	0	2.3792	-0.587442	C	863.097	455	1.89715	3.63636
2101	2015	2.3979	0.25	21.7391	2.77259	C	3.3673	2.19722	0.12407	0	2.3792	0.0186935	C	863.097	455	1.89581	0
2105	2015	0.693147	0.0246914	20.9958	2.56495	C	4.79579	0.693147	0.12407	0	2.3792	-1.68605	C	863.097	455	1.89957	0
2106	2015	2.3979	0.015625	22.1775	2.77259	C	4.84419	4.69135	0.12407	0	2.3792	0.0186935	C	863.097	455	1.89581	0.892857
2111	2015	1.79176	0.0277778	21.9289	2.63906	C	4.91265	3.4012	0.12407	0	2.3792	-0.587442	C	863.097	455	1.89715	0.819672
2115	2015	2.83321	0.0510204	21.4497	2.48491	C	4.63473	3.80666	0.12407	0	2.3792	0.454012	C	863.097	455	1.89485	1.05263
2120	2015	1.38629	0.0612245	20.6399	2.99573	C	0	0	0.12407	0	2.3792	-0.992907	C	863.097	455	1.89804	2.5641
2121	2015	2.07944	3	23.0567	2.77259	C	0	0	0.12407	1	2.3792	-0.29976	C	863.097	455	1.89651	1.4652
2123	2015	3.21888	0.333333	22.7166	2.89037	C	0	0	0.12407	1	2.3792	0.839674	C	863.097	455	1.894	0
2126	2015	1.09861	0.0972222	22.0905	2.83321	C	5.04343	3.4012	0.12407	0	2.3792	-1.28059	C	863.097	455	1.89867	0
2129	2015	0	0.111111	23.7717	2.89037	C	0	5.16479	0.12407	0	2.3792	-2.3792	C	863.097	455	1.90109	1.40845
2130	2015	2.30259	0.0204082	22.0242	2.89037	C	0	0	0.12407	0	2.3792	-0.0766167	C	863.097	455	1.89602	0.625
2138	2015	1.09861	0.03125	21.8987	2.3979	C	2.94444	4.18965	0.12407	0	2.3792	-1.28059	C	863.097	455	1.89867	0
2151	2015	2.83321	0.0390625	22.0561	2.77259	C	0	0	0.12407	0	2.3792	0.454012	C	863.097	455	1.89485	0
2152	2015	2.94444	0.112245	22.7645	2.83321	C	0	0	0.12407	0	2.3792	0.565237	C	863.097	455	1.89461	1.81818
2156	2015	1.60944	0.0234375	22.5969	3.09104	C	0	0	0.12407	0	2.3792	-0.769764	C	863.097	455	1.89755	1.38889
2158	2015	2.30259	0.125	21.547	2.89037	C	4.04305	1.60944	0.12407	1	2.3792	-0.0766167	C	863.097	455	1.89602	3.65854
2160	2015	0	0.25	22.2733	2.48491	C	0.693147	0.693147	0.12407	0	2.3792	-2.3792	C	863.097	455	1.90109	0
2161	2015	4.27667	0.666667	21.3549	2.56495	C	5.46383	3.66356	0.12407	0	2.3792	1.89746	C	863.097	455	1.89167	2.4
2163	2015	1.38629	0.0510204	22.6721	3.04452	E	0	3.09104	0.12407	1	2.3557	-0.969407	E	28.8432	19	1.52538	0.833333
2165	2015	1.38629	0.015625	21.3069	3.09104	C	2.07944	3.61092	0.12407	0	2.3792	-0.992907	C	863.097	455	1.89804	2.42915
2166	2015	1.09861	0.0625	21.4313	2.77259	C	0	3.73767	0.12407	1	2.3792	-1.28059	C	863.097	455	1.89867	2.85714
2167	2015	1.79176	0.06	21.7201	3.04452	C	0	0.693147	0.12407	0	2.3792	-0.587442	C	863.097	455	1.89715	0
2171	2015	1.38629	0.25	21.766	2.63906	C	0	2.56495	0.12407	1	2.3792	-0.992907	C	863.097	455	1.89804	1.91083
2177	2015	2.99573	0.125	21.5617	2.70805	C	3.80666	0	0.12407	1	2.3792	0.61653	C	863.097	455	1.8945	0.961538
2180	2015	6.07944	8	21.8609	2.48491	C	5.31812	5.0814	0.12407	0	2.3792	3.29976	C	863.097	455	1.89651	2.42424
2182	2015	1.79176	0.015625	21.7978	3.13549	C	3.09104	2.3979	0.12407	1	2.3792	-0.587442	C	863.097	455	1.89715	0
2185	2015	3.29584	2	22.6789	2.56495	C	0	0	0.12407	0	2.3792	0.916635	C	863.097	455	1.89383	0
2188	2015	2.19722	0.0204082	21.5262	2.30259	C	3.58352	0.693147	0.12407	0	2.3792	-0.181977	C	863.097	455	1.89625	1.44928
2191	2015	2.94444	0.0390625	22.4032	2.99573	C	0	3.3673	0.12407	0	2.3792	0.565237	C	863.097	455	1.89461	2.06186
2194	2015	3.21888	0.0277778	21.6381	3.29584	C	4.94164	2.94444	0.12407	1	2.3792	0.839674	C	863.097	455	1.894	0
2196	2015	2.63906	0.111111	21.7388	2.70805	C	1.79176	1.38629	0.12407	0	2.3792	0.259856	C	863.097	455	1.89528	1.13636
2201	2015	1.09861	0.25	21.4829	3.09104	C	2.99573	2.48491	0.12407	1	2.3792	-1.28059	C	863.097	455	1.89867	0
2202	2015	1.60944	0.101562	24.6855	2.70805	C	0	4.81218	0.12407	0	2.3792	-0.769764	C	863.097	455	1.89755	0.684932
2203	2015	2.07944	0.09375	22.9446	2.70805	C	0	0	0.12407	0	2.3792	-0.29976	C	863.097	455	1.89651	0
2204	2015	1.60944	0.1875	23.564	3.13549	C	0	0	0.12407	0	2.3792	-0.769764	C	863.097	455	1.89755	2.58621
2209	2015	3.09104	0.111111	21.1991	2.89037	C	4.33073	3.46574	0.12407	1	2.3792	0.711841	C	863.097	455	1.89429	0
2218	2015	1.09861	0.09375	22.1698	2.19722	C	0	0	0.12407	0	2.3792	-1.28059	C	863.097	455	1.89867	3.2967
2225	2015	0.693147	0.0612245	22.3632	2.63906	C	0	0	0.12407	0	2.3792	-1.68605	C	863.097	455	1.89957	2.73973
2227	2015	2.70805	0.0204082	20.7327	2.89037	C	0	0	0.12407	1	2.3792	0.328848	C	863.097	455	1.89513	5.74713
2236	2015	3.91202	0.8125	23.1659	2.63906	C	5.26269	4.99043	0.12407	1	2.3792	1.53282	C	863.097	455	1.89248	1.51515
2237	2015	0	2	23.1904	3.09104	C	2.19722	2.07944	0.12407	0	2.3792	-2.3792	C	863.097	455	1.90109	5.47945
2239	2015	0.693147	0.244898	22.6246	2.63906	C	0	3.13549	0.12407	0	2.3792	-1.68605	C	863.097	455	1.89957	1.51515
2241	2015	3.55535	0.22449	23.6807	2.70805	C	0	6.61204	0.12407	0	2.3792	1.17615	C	863.097	455	1.89326	0
2242	2015	1.60944	1	22.4966	2.63906	C	6.14204	3.97029	0.12407	1	2.3792	-0.769764	C	863.097	455	1.89755	0
2243	2015	2.19722	0.0204082	21.2867	2.19722	C	2.99573	3.09104	0.12407	0	2.3792	-0.181977	C	863.097	455	1.89625	0
2245	2015	1.09861	0.0625	21.6347	2.19722	G	0	2.94444	0.12407	0	2.37902	-1.28041	G	6.12249	3	2.51194	2.5
2248	2015	0.693147	0.111111	21.4936	2.48491	C	4.91265	3.17805	0.12407	0	2.3792	-1.68605	C	863.097	455	1.89957	1.3245
2249	2015	2.30259	0.193878	22.7522	2.30259	C	0	0	0.12407	0	2.3792	-0.0766167	C	863.097	455	1.89602	1.49254
2255	2015	0	0.1	22.0214	2.77259	C	1.60944	0.693147	0.12407	1	2.3792	-2.3792	C	863.097	455	1.90109	0
2256	2015	2.07944	1	21.3452	3.04452	C	0	1.09861	0.12407	0	2.3792	-0.29976	C	863.097	455	1.89651	2.5
2261	2015	5.60947	0.25	22.1873	2.70805	I	0	2.07944	0.12407	1	2.38211	3.22736	I	133.506	32	4.12568	0
2262	2015	2.30259	1	21.6597	2.83321	C	0	1.09861	0.12407	0	2.3792	-0.0766167	C	863.097	455	1.89602	2.32558
2266	2015	0	0.1875	22.3743	2.48491	C	4.02535	2.30259	0.12407	1	2.3792	-2.3792	C	863.097	455	1.90109	3.36134
2271	2015	2.3979	0.25	22.5289	2.89037	C	0	0	0.12407	0	2.3792	0.0186935	C	863.097	455	1.89581	1.28205
2272	2015	0.693147	1	21.2761	2.94444	C	1.38629	2.07944	0.12407	0	2.3792	-1.68605	C	863.097	455	1.89957	2.83019
2276	2015	2.94444	0.25	22.3414	2.99573	C	3.46574	1.94591	0.12407	0	2.3792	0.565237	C	863.097	455	1.89461	1.30435
2278	2015	1.38629	0.111111	21.2815	3.13549	C	5.14166	3.93183	0.12407	0	2.3792	-0.992907	C	863.097	455	1.89804	1.19048
2281	2015	2.70805	0.25	22.162	2.48491	C	3.61092	4.47734	0.12407	0	2.3792	0.328848	C	863.097	455	1.89513	0.980392
2282	2015	2.89037	0.138889	20.7586	2.89037	C	0	2.70805	0.12407	0	2.3792	0.51117	C	863.097	455	1.89473	0.884956
2293	2015	2.99573	0.0277778	21.9717	2.19722	C	0	0	0.12407	0	2.3792	0.61653	C	863.097	455	1.8945	1.5873
2294	2015	1.60944	0.08	22.4072	2.89037	C	1.79176	1.94591	0.12407	0	2.3792	-0.769764	C	863.097	455	1.89755	2.73973
2295	2015	1.09861	0.04	20.9508	2.3979	C	1.79176	0	0.12407	0	2.3792	-1.28059	C	863.097	455	1.89867	3.2967
2300	2015	2.19722	1	21.8379	3.09104	C	1.79176	0.693147	0.12407	1	2.3792	-0.181977	C	863.097	455	1.89625	0
2301	2015	2.63906	0.0416667	21.6167	2.77259	C	2.94444	2.83321	0.12407	1	2.3792	0.259856	C	863.097	455	1.89528	2.04082
2303	2015	3.21888	0.0694444	21.8947	2.19722	C	5.1985	3.97029	0.12407	1	2.3792	0.839674	C	863.097	455	1.894	0
2311	2015	1.09861	0.54	22.8255	2.19722	C	3.71357	4.64439	0.12407	1	2.3792	-1.28059	C	863.097	455	1.89867	0
2313	2015	1.60944	0.166667	22.2054	2.56495	C	0	2.56495	0.12407	1	2.3792	-0.769764	C	863.097	455	1.89755	1.40845
2314	2015	1.38629	0.04	23.1556	2.70805	E	4.04305	1.38629	0.12407	0	2.3557	-0.969407	E	28.8432	19	1.52538	0
2318	2015	1.79176	0.0277778	22.0169	2.48491	C	2.94444	3.04452	0.12407	0	2.3792	-0.587442	C	863.097	455	1.89715	0
2326	2015	2.77259	0.111111	21.9579	2.19722	C	0	2.70805	0.12407	0	2.3792	0.393387	C	863.097	455	1.89499	1.0989
2328	2015	1.09861	0.12	22.0812	2.94444	C	4.92725	1.79176	0.12407	1	2.3792	-1.28059	C	863.097	455	1.89867	0
2332	2015	2.07944	0.0625	21.9584	2.77259	C	0	1.60944	0.12407	0	2.3792	-0.29976	C	863.097	455	1.89651	5.17241
2340	2015	2.77259	0.14	23.4921	2.30259	C	0	0	0.12407	1	2.3792	0.393387	C	863.097	455	1.89499	2.17391
2342	2015	1.09861	0.1875	22.0788	2.48491	C	3.17805	2.3979	0.12407	0	2.3792	-1.28059	C	863.097	455	1.89867	2.7027
2345	2015	1.09861	0.0277778	22.1994	2.30259	C	5.02388	1.94591	0.12407	0	2.3792	-1.28059	C	863.097	455	1.89867	1.23457
2348	2015	1.38629	0.0277778	20.9398	3.29584	C	3.3673	0	0.12407	1	2.3792	-0.992907	C	863.097	455	1.89804	0
2351	2015	1.60944	0.125	21.3602	2.70805	C	4.46591	1.09861	0.12407	1	2.3792	-0.769764	C	863.097	455	1.89755	0.595238
2354	2015	1.79176	1.05556	22.7119	2.56495	I	0.693147	1.60944	0.12407	1	2.38211	-0.590354	I	133.506	32	4.24883	2.66667
2355	2015	2.48491	1	21.8995	2.83321	C	2.77259	0.693147	0.12407	1	2.3792	0.105705	C	863.097	455	1.89562	2.27273
2365	2015	0	0.222222	20.9081	2.30259	C	0	1.79176	0.12407	0	2.3792	-2.3792	C	863.097	455	1.90109	1.90476
2371	2015	1.60944	0.06	22.1535	2.70805	C	0	4.85981	0.12407	0	2.3792	-0.769764	C	863.097	455	1.89755	2.54237
2375	2015	3.61092	0.25	23.6365	2.19722	E	0	2.07944	0.12407	0	2.3557	1.25522	E	28.8432	19	1.40179	3.31126
2376	2015	3.04452	0.06	21.8503	2.63906	C	0	5.01728	0.12407	0	2.3792	0.665321	C	863.097	455	1.89439	0.574713
2382	2015	1.09861	0.15625	21.1269	2.19722	C	0	1.38629	0.12407	0	2.3792	-1.28059	C	863.097	455	1.89867	0
2383	2015	3.71357	0.24	21.6355	2.19722	C	2.48491	3.29584	0.12407	1	2.3792	1.33437	C	863.097	455	1.89291	0
2385	2015	2.48491	0.166667	23.3515	2.19722	C	0	0	0.12407	1	2.3792	0.105705	C	863.097	455	1.89562	1.07527
2386	2015	2.3979	0.111111	23.3237	3.09104	C	0	0	0.12407	0	2.3792	0.0186935	C	863.097	455	1.89581	1.20482
2394	2015	1.09861	0.375	22.2211	2.63906	C	1.94591	2.3979	0.12407	0	2.3792	-1.28059	C	863.097	455	1.89867	1.85185
2396	2015	4.46591	0.0625	22.3992	2.99573	C	0	5.97889	0.12407	0	2.3792	2.08671	C	863.097	455	1.89126	0
2398	2015	2.30259	0.111111	21.6306	2.48491	M	2.70805	3.43399	0.12407	1	2.37019	-0.0676092	M	12.0269	6	1.94487	2.0202
2399	2015	1.79176	0.40625	23.2221	2.89037	C	0	0	0.12407	0	2.3792	-0.587442	C	863.097	455	1.89715	0
2402	2015	5.8999	0.15625	21.0581	2.19722	C	5.64191	5.47646	0.12407	1	2.3792	3.5207	C	863.097	455	1.8881	1.69492
2409	2015	0	0.12	21.2597	2.94444	C	0	1.94591	0.12407	1	2.3792	-2.3792	C	863.097	455	1.90109	1.11111
2414	2015	2.70805	0.0625	21.9285	2.48491	C	2.48491	2.70805	0.12407	1	2.3792	0.328848	C	863.097	455	1.89513	2.66667
2420	2015	1.94591	0.15625	22.123	2.94444	C	3.2581	0.693147	0.12407	1	2.3792	-0.433292	C	863.097	455	1.89681	1.33333
2422	2015	1.94591	0.333333	23.8405	2.63906	C	7.46049	5.39363	0.12407	0	2.3792	-0.433292	C	863.097	455	1.89681	4.8951
2426	2015	2.19722	0.2	23.1487	2.07944	C	5.273	3.52636	0.12407	0	2.3792	-0.181977	C	863.097	455	1.89625	0.746269
2427	2015	0.693147	0.333333	21.844	2.56495	C	0	0	0.12407	1	2.3792	-1.68605	C	863.097	455	1.89957	2.24719
2431	2015	0.693147	0.34375	23.2284	2.07944	E	0	0	0.12407	0	2.3557	-1.66255	E	28.8432	19	1.56389	2.73973
2432	2015	2.63906	0.34375	20.5247	3.04452	C	4.68213	2.99573	0.12407	0	2.3792	0.259856	C	863.097	455	1.89528	0.884956
2436	2015	1.38629	0.3125	22.057	2.83321	C	4.61512	4.81218	0.12407	1	2.3792	-0.992907	C	863.097	455	1.89804	0
2440	2015	3.68888	0.26	22.7501	2.48491	C	0.693147	3.55535	0.12407	0	2.3792	1.30968	C	863.097	455	1.89297	2.30769
2442	2015	0.693147	1	21.7637	2.07944	C	1.38629	1.94591	0.12407	0	2.3792	-1.68605	C	863.097	455	1.89957	2.5
2444	2015	2.07944	0.15625	22.4327	2.70805	C	0	0	0.12407	1	2.3792	-0.29976	C	863.097	455	1.89651	0
2448	2015	1.60944	0.222222	21.677	3.2581	C	0	0	0.12407	0	2.3792	-0.769764	C	863.097	455	1.89755	0
2449	2015	2.3979	2	22.2031	3.55535	C	0	3.80666	0.12407	0	2.3792	0.0186935	C	863.097	455	1.89581	0.694444
2456	2015	2.70805	0.2	23.5001	2.19722	C	0	0	0.12407	0	2.3792	0.328848	C	863.097	455	1.89513	0
2459	2015	1.09861	0.125	21.0255	2.07944	C	0	0	0.12407	0	2.3792	-1.28059	C	863.097	455	1.89867	3.44828
2460	2015	1.09861	0.15625	21.6505	2.77259	C	2.30259	2.30259	0.12407	1	2.3792	-1.28059	C	863.097	455	1.89867	4.16667
2463	2015	1.94591	0.125	22.4162	3.17805	C	0	0.693147	0.12407	0	2.3792	-0.433292	C	863.097	455	1.89681	1.85185
2465	2015	2.99573	0.04	23.0153	2.19722	C	4.99043	3.17805	0.12407	0	2.3792	0.61653	C	863.097	455	1.8945	0.431034
2466	2015	0.693147	2.125	22.7403	3.04452	C	0.693147	1.60944	0.12407	0	2.3792	-1.68605	C	863.097	455	1.89957	0
2467	2015	2.94444	1.05556	21.6891	2.56495	I	0	0.693147	0.12407	0	2.38211	0.562325	I	133.506	32	4.21165	0
2468	2015	2.83321	0.09375	21.1746	2.70805	C	0	2.48491	0.12407	1	2.3792	0.454012	C	863.097	455	1.89485	1.14943
2470	2015	2.56495	0.08	23.1733	2.89037	C	0	0	0.12407	1	2.3792	0.185748	C	863.097	455	1.89544	1.66667
2474	2015	4.69135	0.25	21.3685	2.19722	I	0	0	0.12407	1	2.38211	2.30923	I	133.506	32	4.1553	0.990099
2475	2015	1.09861	0.5625	23.1732	2.48491	C	0	0	0.12407	1	2.3792	-1.28059	C	863.097	455	1.89867	0
2476	2015	0	2	21.1601	2.99573	C	0	0	0.12407	0	2.3792	-2.3792	C	863.097	455	1.90109	1.75439
2483	2015	0.693147	2	22.2276	2.56495	C	0	0	0.12407	1	2.3792	-1.68605	C	863.097	455	1.89957	0.724638
2494	2015	1.09861	1.25	21.5561	1.94591	C	2.63906	1.94591	0.12407	0	2.3792	-1.28059	C	863.097	455	1.89867	0
2496	2015	1.38629	0.111111	22.5433	2.83321	C	0	2.48491	0.12407	1	2.3792	-0.992907	C	863.097	455	1.89804	0.961538
2497	2015	4.31749	1	21.7857	2.70805	C	0	2.63906	0.12407	0	2.3792	1.93829	C	863.097	455	1.89158	2.28571
2510	2015	1.38629	0.25	22.0365	2.99573	C	4.77068	2.99573	0.12407	0	2.3792	-0.992907	C	863.097	455	1.89804	2.29885
2518	2015	2.99573	0.04	21.6494	3.13549	C	0	0	0.12407	1	2.3792	0.61653	C	863.097	455	1.8945	1.15607
2519	2015	2.19722	1.375	21.9979	2.77259	C	0	3.09104	0.12407	0	2.3792	-0.181977	C	863.097	455	1.89625	6.15385
2521	2015	0.693147	0.25	22.1336	2.70805	C	0	0	0.12407	0	2.3792	-1.68605	C	863.097	455	1.89957	0
2522	2015	1.94591	0.166667	21.3277	2.70805	C	0	1.38629	0.12407	1	2.3792	-0.433292	C	863.097	455	1.89681	0
2527	2015	3.49651	0.1875	21.9509	3.04452	C	5.1985	4.17439	0.12407	1	2.3792	1.11731	C	863.097	455	1.89339	0
2531	2015	2.07944	0.21875	22.2587	2.3979	C	0	0	0.12407	1	2.3792	-0.29976	C	863.097	455	1.89651	1.0989
2532	2015	2.3979	0.25	21.2092	2.94444	C	3.04452	0.693147	0.12407	1	2.3792	0.0186935	C	863.097	455	1.89581	0.632911
2537	2015	2.94444	0.25	21.7409	2.48491	C	1.09861	0.693147	0.12407	1	2.3792	0.565237	C	863.097	455	1.89461	2.0202
2539	2015	1.79176	0.111111	22.9055	3.04452	C	3.21888	2.63906	0.12407	0	2.3792	-0.587442	C	863.097	455	1.89715	0.966184
2540	2015	1.09861	0.25	21.85	2.70805	C	5.02388	2.89037	0.12407	0	2.3792	-1.28059	C	863.097	455	1.89867	0
2543	2015	3.21888	0.0625	22.1716	2.56495	C	5.01728	3.52636	0.12407	0	2.3792	0.839674	C	863.097	455	1.894	1.2987
2544	2015	3.68888	0.1875	21.9797	3.09104	I	0	6.24998	0.12407	0	2.38211	1.30677	I	133.506	32	4.18763	1.43885
2547	2015	1.94591	0.375	21.9795	2.70805	C	4.11087	2.3979	0.12407	1	2.3792	-0.433292	C	863.097	455	1.89681	0
2551	2015	2.3979	0.166667	21.8079	2.89037	C	3.73767	2.19722	0.12407	1	2.3792	0.0186935	C	863.097	455	1.89581	0.826446
2555	2015	1.94591	7.5	22.2544	3.04452	C	3.95124	2.30259	0.12407	0	2.3792	-0.433292	C	863.097	455	1.89681	0
2557	2015	1.94591	0.111111	22.2451	2.70805	C	1.94591	2.56495	0.12407	1	2.3792	-0.433292	C	863.097	455	1.89681	3.52941
2559	2015	2.3979	0.0625	21.4355	2.77259	C	0	1.38629	0.12407	0	2.3792	0.0186935	C	863.097	455	1.89581	0.840336
2570	2015	2.19722	0.5	22.3954	2.83321	C	1.09861	2.3979	0.12407	0	2.3792	-0.181977	C	863.097	455	1.89625	4.49438
2575	2015	0.693147	0.0625	20.6843	2.99573	C	4.02535	0.693147	0.12407	0	2.3792	-1.68605	C	863.097	455	1.89957	1.51515
2577	2015	1.79176	0.375	21.239	2.63906	C	4.07754	2.83321	0.12407	1	2.3792	-0.587442	C	863.097	455	1.89715	0.568182
2579	2015	2.99573	0.0625	20.9554	2.77259	C	0	0	0.12407	1	2.3792	0.61653	C	863.097	455	1.8945	3.05344
2583	2015	2.56495	0.40625	22.2501	3.13549	C	0	0	0.12407	1	2.3792	0.185748	C	863.097	455	1.89544	2.1978
2584	2015	2.19722	0.111111	21.5951	2.70805	C	0	1.38629	0.12407	0	2.3792	-0.181977	C	863.097	455	1.89625	0
2587	2015	1.38629	0.25	20.367	3.13549	C	0	2.94444	0.12407	0	2.3792	-0.992907	C	863.097	455	1.89804	0.70922
2593	2015	3.21888	0.125	21.8127	3.04452	C	3.43399	0.693147	0.12407	1	2.3792	0.839674	C	863.097	455	1.894	2.61438
2598	2015	1.94591	0.0625	20.7053	2.30259	C	0	0	0.12407	0	2.3792	-0.433292	C	863.097	455	1.89681	0
2599	2015	2.07944	0.111111	20.936	2.77259	C	1.94591	0	0.12407	0	2.3792	-0.29976	C	863.097	455	1.89651	1.5625
2601	2015	1.38629	3	22.4744	2.89037	C	2.07944	1.60944	0.12407	0	2.3792	-0.992907	C	863.097	455	1.89804	0
2603	2015	2.77259	0.1875	22.465	2.70805	C	0	2.48491	0.12407	0	2.3792	0.393387	C	863.097	455	1.89499	4.54545
2611	2015	2.70805	1	21.6352	2.99573	C	4.81218	2.83321	0.12407	0	2.3792	0.328848	C	863.097	455	1.89513	0
2612	2015	2.48491	0.15625	21.7489	2.30259	C	2.56495	0.693147	0.12407	0	2.3792	0.105705	C	863.097	455	1.89562	0
2614	2015	1.38629	0.8125	22.0905	2.99573	C	5.56452	3.2581	0.12407	1	2.3792	-0.992907	C	863.097	455	1.89804	1.17647
2616	2015	2.07944	0.0625	21.7894	3.13549	C	0	0	0.12407	0	2.3792	-0.29976	C	863.097	455	1.89651	1.06383
2626	2015	1.60944	5.5	21.7433	2.94444	C	0	1.79176	0.12407	1	2.3792	-0.769764	C	863.097	455	1.89755	1.38889
2629	2015	0.693147	1	20.533	2.30259	B	1.09861	2.19722	0.12407	0	2.36209	-1.66894	B	17.484	15	1.19934	1.5625
2630	2015	0.693147	0.625	22.9389	2.48491	C	0	1.60944	0.12407	0	2.3792	-1.68605	C	863.097	455	1.89957	1.35135
2635	2015	3.21888	1.5	21.8507	2.83321	C	3.49651	2.30259	0.12407	0	2.3792	0.839674	C	863.097	455	1.894	1.02041
2636	2015	0.693147	0.1875	21.7117	2.77259	C	3.61092	3.3673	0.12407	1	2.3792	-1.68605	C	863.097	455	1.89957	1.02041
2637	2015	0	1	21.4959	2.77259	C	1.94591	2.3979	0.12407	1	2.3792	-2.3792	C	863.097	455	1.90109	2.7027
2638	2015	2.77259	0.0625	21.8991	3.09104	C	5.61313	4.54329	0.12407	1	2.3792	0.393387	C	863.097	455	1.89499	2.17391
2642	2015	4.99043	0.0625	22.2622	2.70805	I	0	2.83321	0.12407	0	2.38211	2.60832	I	133.506	32	4.14565	0.793651
2649	2015	4.00733	0.78125	21.5852	3.04452	I	0	1.60944	0.12407	0	2.38211	1.62522	I	133.506	32	4.17736	0.632911
2651	2015	2.19722	1	21.6386	2.83321	C	0	3.49651	0.12407	0	2.3792	-0.181977	C	863.097	455	1.89625	1.0582
2653	2015	2.48491	1	21.895	2.3979	C	0.693147	4.65396	0.12407	1	2.3792	0.105705	C	863.097	455	1.89562	1.83486
2654	2015	2.83321	0.1875	21.4591	2.63906	C	3.7612	2.48491	0.12407	0	2.3792	0.454012	C	863.097	455	1.89485	0
2655	2015	1.94591	0.0625	20.8676	2.70805	C	0	0	0.12407	0	2.3792	-0.433292	C	863.097	455	1.89681	1.96078
2657	2015	3.80666	1	21.6745	2.56495	I	0	0	0.12407	0	2.38211	1.42455	I	133.506	32	4.18383	0
2659	2015	0	0.111111	21.6651	2.83321	E	0	0	0.12407	1	2.3557	-2.3557	E	28.8432	19	1.6024	4.7619
2660	2015	1.94591	0.111111	21.3439	2.30259	C	4.70953	2.83321	0.12407	1	2.3792	-0.433292	C	863.097	455	1.89681	0.724638
2662	2015	1.09861	0.111111	22.6507	2.63906	C	4.29046	2.56495	0.12407	1	2.3792	-1.28059	C	863.097	455	1.89867	1.40845
2663	2015	2.63906	0.75	22.5853	3.04452	E	1.09861	0	0.12407	0	2.3557	0.283356	E	28.8432	19	1.45579	2.8169
2666	2015	0	0.111111	21.8906	3.17805	C	0	2.3979	0.12407	0	2.3792	-2.3792	C	863.097	455	1.90109	0
2668	2015	2.70805	0.111111	22.1894	2.63906	C	5.23644	2.56495	0.12407	1	2.3792	0.328848	C	863.097	455	1.89513	0
2672	2015	1.60944	0.166667	22.6232	2.83321	N	0	0	0.12407	0	2.37425	-0.764809	N	1.60944	1		2.27273
2674	2015	1.09861	1	21.6593	3.17805	C	2.3979	3.2581	0.12407	0	2.3792	-1.28059	C	863.097	455	1.89867	0.854701
2675	2015	0	0.222222	21.6585	2.89037	C	0	2.83321	0.12407	1	2.3792	-2.3792	C	863.097	455	1.90109	4.7619
2676	2015	1.79176	0.111111	21.2054	3.17805	C	3.7612	2.3979	0.12407	1	2.3792	-0.587442	C	863.097	455	1.89715	0
2678	2015	2.19722	0.277778	21.6251	3.89182	C	0	2.07944	0.12407	1	2.3792	-0.181977	C	863.097	455	1.89625	1.6129
2685	2015	2.3979	0.222222	20.9	2.48491	C	0	0	0.12407	0	2.3792	0.0186935	C	863.097	455	1.89581	1.16279
2689	2015	2.3979	1.5	21.6736	2.70805	C	3.7612	2.56495	0.12407	0	2.3792	0.0186935	C	863.097	455	1.89581	0
2695	2015	2.89037	1	21.3265	2.83321	C	2.83321	0	0.12407	0	2.3792	0.51117	C	863.097	455	1.89473	0
2708	2015	0.693147	0.25	20.8327	3.09104	C	4.26268	1.79176	0.089575	0	2.3792	-1.68605	C	863.097	455	1.89957	2.7027
2715	2015	1.79176	0.25	20.3917	3.29584	C	2.89037	1.94591	0.089575	0	2.3792	-0.587442	C	863.097	455	1.89715	2.65487
2716	2015	1.94591	0.25	22.5452	2.48491	C	0	3.80666	0.089575	0	2.3792	-0.433292	C	863.097	455	1.89681	2.27273
2724	2015	1.94591	1	21.2908	3.04452	C	5.99645	7.50329	0.089575	1	2.3792	-0.433292	C	863.097	455	1.89681	4.54545
2729	2015	1.38629	1	20.0546	3.17805	C	0	0	0.053259	0	2.3792	-0.992907	C	863.097	455	1.89804	1.06383
2733	2015	1.60944	5.5	21.5318	3.09104	C	4.2485	3.61092	0.053259	1	2.3792	-0.769764	C	863.097	455	1.89755	3.2967
2734	2015	0	2	20.864	2.99573	C	0	0.693147	0.053259	0	2.3792	-2.3792	C	863.097	455	1.90109	2.1978
2738	2015	0.693147	7	20.4702	2.83321	M	2.3979	0	0.053259	0	2.37019	-1.67705	M	12.0269	6	2.26676	3.07692
2745	2015	1.09861	2.5	22.7616	2.94444	C	5.40717	2.56495	0.053259	1	2.3792	-1.28059	C	863.097	455	1.89867	0
2747	2015	3.4012	3	20.4267	2.63906	C	0	3.80666	0.053259	1	2.3792	1.022	C	863.097	455	1.8936	1.08696
300002	2015	4.00733	0.75	22.4993	2.70805	I	0	0	0.053259	0	2.38211	1.62522	I	133.506	32	4.17736	0
300006	2015	1.09861	1	21.8556	2.83321	C	0	1.79176	0.053259	1	2.3792	-1.28059	C	863.097	455	1.89867	5.17241
300012	2015	3.09104	0.0277778	21.359	2.56495	M	4.18965	3.3673	0.053259	0	2.37019	0.720848	M	12.0269	6	1.78718	1.45985
300014	2015	2.30259	0.15625	21.6347	2.70805	C	5.82895	5.73334	0.053259	1	2.3792	-0.0766167	C	863.097	455	1.89602	0
300017	2015	4.49981	0.16	21.9777	2.77259	I	0	0	0.053259	1	2.38211	2.1177	I	133.506	32	4.16148	0
300027	2015	1.79176	0.625	23.6077	2.48491	R	0	0	0.053259	0	2.41925	-0.627488	R	7.47534	3	2.84179	1.41343
300030	2015	2.19722	2	21.0875	2.99573	C	2.56495	1.09861	0.053259	1	2.3792	-0.181977	C	863.097	455	1.89625	4.04624
300036	2015	3.93183	0.0555556	20.7596	2.94444	I	1.09861	1.94591	0.053259	0	2.38211	1.54971	I	133.506	32	4.1798	0.925926
300037	2015	1.94591	0.0277778	21.5606	2.63906	C	0	0	0.053259	0	2.3792	-0.433292	C	863.097	455	1.89681	0.909091
300042	2015	1.79176	0.0277778	20.5983	2.83321	C	0	2.63906	0.053259	0	2.3792	-0.587442	C	863.097	455	1.89715	0.502513
300044	2015	3.73767	0.25	20.9552	2.94444	I	0	0	0.053259	1	2.38211	1.35556	I	133.506	32	4.18606	2.94118
300045	2015	3.17805	0.0277778	20.87	2.07944	C	2.30259	3.3322	0.053259	0	2.3792	0.798852	C	863.097	455	1.89409	0
300050	2015	3.66356	0.0277778	21.6117	2.70805	I	0	2.77259	0.053259	0	2.38211	1.28145	I	133.506	32	4.18845	0
300051	2015	3.98898	0.0277778	21.0386	2.48491	I	0.693147	0	0.053259	1	2.38211	1.60687	I	133.506	32	4.17795	1.72414
300053	2015	3.80666	0.0277778	21.1275	2.77259	C	4.26268	1.94591	0.053259	1	2.3792	1.42746	C	863.097	455	1.89271	0
300057	2015	1.09861	0.375	22.2353	2.89037	C	3.82864	1.38629	0.053259	1	2.3792	-1.28059	C	863.097	455	1.89867	0
300061	2015	1.94591	0.16	20.538	2.99573	C	3.3322	2.19722	0.053259	1	2.3792	-0.433292	C	863.097	455	1.89681	0.505051
300065	2015	4.06044	0.12	21.2284	2.70805	C	0	0	0.053259	1	2.3792	1.68124	C	863.097	455	1.89215	0.471698
300068	2015	2.3979	0.16	22.6594	2.94444	C	1.94591	2.56495	0.053259	0	2.3792	0.0186935	C	863.097	455	1.89581	0
300073	2015	2.56495	0.111111	21.2776	2.70805	C	0	1.09861	0.053259	0	2.3792	0.185748	C	863.097	455	1.89544	0
300077	2015	2.94444	0.28125	21.8863	2.77259	C	2.94444	4.35671	0.053259	0	2.3792	0.565237	C	863.097	455	1.89461	0
300078	2015	4.85981	0.3125	21.6222	2.56495	C	3.73767	1.60944	0.053259	0	2.3792	2.48061	C	863.097	455	1.89039	0.507614
300079	2015	3.09104	0.277778	22.1388	2.77259	C	3.3673	3.80666	0.053259	1	2.3792	0.711841	C	863.097	455	1.89429	0
300083	2015	3.3673	0.125	22.8949	2.56495	C	5.60947	3.85015	0.053259	0	2.3792	0.988094	C	863.097	455	1.89368	0.440529
300084	2015	0	0.18	21.2469	2.77259	B	3.82864	2.63906	0.053259	0	2.36209	-2.36209	B	17.484	15	1.24885	2.67857
300085	2015	5.22575	1	20.8875	2.19722	I	3.66356	2.77259	0.053259	0	2.38211	2.84363	I	133.506	32	4.13806	0
300093	2015	1.38629	0.1	21.2088	3.09104	C	5.33754	2.19722	0.053259	1	2.3792	-0.992907	C	863.097	455	1.89804	14.2857
300094	2015	2.3979	0.277778	21.6773	2.70805	A	1.79176	1.38629	0.053259	0	2.38807	0.00982365	A	6.06146	3	1.83178	0.877193
300105	2015	0.693147	0.0625	21.7504	2.89037	C	5.11799	4.20469	0.053259	0	2.3792	-1.68605	C	863.097	455	1.89957	0
300111	2015	0	0.36	21.8478	2.3979	C	0	1.94591	0.053259	1	2.3792	-2.3792	C	863.097	455	1.90109	7.69231
300115	2015	2.63906	0.333333	22.3494	2.70805	C	0	0	0.053259	0	2.3792	0.259856	C	863.097	455	1.89528	1.20482
300118	2015	1.38629	0.24	22.8617	1.94591	C	3.3673	2.70805	0.053259	0	2.3792	-0.992907	C	863.097	455	1.89804	1.9802
300121	2015	1.09861	0.25	20.9394	2.77259	C	2.83321	3.63759	0.053259	1	2.3792	-1.28059	C	863.097	455	1.89867	2.15054
300122	2015	0.693147	1	21.7097	3.04452	C	0	2.56495	0.053259	1	2.3792	-1.68605	C	863.097	455	1.89957	3.25203
300123	2015	0.693147	0.1875	21.3127	2.56495	C	5.64545	2.19722	0.053259	1	2.3792	-1.68605	C	863.097	455	1.89957	4.02685
300124	2015	4.04305	0.1875	22.5061	2.56495	C	4.59512	3.95124	0.053259	1	2.3792	1.66385	C	863.097	455	1.89219	1.53846
300128	2015	2.48491	0.1	21.9216	2.48491	C	4.8752	3.46574	0.053259	1	2.3792	0.105705	C	863.097	455	1.89562	0
300129	2015	1.09861	0.09375	21.8579	2.70805	C	2.19722	0	0.053259	0	2.3792	-1.28059	C	863.097	455	1.89867	2.43902
300131	2015	5.83773	0.277778	21.645	2.07944	F	2.94444	2.19722	0.053259	0	2.35517	3.48257	F	18.0825	7	2.0408	1.67598
300132	2015	0	0.0625	20.6206	2.70805	C	1.79176	0	0.053259	0	2.3792	-2.3792	C	863.097	455	1.90109	0.769231
300134	2015	3.52636	0.06	22.1933	2.70805	C	4.70953	3.4012	0.053259	0	2.3792	1.14716	C	863.097	455	1.89333	0.60241
300135	2015	0	0.5	21.7506	2.63906	C	2.30259	2.99573	0.053259	0	2.3792	-2.3792	C	863.097	455	1.90109	2.6087
300136	2015	1.38629	0.5	21.3896	2.30259	C	0	3.80666	0.053259	0	2.3792	-0.992907	C	863.097	455	1.89804	1
300139	2015	1.09861	0.28125	21.084	2.77259	C	0	1.60944	0.053259	0	2.3792	-1.28059	C	863.097	455	1.89867	2.12766
300145	2015	0.693147	0.5	22.4028	3.21888	C	0	3.58352	0.053259	0	2.3792	-1.68605	C	863.097	455	1.89957	0.943396
300146	2015	3.2581	1	22.3136	2.3979	C	3.55535	3.52636	0.053259	0	2.3792	0.878895	C	863.097	455	1.89392	0
300151	2015	2.48491	0.16	20.6905	2.70805	C	3.82864	1.79176	0.053259	0	2.3792	0.105705	C	863.097	455	1.89562	0
300153	2015	1.79176	0.1	21.0292	2.63906	C	0	1.79176	0.053259	0	2.3792	-0.587442	C	863.097	455	1.89715	0.540541
300154	2015	2.07944	0.222222	21.2559	2.56495	C	4.8752	2.94444	0.053259	1	2.3792	-0.29976	C	863.097	455	1.89651	0
300155	2015	4.02535	0.5	21.0617	2.48491	C	5.03044	1.38629	0.053259	0	2.3792	1.64615	C	863.097	455	1.89223	1.33929
300157	2015	3.3322	0.38	22.078	1.94591	B	4.44265	3.4012	0.053259	0	2.36209	0.970112	B	17.484	15	1.01084	0
300164	2015	0	0.444444	21.4286	3.04452	B	0	0	0.053259	0	2.36209	-2.36209	B	17.484	15	1.24885	1.13636
300168	2015	4.65396	0.04	22.3478	3.04452	I	0	0	0.053259	1	2.38211	2.27185	I	133.506	32	4.1565	1.70455
300169	2015	0	0.277778	21.3226	2.89037	C	2.77259	2.63906	0.053259	0	2.3792	-2.3792	C	863.097	455	1.90109	0
300170	2015	3.97029	0.12	21.4692	2.63906	I	0	0.693147	0.053259	0	2.38211	1.58818	I	133.506	32	4.17856	1.05263
300171	2015	2.07944	0.08	22.125	3.13549	C	0	0	0.053259	1	2.3792	-0.29976	C	863.097	455	1.89651	0.689655
300177	2015	1.94591	0.15625	21.3669	2.30259	C	0	0	0.053259	0	2.3792	-0.433292	C	863.097	455	1.89681	0.487805
300184	2015	2.70805	0.06	20.7281	2.70805	F	3.98898	3.58352	0.053259	1	2.35517	0.352885	F	18.0825	7	2.56242	0
300188	2015	4.67283	0.25	21.5128	2.83321	I	3.93183	4.07754	0.053259	0	2.38211	2.29072	I	133.506	32	4.15589	1.70455
300191	2015	1.09861	0.1875	20.9532	2.56495	B	0	0.693147	0.053259	1	2.36209	-1.26348	B	17.484	15	1.17038	1.90476
300193	2015	1.60944	0.222222	21.5514	2.3979	C	0	1.09861	0.053259	0	2.3792	-0.769764	C	863.097	455	1.89755	0
300195	2015	2.83321	0.25	22.0248	3.04452	C	0	3.43399	0.053259	0	2.3792	0.454012	C	863.097	455	1.89485	1.07527
300199	2015	2.19722	0.333333	21.9891	2.56495	C	0	0	0.053259	0	2.3792	-0.181977	C	863.097	455	1.89625	0
300204	2015	0.693147	0.5	21.4512	2.63906	C	1.79176	2.83321	0.053259	0	2.3792	-1.68605	C	863.097	455	1.89957	3.125
300206	2015	3.46574	0.5	21.0966	3.04452	C	0	3.63759	0.053259	1	2.3792	1.08653	C	863.097	455	1.89346	0.636943
300207	2015	2.19722	0.0625	22.4657	2.94444	C	0	0	0.053259	1	2.3792	-0.181977	C	863.097	455	1.89625	0
300217	2015	0	0.111111	21.5634	2.77259	C	2.63906	0.693147	0.053259	0	2.3792	-2.3792	C	863.097	455	1.90109	0
300219	2015	2.63906	0.1875	21.4473	2.48491	C	0	2.56495	0.053259	0	2.3792	0.259856	C	863.097	455	1.89528	0
300220	2015	2.07944	1	19.9692	2.3979	C	4.61512	2.07944	0.053259	1	2.3792	-0.29976	C	863.097	455	1.89651	0
300221	2015	1.79176	0.0625	20.9663	2.94444	C	0	0	0.053259	0	2.3792	-0.587442	C	863.097	455	1.89715	1.62602
300223	2015	3.95124	0.0625	20.8422	2.3979	C	2.48491	2.19722	0.053259	1	2.3792	1.57204	C	863.097	455	1.89239	1.81818
300224	2015	1.79176	1	21.8011	2.77259	C	3.13549	1.09861	0.053259	0	2.3792	-0.587442	C	863.097	455	1.89715	0
300227	2015	1.94591	0.5	20.2191	2.3979	C	0	0	0.053259	1	2.3792	-0.433292	C	863.097	455	1.89681	1.18343
300228	2015	3.3673	0.388889	22.0703	2.56495	C	4.27667	3.4012	0.053259	0	2.3792	0.988094	C	863.097	455	1.89368	0.574713
300230	2015	1.09861	0.5625	21.2431	2.63906	C	0.693147	1.94591	0.053259	1	2.3792	-1.28059	C	863.097	455	1.89867	0.826446
300232	2015	3.61092	0.111111	21.2561	2.48491	C	3.8712	4.7362	0.053259	1	2.3792	1.23172	C	863.097	455	1.89314	0
300234	2015	1.60944	0.111111	20.5909	2.56495	C	3.63759	1.79176	0.053259	0	2.3792	-0.769764	C	863.097	455	1.89755	0
300238	2015	0.693147	0.0625	20.5089	2.83321	C	1.94591	0	0.053259	0	2.3792	-1.68605	C	863.097	455	1.89957	3.86473
300244	2015	3.52636	1	21.5528	2.70805	Q	0	2.89037	0.053259	1	2.41137	1.11499	Q	5.6058	2	2.07944	0.289855
300245	2015	3.43399	0.125	20.5198	2.70805	I	0	0	0.053259	1	2.38211	1.05187	I	133.506	32	4.19586	0
300247	2015	0	0.222222	21.3816	3.04452	C	5.23644	2.83321	0.053259	1	2.3792	-2.3792	C	863.097	455	1.90109	1.51515
300252	2015	2.99573	0.3125	21.5753	2.63906	C	4.70048	2.3979	0.053259	0	2.3792	0.61653	C	863.097	455	1.8945	0
300255	2015	1.09861	1	21.5684	2.77259	C	0	2.83321	0.053259	0	2.3792	-1.28059	C	863.097	455	1.89867	1.06383
300257	2015	1.09861	0.0625	22.1643	2.63906	C	0	0	0.053259	0	2.3792	-1.28059	C	863.097	455	1.89867	6.89655
300260	2015	2.63906	0.444444	20.738	2.77259	C	3.80666	2.19722	0.053259	1	2.3792	0.259856	C	863.097	455	1.89528	1.89873
300264	2015	3.58352	0.125	20.3121	2.77259	I	2.48491	2.99573	0.053259	0	2.38211	1.20141	I	133.506	32	4.19103	0.52356
300273	2015	4.11087	0.0625	22.0396	2.99573	C	4.56435	2.77259	0.053259	1	2.3792	1.73167	C	863.097	455	1.89204	0
300274	2015	1.60944	0.777778	22.6377	2.94444	C	5.7589	4.51086	0.053259	1	2.3792	-0.769764	C	863.097	455	1.89755	1.66667
300278	2015	1.79176	4	21.9017	2.56495	C	5.18739	2.48491	0.053259	0	2.3792	-0.587442	C	863.097	455	1.89715	0.584795
300279	2015	4.11087	0.111111	21.0127	2.89037	C	2.30259	3.85015	0.053259	0	2.3792	1.73167	C	863.097	455	1.89204	0.684932
300282	2015	2.07944	0.25	21.4993	2.56495	C	0	4.11087	0.053259	0	2.3792	-0.29976	C	863.097	455	1.89651	0
300284	2015	2.94444	0.1875	22.4181	2.63906	M	4.96284	3.85015	0.053259	0	2.37019	0.574245	M	12.0269	6	1.8165	0.729927
300285	2015	1.79176	1	20.8945	2.3979	C	0	2.19722	0.053259	0	2.3792	-0.587442	C	863.097	455	1.89715	1.0101
300287	2015	5.2832	1	22.4458	2.63906	I	4.68213	2.99573	0.053259	1	2.38211	2.90109	I	133.506	32	4.1362	1.08696
300290	2015	5.0626	0.25	20.791	2.3979	I	1.38629	0.693147	0.053259	1	2.38211	2.68048	I	133.506	32	4.14332	0
300292	2015	3.66356	0.5	21.8409	2.83321	C	4.58497	1.94591	0.053259	0	2.3792	1.28436	C	863.097	455	1.89302	0.515464
300296	2015	3.52636	3	22.3875	3.04452	C	5.9428	4.07754	0.053259	1	2.3792	1.14716	C	863.097	455	1.89333	0.371747
300298	2015	1.38629	2	21.0115	2.63906	C	3.71357	2.94444	0.053259	1	2.3792	-0.992907	C	863.097	455	1.89804	0.714286
300306	2015	1.60944	0.25	20.8672	2.56495	C	0	0	0.053259	1	2.3792	-0.769764	C	863.097	455	1.89755	0
300317	2015	2.3979	0.111111	22.5915	3.13549	C	0	0	0.053259	0	2.3792	0.0186935	C	863.097	455	1.89581	2.85714
300319	2015	2.19722	0.111111	21.4487	2.70805	C	4.23411	2.3979	0.053259	0	2.3792	-0.181977	C	863.097	455	1.89625	0
300322	2015	1.60944	1	20.9747	2.48491	C	4.36945	2.70805	0.053259	0	2.3792	-0.769764	C	863.097	455	1.89755	0
300323	2015	1.38629	1	22.1619	2.3979	C	3.66356	3.21888	0.053259	0	2.3792	-0.992907	C	863.097	455	1.89804	0.485437
300324	2015	4.80402	0.111111	21.5088	2.94444	I	0	0	0.053259	1	2.38211	2.42191	I	133.506	32	4.15166	2.84553
300327	2015	3.49651	0.111111	20.4225	3.09104	C	0	0	0.053259	0	2.3792	1.11731	C	863.097	455	1.89339	2.38095
300328	2015	0.693147	0.222222	20.6438	3.13549	C	0	0	0.053259	0	2.3792	-1.68605	C	863.097	455	1.89957	0
300339	2015	4.26268	0.611111	22.3324	2.30259	I	1.94591	1.38629	0.053259	1	2.38211	1.88057	I	133.506	32	4.16912	5.03597
300341	2015	1.09861	0.833333	20.7671	2.63906	C	0	3.78419	0.053259	0	2.3792	-1.28059	C	863.097	455	1.89867	1.98675
300347	2015	2.07944	1.22222	21.1995	2.48491	Q	0.693147	0.693147	0.053259	1	2.41137	-0.331928	Q	5.6058	2	3.52636	2.65957
300352	2015	4.62497	1	20.6942	2.99573	I	1.60944	2.19722	0.053259	1	2.38211	2.24286	I	133.506	32	4.15744	3.28947
300353	2015	4.47734	0.5	21.0759	2.77259	C	3.2581	3.43399	0.053259	0	2.3792	2.09813	C	863.097	455	1.89123	1.19048
300354	2015	2.19722	1	19.7159	3.13549	C	0	0	0.053259	0	2.3792	-0.181977	C	863.097	455	1.89625	0
300357	2015	2.07944	0.5	20.2314	2.63906	C	0.693147	2.56495	0.053259	1	2.3792	-0.29976	C	863.097	455	1.89651	0
300363	2015	1.94591	1	21.5901	2.3979	C	0	2.70805	0.053259	0	2.3792	-0.433292	C	863.097	455	1.89681	0
300364	2015	2.63906	1	20.5943	2.77259	R	0.693147	1.38629	0.053259	1	2.41925	0.21981	R	7.47534	3	2.41814	0
300369	2015	3.7612	1.5	21.4807	2.77259	I	0	4.23411	0.053259	1	2.38211	1.37909	I	133.506	32	4.1853	0
300370	2015	3.68888	2	21.1564	2.89037	C	0	0	0.053259	0	2.3792	1.30968	C	863.097	455	1.89297	0
300382	2015	0	0.25	20.5422	2.48491	C	0	0	0.053259	1	2.3792	-2.3792	C	863.097	455	1.90109	0
300387	2015	1.94591	4	20.8428	2.19722	C	2.19722	3.8712	0.053259	1	2.3792	-0.433292	C	863.097	455	1.89681	1.5748
300408	2015	2.3979	1	22.3316	3.17805	C	2.63906	2.89037	0.053259	0	2.3792	0.0186935	C	863.097	455	1.89581	0
300415	2015	1.38629	3.5	21.0857	2.63906	C	0	2.07944	0.053259	0	2.3792	-0.992907	C	863.097	455	1.89804	0
300417	2015	0.693147	1	19.7787	2.99573	C	3.58352	2.07944	0.053259	0	2.3792	-1.68605	C	863.097	455	1.89957	0
600008	2015	0.693147	0.0118343	24.3103	2.83321	D	0	1.38629	-0.02311	0	2.35397	-1.66083	D	3.46574	4	0.924196	3.42466
600010	2015	0.693147	0.25	25.6995	2.83321	C	0	0	-0.02311	0	2.3792	-1.68605	C	863.097	455	1.89957	1.25
600018	2015	2.94444	0.0625	25.3135	3.3322	G	0	2.63906	-0.02311	0	2.37902	0.56542	G	6.12249	3	1.58903	0
600028	2015	1.09861	0.0118343	27.9978	2.77259	B	0	0	-0.02311	0	2.36209	-1.26348	B	17.484	15	1.17038	1.13452
600031	2015	3.09104	0.13	24.8379	2.77259	C	0	0	-0.02311	0	2.3792	0.711841	C	863.097	455	1.89429	1.04167
600066	2015	1.60944	0.3125	24.1291	3.13549	C	0	3.80666	-0.02311	0	2.3792	-0.769764	C	863.097	455	1.89755	2.8169
600089	2015	1.09861	0.222222	24.9755	3.13549	C	0	0	-0.02311	0	2.3792	-1.28059	C	863.097	455	1.89867	3.33333
600100	2015	4.31749	0.347222	24.7639	2.94444	C	4.89035	4.99043	-0.02311	0	2.3792	1.93829	C	863.097	455	1.89158	1.49701
600141	2015	1.38629	0.16	23.7854	3.09104	C	0	0	-0.02311	0	2.3792	-0.992907	C	863.097	455	1.89804	0.833333
600143	2015	2.07944	0.180556	23.412	3.13549	C	0	0	-0.02311	0	2.3792	-0.29976	C	863.097	455	1.89651	6.42202
600151	2015	2.07944	0.16	23.1028	2.89037	C	0	3.4012	-0.02311	0	2.3792	-0.29976	C	863.097	455	1.89651	1.90476
600152	2015	0	0.00390625	21.0515	3.13549	C	3.89182	2.19722	-0.02311	0	2.3792	-2.3792	C	863.097	455	1.90109	2.43902
600160	2015	1.94591	0.111111	22.9417	2.89037	C	2.07944	2.63906	-0.02311	0	2.3792	-0.433292	C	863.097	455	1.89681	2.29885
600169	2015	1.94591	0.1875	24.0696	2.89037	C	0	4.56435	-0.02311	0	2.3792	-0.433292	C	863.097	455	1.89681	1.21951
600171	2015	2.3979	0.00694444	21.4498	2.89037	C	0	0	-0.02311	0	2.3792	0.0186935	C	863.097	455	1.89581	0
600176	2015	1.38629	0.242188	23.9048	2.83321	C	4.11087	3.3322	-0.02311	0	2.3792	-0.992907	C	863.097	455	1.89804	3.44828
600196	2015	2.70805	0.0247934	24.3661	3.09104	C	0	0	-0.02311	0	2.3792	0.328848	C	863.097	455	1.89513	1.47059
600216	2015	0.693147	0.046875	22.8333	2.94444	C	0	3.17805	-0.02311	0	2.3792	-1.68605	C	863.097	455	1.89957	4.08163
600226	2015	1.09861	0.0123457	21.5279	2.83321	C	0	0	-0.02311	0	2.3792	-1.28059	C	863.097	455	1.89867	0.47619
600235	2015	0	1	21.67	2.89037	C	1.94591	1.09861	-0.02311	0	2.3792	-2.3792	C	863.097	455	1.90109	3.0303
600261	2015	2.07944	0.0347222	22.3424	2.94444	C	4.82028	4.14313	-0.02311	0	2.3792	-0.29976	C	863.097	455	1.89651	0
600267	2015	1.38629	0.0694444	23.6768	2.89037	C	0	3.68888	-0.02311	1	2.3792	-0.992907	C	863.097	455	1.89804	6.60377
600271	2015	4.49981	0.0165289	23.3969	2.77259	C	0	5.50939	-0.02311	0	2.3792	2.12061	C	863.097	455	1.89118	1.8018
600282	2015	2.07944	0.3	24.3163	2.83321	C	0	5.60212	-0.02311	0	2.3792	-0.29976	C	863.097	455	1.89651	2.12766
600288	2015	1.38629	0.06	21.8437	2.89037	C	4.18965	4.15888	-0.02311	1	2.3792	-0.992907	C	863.097	455	1.89804	1.67598
600295	2015	1.38629	1	24.5184	3.04452	C	3.52636	0.693147	-0.02311	1	2.3792	-0.992907	C	863.097	455	1.89804	1.44928
600298	2015	1.94591	0.12	22.5473	2.89037	C	0	0	-0.02311	0	2.3792	-0.433292	C	863.097	455	1.89681	1.13636
600302	2015	1.94591	0.0277778	21.2017	2.83321	C	0	1.60944	-0.02311	0	2.3792	-0.433292	C	863.097	455	1.89681	0
600308	2015	0.693147	0.04	23.4979	3.13549	C	0	0	-0.02311	0	2.3792	-1.68605	C	863.097	455	1.89957	3.27869
600309	2015	1.38629	0.123457	24.5904	2.89037	C	0	4.40672	-0.02311	0	2.3792	-0.992907	C	863.097	455	1.89804	1.69492
600315	2015	1.79176	0.0147929	22.8224	3.04452	C	0	2.89037	-0.02311	1	2.3792	-0.587442	C	863.097	455	1.89715	0
600332	2015	1.38629	0.25	23.4877	2.94444	C	1.38629	3.95124	-0.02311	0	2.3792	-0.992907	C	863.097	455	1.89804	2.69608
600352	2015	0	0.065	24.0053	2.89037	C	0	0	-0.02311	1	2.3792	-2.3792	C	863.097	455	1.90109	3.26087
600366	2015	0	0.03125	22.3015	3.09104	C	0	4.00733	-0.02311	0	2.3792	-2.3792	C	863.097	455	1.90109	1.1236
600380	2015	1.79176	0.0255102	23.3476	3.17805	C	0	1.79176	-0.02311	0	2.3792	-0.587442	C	863.097	455	1.89715	5.02513
600389	2015	0	0.25	21.8611	3.2581	C	0	0	-0.02311	0	2.3792	-2.3792	C	863.097	455	1.90109	4.70588
600409	2015	0	0.111111	23.7362	2.83321	C	0	0	-0.02311	0	2.3792	-2.3792	C	863.097	455	1.90109	2.30769
600422	2015	2.63906	6	22.3223	3.04452	C	0	4.74493	-0.02311	0	2.3792	0.259856	C	863.097	455	1.89528	3.6
600429	2015	1.60944	0.00694444	22.7496	2.94444	C	0	2.56495	-0.02311	0	2.3792	-0.769764	C	863.097	455	1.89755	0
600438	2015	1.79176	0.0625	22.5299	3.04452	C	0	0	-0.02311	0	2.3792	-0.587442	C	863.097	455	1.89715	0.657895
600439	2015	2.07944	0.0694444	22.3082	2.83321	C	3.21888	0.693147	-0.02311	0	2.3792	-0.29976	C	863.097	455	1.89651	14.1176
600448	2015	2.3979	0.5	21.6109	2.83321	C	0	2.30259	-0.02311	0	2.3792	0.0186935	C	863.097	455	1.89581	1.23457
600458	2015	1.60944	0.25	23.2947	3.09104	C	0	0	-0.023502	0	2.3792	-0.769764	C	863.097	455	1.89755	0.869565
600477	2015	0	2	22.5831	3.09104	E	0	0	-0.023502	0	2.3557	-2.3557	E	28.8432	19	1.6024	7.69231
600478	2015	0.693147	0.0833333	22.0627	2.89037	C	0	0	-0.023502	1	2.3792	-1.68605	C	863.097	455	1.89957	2.1978
600487	2015	3.43399	0.5	23.463	3.13549	C	0	4.04305	-0.023502	0	2.3792	1.05479	C	863.097	455	1.89353	3.28947
600488	2015	1.09861	0.037037	21.8329	2.83321	C	0	1.38629	-0.023502	1	2.3792	-1.28059	C	863.097	455	1.89867	2.53807
600496	2015	0	0.171875	23.0693	2.83321	E	0	3.71357	-0.023502	0	2.3557	-2.3557	E	28.8432	19	1.6024	3.52941
600497	2015	0.693147	0.153061	24.2345	2.77259	B	3.52636	1.60944	-0.023502	0	2.36209	-1.66894	B	17.484	15	1.19934	2.67857
600500	2015	1.38629	0.0833333	24.4206	2.89037	C	0	4.11087	-0.023502	0	2.3792	-0.992907	C	863.097	455	1.89804	1.60428
600501	2015	2.77259	0.0625	22.28	2.83321	C	0	0	-0.023502	0	2.3792	0.393387	C	863.097	455	1.89499	1.12994
600503	2015	3.04452	2	22.4129	2.83321	K	0	0	-0.023502	0	2.37019	0.674328	K	5.68358	3	1.31953	2.05479
600510	2015	1.94591	0.00826446	23.6352	3.04452	K	0	1.38629	-0.023502	0	2.37019	-0.424284	K	5.68358	3	1.86883	1.63934
600522	2015	2.19722	0.444444	23.4771	2.83321	C	0	4.82831	-0.023502	0	2.3792	-0.181977	C	863.097	455	1.89625	0.847458
600525	2015	1.38629	0.0325444	22.9578	3.4012	C	0	0	-0.023502	0	2.3792	-0.992907	C	863.097	455	1.89804	1.78571
600526	2015	1.09861	0.04	22.6516	2.77259	C	0	0	-0.023502	0	2.3792	-1.28059	C	863.097	455	1.89867	0
600535	2015	2.48491	0.0123457	23.4585	2.89037	C	0	7.10661	-0.023502	0	2.3792	0.105705	C	863.097	455	1.89562	0.955414
600537	2015	0.693147	0.222222	22.6292	3.46574	C	4.91265	4.33073	-0.023502	1	2.3792	-1.68605	C	863.097	455	1.89957	3.09735
600549	2015	1.09861	0.12	23.4951	2.94444	C	0.693147	3.04452	-0.023502	0	2.3792	-1.28059	C	863.097	455	1.89867	4.06504
600557	2015	1.79176	0.0123457	22.1829	2.99573	C	0	5.57973	-0.023502	1	2.3792	-0.587442	C	863.097	455	1.89715	5.40541
600577	2015	1.60944	1	22.2191	2.77259	C	0	2.56495	-0.023502	0	2.3792	-0.769764	C	863.097	455	1.89755	3.33333
600580	2015	2.63906	0.263889	23.367	2.89037	C	0	3.13549	-0.023502	0	2.3792	0.259856	C	863.097	455	1.89528	0.740741
600583	2015	1.09861	0.132812	24.1714	2.77259	B	0	0	-0.023502	0	2.36209	-1.26348	B	17.484	15	1.17038	1.81818
600584	2015	1.79176	0.1	23.9642	2.77259	C	0	6.06611	-0.023502	0	2.3792	-0.587442	C	863.097	455	1.89715	0.598802
600588	2015	4.14313	0.00510204	23.1137	2.83321	I	0	0	-0.023502	1	2.38211	1.76102	I	133.506	32	4.17298	0
600590	2015	3.91202	0.5	22.6915	2.99573	C	0	0	-0.023502	0	2.3792	1.53282	C	863.097	455	1.89248	1.79372
600596	2015	1.38629	0.104938	22.7824	3.13549	C	0	0	-0.023502	0	2.3792	-0.992907	C	863.097	455	1.89804	3.125
600612	2015	0	0.333333	23.1708	3.17805	C	0	0	-0.023502	0	2.3792	-2.3792	C	863.097	455	1.90109	1.8018
600616	2015	0	0.25	21.6256	3.17805	C	0	0.693147	-0.023502	0	2.3792	-2.3792	C	863.097	455	1.90109	0
600619	2015	1.79176	0.5	23.0831	3.17805	C	0	5.67675	-0.023502	0	2.3792	-0.587442	C	863.097	455	1.89715	0
600630	2015	1.09861	0.00390625	21.5982	3.17805	C	1.60944	1.09861	-0.023502	0	2.3792	-1.28059	C	863.097	455	1.89867	0
600637	2015	3.73767	0.888889	24.2866	3.17805	I	2.07944	2.30259	-0.023502	0	2.38211	1.35556	I	133.506	32	4.18606	0
600645	2015	1.60944	0.00390625	21.7586	3.17805	M	0	0	-0.023502	0	2.37019	-0.760756	M	12.0269	6	2.0835	0.729927
600651	2015	2.30259	0.0266272	22.848	3.46574	C	0	2.94444	-0.023502	0	2.3792	-0.0766167	C	863.097	455	1.89602	0.529101
600654	2015	4.69135	6.5	22.5805	3.3673	I	4.77068	3.49651	-0.023502	0	2.38211	2.30923	I	133.506	32	4.1553	0.543478
600685	2015	2.07944	0.0173611	24.615	3.13549	C	0	0	-0.023502	0	2.3792	-0.29976	C	863.097	455	1.89651	1.26582
600686	2015	1.94591	0.0136719	23.9573	3.17805	C	0	3.09104	-0.023502	0	2.3792	-0.433292	C	863.097	455	1.89681	4.09836
600703	2015	1.38629	0.333333	23.7572	3.13549	C	0	0	-0.023502	0	2.3792	-0.992907	C	863.097	455	1.89804	1.78571
600717	2015	2.07944	0.25	24.2376	3.52636	G	0	2.83321	-0.023502	0	2.37902	-0.299577	G	6.12249	3	2.02153	1.33333
600718	2015	4.51086	0.0622222	23.2175	3.21888	I	0	0	-0.023502	1	2.38211	2.12875	I	133.506	32	4.16112	0
600761	2015	2.30259	1	22.4693	3.13549	C	0	0	-0.023502	0	2.3792	-0.0766167	C	863.097	455	1.89602	1.16279
600782	2015	1.09861	0.25	24.0635	2.99573	C	0	0	-0.023502	0	2.3792	-1.28059	C	863.097	455	1.89867	0
600796	2015	0	0.0204082	20.7939	3.13549	C	0	1.09861	-0.023502	1	2.3792	-2.3792	C	863.097	455	1.90109	2.17391
600797	2015	4.35671	0.00390625	22.1768	3.09104	I	1.94591	0	-0.023502	0	2.38211	1.9746	I	133.506	32	4.16609	1.93548
600801	2015	0	0.5	23.9614	3.13549	C	4.41884	3.13549	-0.023502	0	2.3792	-2.3792	C	863.097	455	1.90109	1.40845
600812	2015	1.79176	0.00591716	23.4957	3.17805	C	0	0	-0.023502	0	2.3792	-0.587442	C	863.097	455	1.89715	1.30208
600815	2015	2.07944	0.0277778	22.9764	3.09104	C	0	0	-0.023502	0	2.3792	-0.29976	C	863.097	455	1.89651	4.34783
600820	2015	1.38629	0.0153061	24.8646	3.13549	E	0	3.73767	-0.023502	0	2.3557	-0.969407	E	28.8432	19	1.52538	3.62319
600843	2015	2.30259	0.01	21.8696	3.13549	C	0	0	-0.023502	1	2.3792	-0.0766167	C	863.097	455	1.89602	0
600850	2015	3.3673	0.0206612	22.2861	3.09104	I	0	1.94591	-0.023502	0	2.38211	0.985182	I	133.506	32	4.19801	1.0101
600853	2015	1.60944	0.1875	22.763	3.13549	E	2.30259	0.693147	-0.023502	0	2.3557	-0.746264	E	28.8432	19	1.51299	1.11111
600875	2015	0.693147	0.0612245	25.1792	3.13549	C	0	4.85203	-0.023502	0	2.3792	-1.68605	C	863.097	455	1.89957	0.505051
600884	2015	1.94591	0.0972222	23.0455	3.17805	C	0	1.94591	-0.023502	1	2.3792	-0.433292	C	863.097	455	1.89681	0.387597
600885	2015	2.07944	0.777778	22.4089	3.2581	C	0	4.11087	-0.023502	1	2.3792	-0.29976	C	863.097	455	1.89651	2.38095
600887	2015	1.79176	0.112245	24.4029	3.13549	C	0	0	-0.023502	1	2.3792	-0.587442	C	863.097	455	1.89715	0.833333
600889	2015	0.693147	0.01	21.4985	3.17805	C	1.94591	0.693147	-0.023502	0	2.3792	-1.68605	C	863.097	455	1.89957	1.96078
600893	2015	2.56495	0.0408163	24.5865	3.13549	C	5.74939	6.22258	-0.023502	0	2.3792	0.185748	C	863.097	455	1.89544	0
600894	2015	3.52636	0.333333	22.9504	3.13549	C	0	0	-0.023502	0	2.3792	1.14716	C	863.097	455	1.89333	0
600900	2015	1.38629	0.0625	25.6791	2.63906	D	0	0	-0.023502	0	2.35397	-0.967678	D	3.46574	4	0.693147	5.06329
600970	2015	1.09861	0.444444	24.0744	2.70805	C	0	0	-0.023502	0	2.3792	-1.28059	C	863.097	455	1.89867	2.98507
600997	2015	0	0.0555556	23.7358	2.70805	C	0	0.693147	-0.023502	0	2.3792	-2.3792	C	863.097	455	1.90109	0.869565
601012	2015	0.693147	0.111111	23.0465	2.77259	C	0	0	-0.023502	0	2.3792	-1.68605	C	863.097	455	1.89957	4.8
601028	2015	0.693147	0.15625	21.9048	2.83321	C	2.48491	0	-0.023502	0	2.3792	-1.68605	C	863.097	455	1.89957	0.980392
601038	2015	2.48491	0.222222	23.309	2.94444	C	0	0	-0.023502	0	2.3792	0.105705	C	863.097	455	1.89562	0.833333
601058	2015	2.30259	0.888889	23.288	2.63906	C	0	2.83321	-0.023502	0	2.3792	-0.0766167	C	863.097	455	1.89602	2.17391
601088	2015	1.09861	0.0714286	27.0404	2.48491	B	0	4.7185	-0.023502	0	2.36209	-1.26348	B	17.484	15	1.17038	2.99003
601100	2015	2.07944	0.555556	22.271	2.3979	C	0	2.89037	-0.023502	0	2.3792	-0.29976	C	863.097	455	1.89651	2.11268
601101	2015	0.693147	0.0625	23.6092	2.63906	B	0	1.09861	-0.023502	0	2.36209	-1.66894	B	17.484	15	1.19934	0.833333
601106	2015	2.30259	0.0625	24.3626	2.07944	C	0	3.63759	-0.023502	0	2.3792	-0.0766167	C	863.097	455	1.89602	0
601117	2015	1.38629	0.0555556	25.1269	2.07944	E	0	0	-0.023502	0	2.3557	-0.969407	E	28.8432	19	1.52538	1.66667
601126	2015	3.3673	0.333333	22.441	3.09104	C	0	0	-0.023502	0	2.3792	0.988094	C	863.097	455	1.89368	0
601137	2015	1.79176	0.0625	21.7258	3.13549	C	0	4.21951	-0.023502	0	2.3792	-0.587442	C	863.097	455	1.89715	0
601177	2015	2.89037	0.08	22.1047	2.94444	C	0	3.13549	-0.023502	0	2.3792	0.51117	C	863.097	455	1.89473	4.25532
601222	2015	3.04452	0.111111	22.6726	3.04452	C	0	2.70805	-0.023502	1	2.3792	0.665321	C	863.097	455	1.89439	1.64835
601238	2015	1.09861	1.05556	24.9304	2.94444	C	6.18826	5.00395	-0.023502	0	2.3792	-1.28059	C	863.097	455	1.89867	4
601339	2015	1.79176	0.5	23.1306	2.48491	C	1.60944	1.38629	-0.023502	1	2.3792	-0.587442	C	863.097	455	1.89715	4.03226
[truncated: 7,307 more rows]
