# Supplementary material
Source: Research Square preprint supplement (doi:10.21203/rs.3.rs-9963522/v1)
Supplement: Supplementary file 2 [file f76c37c7455796efa2ea391c.docx]

**Supplementary Table S1. Digital transformation keyword dictionary**

| Digital Transformation Dimensions | Artificial Intelligence Technology | neural networks, intelligent data analysis, biometric technology, speech recognition, deep learning, business intelligence, facial recognition, artificial intelligence, human-computer interaction, machine learning, image understanding, investment decision support systems, intelligent robots, large models, generative AI, autonomous driving |
| --- | --- | --- |
| Big Data Technology | mixed reality, credit investigation, data governance, text mining, data analysis, virtual reality, data security, heterogeneous data, data mining, big data, augmented reality, data visualization |
| Cloud Computing Technology | graph computing, exabyte-level, green computing, brain-inspired computing, converged architecture, in-memory computing, cloud computing, cognitive computing, secure multi-party computation, hundred-million-level concurrency, stream computing, enterprise cloud migration, blockchain technology, blockchain, digital currency, distributed computing, differential privacy technology, smart financial contracts, consensus mechanisms, supply chain finance, traceability systems, asymmetric encryption |
| Information Technology | informatization, industrial communication, information terminals, information networks, information integration, information software, information centers, industrial information, information sharing, information systems, information management, networking |
| Internet of Things Technology | Internet of Things, Industrial Internet of Things, Industrial Internet, industrial automation, intelligent control, remote control, edge computing, smart home, intelligent transportation, smart healthcare, wearable smart devices |

Notes: The main manuscript can summarize this measure in the variable-definition section and refer readers to Supplementary Table S1 for the full dictionary.
